# Supplementary material
Source: PubMed Central journal article supplement (PMC2659660)

Formation and Utility of Azasilacyclopentadienes Derived from Silacyclopropenes  
and Nitriles

*Laura L. Anderson and K. A. Woerpel*

*Department of Chemistry, University of California, Irvine*

*Irvine, CA 92697-2025*

**Supporting Information**

**Contents:**

|     |                                          |      |
|-----|------------------------------------------|------|
| I.  | Scanned $^1\text{H}$ NMR Spectra.....    | S-2  |
| II. | Scanned $^{13}\text{C}$ NMR Spectra..... | S-41 |

1H of LA4-95-2 8/20/07

1.0403  
1.0861  
1.0942  
1.4056  
2.0228  
2.0784  
2.6975  
2.6989  
2.7088  
2.7090  
2.7092  
2.7110  
2.7112  
2.7114  
2.7116  
2.7118  
2.7120  
2.7122  
2.7124  
2.7126  
2.7128  
2.7130  
2.7132  
2.7134  
2.7136  
2.7138  
2.7140  
2.7142  
2.7144  
2.7146  
2.7148  
2.7150  
2.7152  
2.7154  
2.7156  
2.7158  
2.7160  
2.7162  
2.7164  
2.7166  
2.7168  
2.7170  
2.7172  
2.7174  
2.7176  
2.7178  
2.7180  
2.7182  
2.7184  
2.7186  
2.7188  
2.7190  
2.7192  
2.7194  
2.7196  
2.7198  
2.7200  
2.7202  
2.7204  
2.7206  
2.7208  
2.7210  
2.7212  
2.7214  
2.7216  
2.7218  
2.7220  
2.7222  
2.7224  
2.7226  
2.7228  
2.7230  
2.7232  
2.7234  
2.7236  
2.7238  
2.7240  
2.7242  
2.7244  
2.7246  
2.7248  
2.7250  
2.7252  
2.7254  
2.7256  
2.7258  
2.7260  
2.7262  
2.7264  
2.7266  
2.7268  
2.7270  
2.7272  
2.7274  
2.7276  
2.7278  
2.7280  
2.7282  
2.7284  
2.7286  
2.7288  
2.7290  
2.7292  
2.7294  
2.7296  
2.7298  
2.7300  
2.7302  
2.7304  
2.7306  
2.7308  
2.7310  
2.7312  
2.7314  
2.7316  
2.7318  
2.7320  
2.7322  
2.7324  
2.7326  
2.7328  
2.7330  
2.7332  
2.7334  
2.7336  
2.7338  
2.7340  
2.7342  
2.7344  
2.7346  
2.7348  
2.7350  
2.7352  
2.7354  
2.7356  
2.7358  
2.7360  
2.7362  
2.7364  
2.7366  
2.7368  
2.7370  
2.7372  
2.7374  
2.7376  
2.7378  
2.7380  
2.7382  
2.7384  
2.7386  
2.7388  
2.7390  
2.7392  
2.7394  
2.7396  
2.7398  
2.7400  
2.7402  
2.7404  
2.7406  
2.7408  
2.7410  
2.7412  
2.7414  
2.7416  
2.7418  
2.7420  
2.7422  
2.7424  
2.7426  
2.7428  
2.7430  
2.7432  
2.7434  
2.7436  
2.7438  
2.7440  
2.7442  
2.7444  
2.7446  
2.7448  
2.7450  
2.7452  
2.7454  
2.7456  
2.7458  
2.7460  
2.7462  
2.7464  
2.7466  
2.7468  
2.7470  
2.7472  
2.7474  
2.7476  
2.7478  
2.7480  
2.7482  
2.7484  
2.7486  
2.7488  
2.7490  
2.7492  
2.7494  
2.7496  
2.7498  
2.7500

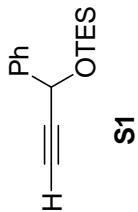

Current Data Parameters  
 LNAME LA4-95  
 EXPNO 2  
 PROCNO 1  
 F2 - Acquisition Parameters  
 INSTRUM spect  
 PULPROG zgpg30  
 PRGNAME 5 mm QNP H77P  
 TD 65536  
 SOLVENT CDCl3  
 NS 2  
 DS 2  
 SWH 640.296 MHz  
 FIDRES 0.399813 Hz  
 AQ 0.1114188 sec  
 EN 79.000 umsec  
 TE 300.2 K  
 DE 0.000000 sec  
 DI 0.000000 sec  
 DQ 0.000000 sec  
 WALTZ16 0.000000 sec  
 WALTZ17 0.000000 sec  
 WALTZ18 0.000000 sec  
 \*\*\*\*\* CHANNEL f1 \*\*\*\*\*  
 NUC1 13C  
 P1 12.00 umsec  
 PL1 0.00 dB  
 SFO1 400.1326000 MHz  
 F2 - Processing parameters  
 SI 32768  
 SF 400.1326000 MHz  
 WDR 4  
 WDW EM  
 GB 0  
 SB 0  
 SC 1.00  
 SD MS-DOS Parameters  
 EX 32.86 cm  
 FID 12.00 cm  
 F1 4001.35 Hz  
 F2 -1.800 MHz  
 F3 0.000 MHz  
 PWDCH 0.48242 DMACH  
 MDCM 193.04518 Hz/cm

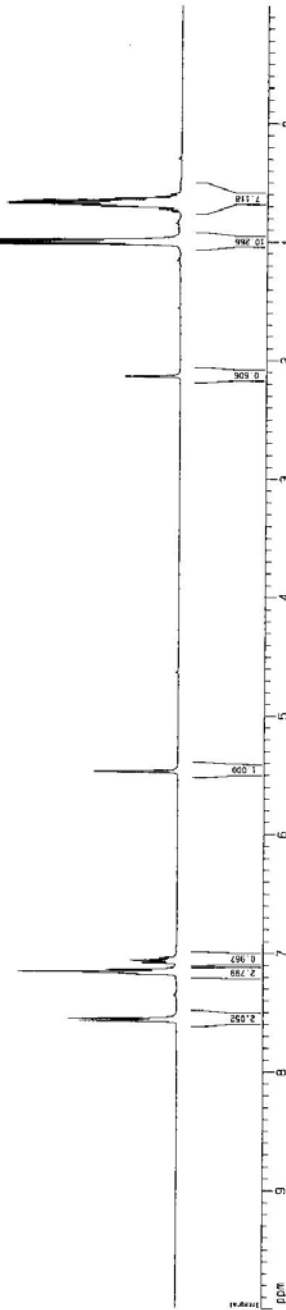



1H of LAS-82-1 4/23/08

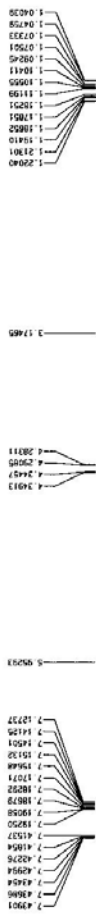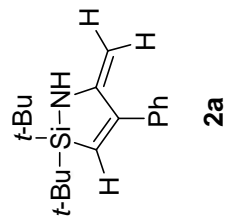

Current Data Parameters  
 USER: LAURA  
 SAMPLE: LAS-82-1  
 EXPNO: 1  
 PROCNO: 1

F2 - Acquisition Parameters  
 Date\_: 25/05/03  
 Time: 21:41  
 Acquisition: 300 MHz  
 PROBHD: 5 mm QNP 1H/13  
 PULPROG: zgpg30  
 TD: 65536  
 SFO: 300.135060  
 AQ: 5.110000  
 RG: 2048  
 DE: 4.50 uW  
 TE: 300.2 K  
 FIDRES: 0.1000000 Hz  
 AQRES: 0.0500000 Hz  
 MDRES: 0.0500000 Hz  
 MCNRC: 0.0100000 Hz

\*\*\*\*\* CHANNEL f1 \*\*\*\*\*  
 NUC1: 13 C  
 P1: 12.00 nW  
 PL1: 0.00 dB  
 SFO1: 101.626120 MHz

F2 - Processing parameters  
 SI: 400.1499600 MHz  
 SF: 300.1350600 MHz  
 DS: 4  
 SSF: 1.000000  
 LB: 0.30 Hz  
 GB: 0  
 PC: 1.00

DWAS 231E Parameters  
 CY: 15.00 cm  
 CT: 12.00 cm  
 FIP: 10.000 MHz  
 F1: 300.1350600 MHz  
 F2: 101.6261200 MHz  
 F3: -100.13 Hz  
 PREAM: 3.46246 uW/cm  
 RECU: 131.6261201 Hz

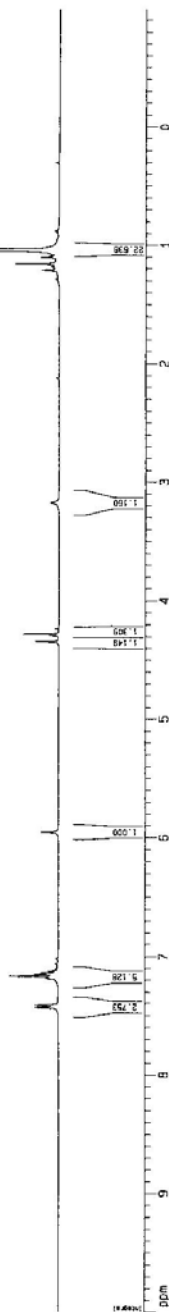

1H of LA5-140-1 6/12/08

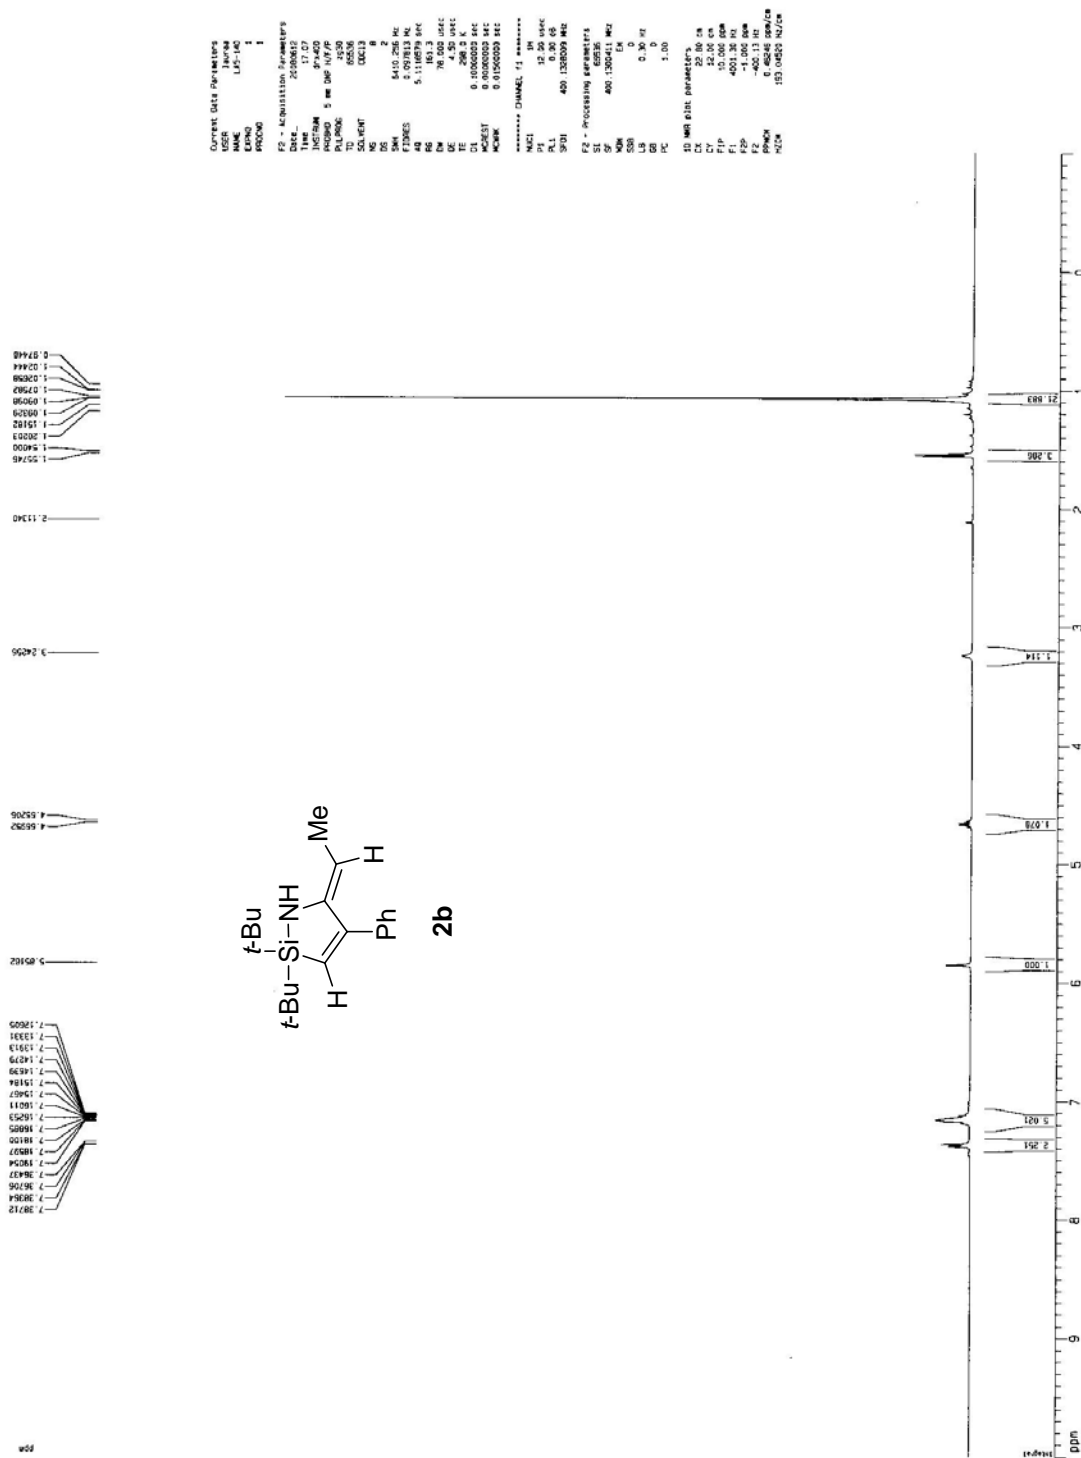

<sup>1</sup>H of LA5-153-1 6/16/08

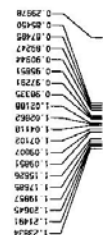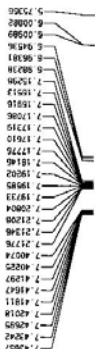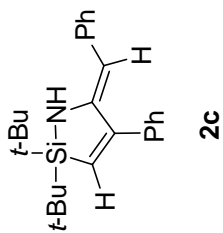

Current Data Parameters  
NAME LA5-153  
EXPNO 1  
PROCNO 1  
F2 - Acquisition Parameters  
Date\_ 20080515  
Time 15.42  
INSTRUM spect  
PROBHD 5 mm QNP 1H/2  
PULPROG zgpg30  
AQ 6.535  
RG 327.5  
AQ 6.535  
RG 327.5  
SFO1 400.1326095 MHz  
F2 - Processing parameters  
SI 65536  
SF 400.1300366 MHz  
WDW EM  
SSB 0  
LB 0.20 Hz  
GB 0  
PC 1.00  
3D MMS list parameters  
SI 65536  
SF 400.1300366 MHz  
WDW EM  
SSB 0  
LB 0.20 Hz  
GB 0  
PC 1.00  
===== CHANNEL f1 =====  
NUC1 1H  
P1 12.00 nsec  
PL1 0.00 dB  
SFO1 400.1326095 MHz  
F2 - Processing parameters  
SI 65536  
SF 400.1300366 MHz  
WDW EM  
SSB 0  
LB 0.20 Hz  
GB 0  
PC 1.00  
3D MMS list parameters  
SI 65536  
SF 400.1300366 MHz  
WDW EM  
SSB 0  
LB 0.20 Hz  
GB 0  
PC 1.00

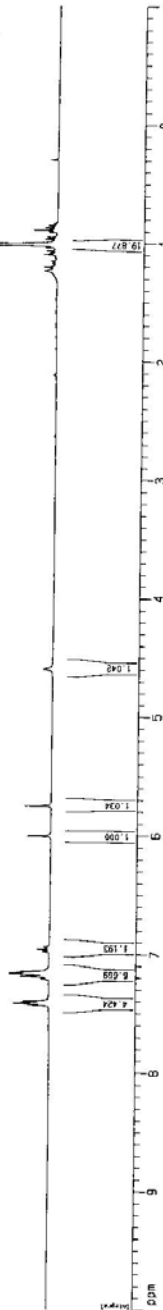

1H of LA4-66-1 7/19/07

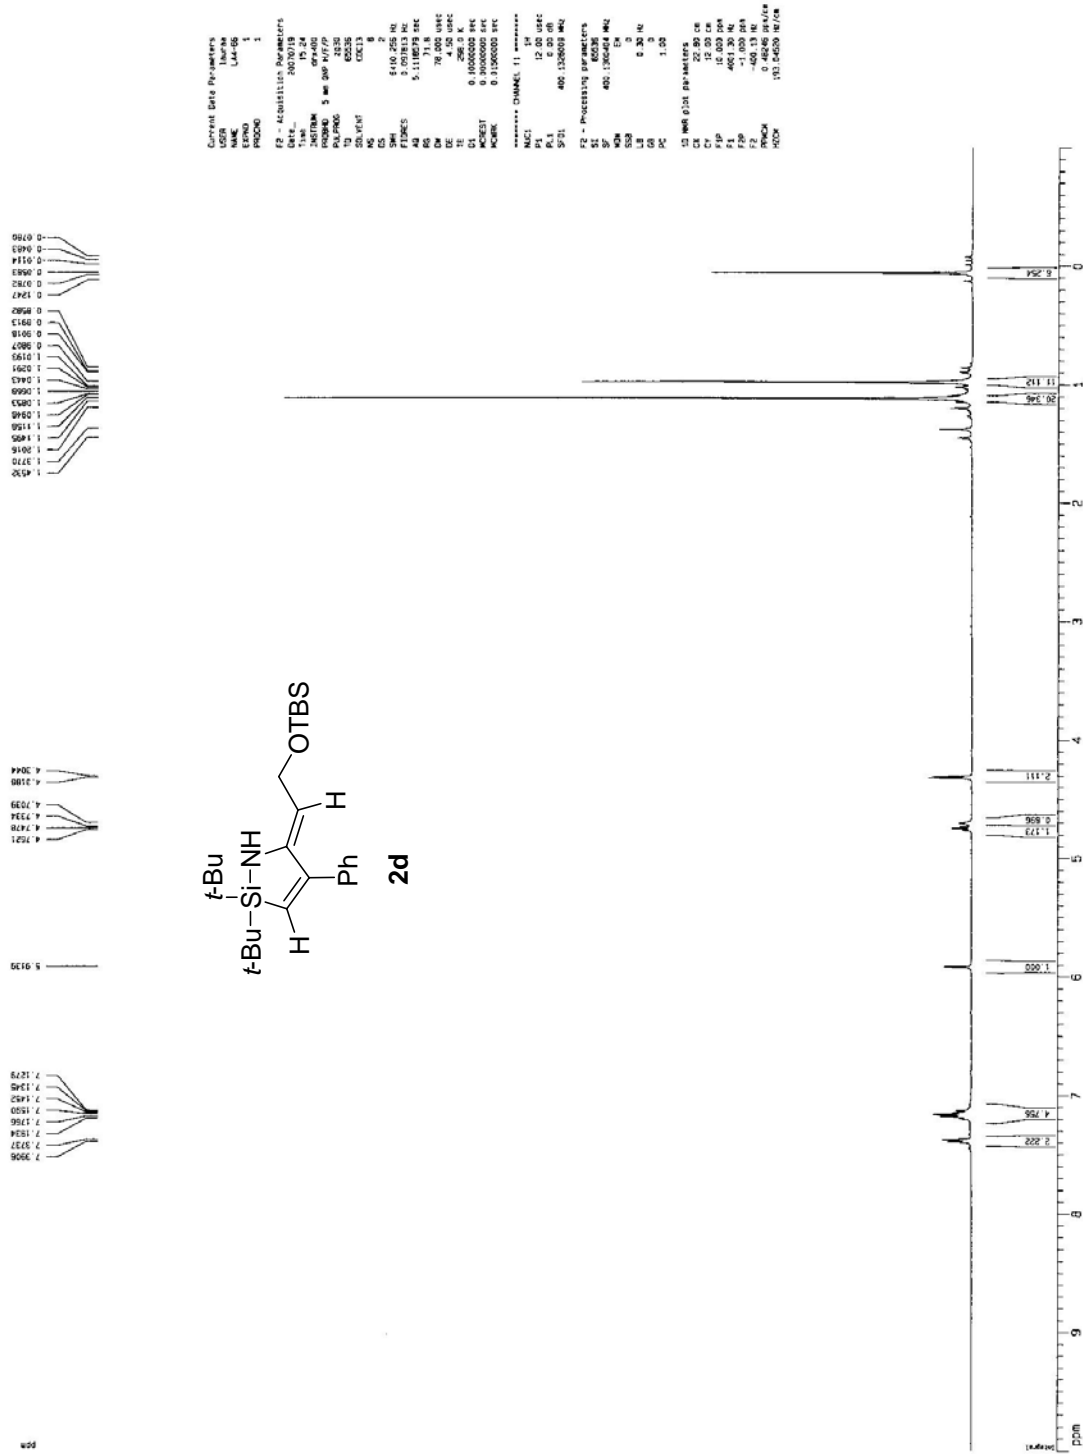

1H of LA5-134-1 6/11/08

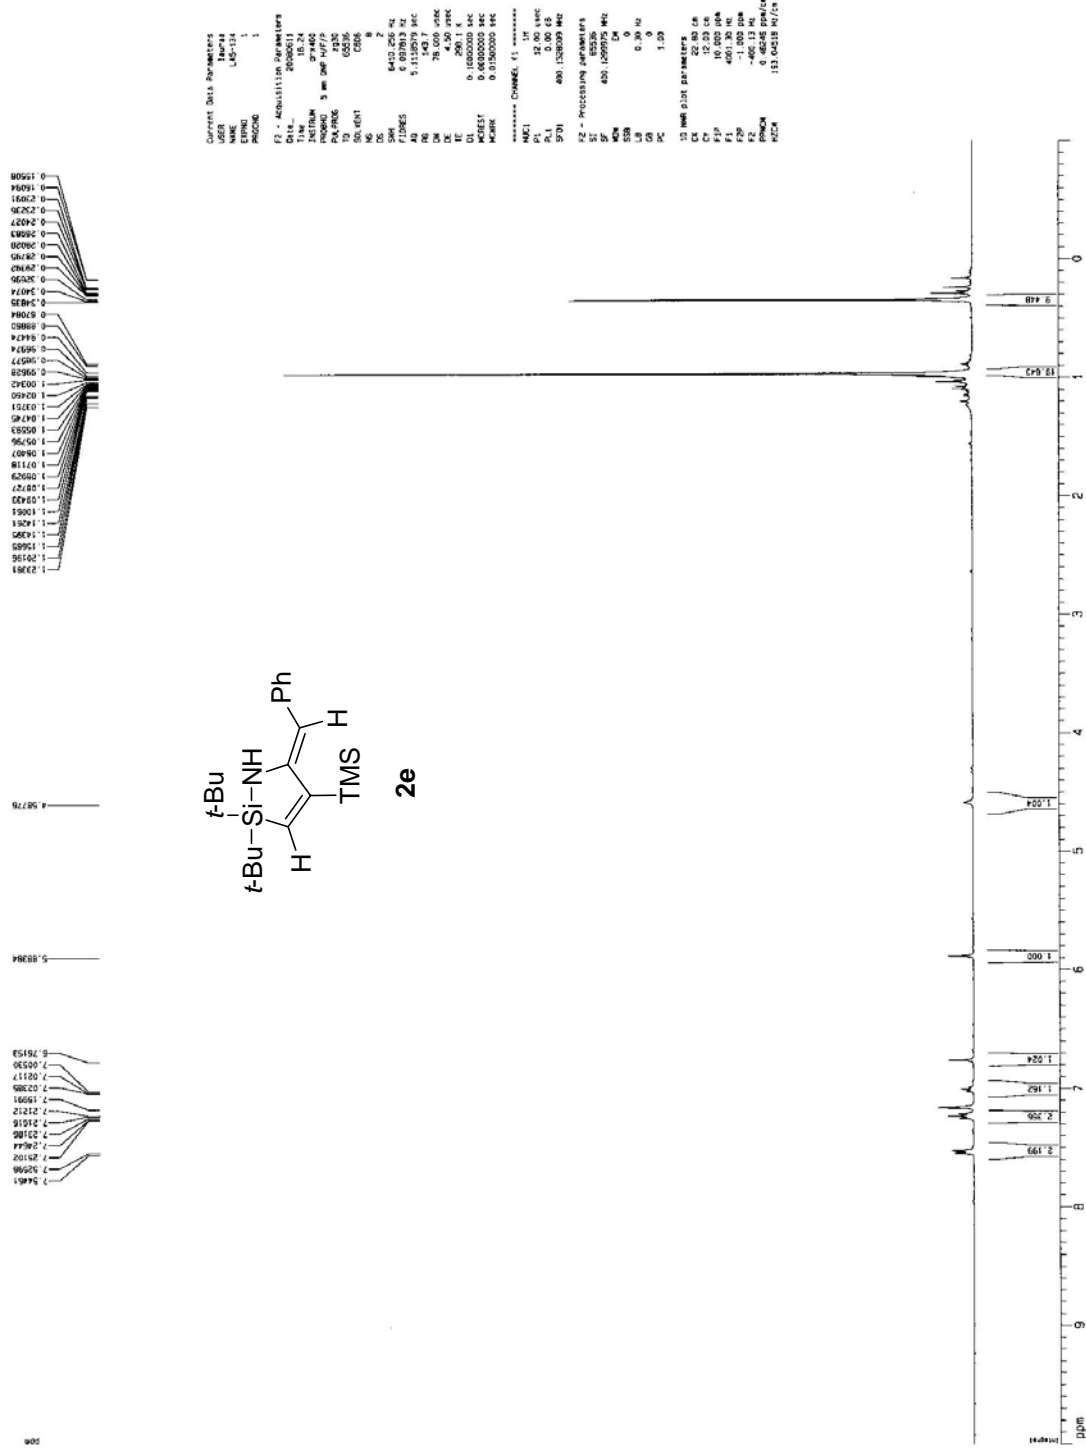







<sup>1</sup>H of LA5-46-2 4/1/08

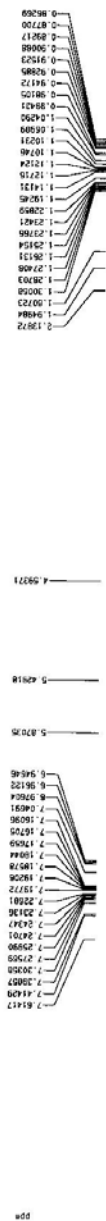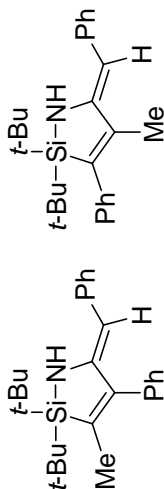

10:1  
5a

Current Data Parameters  
 USER: LA5-46  
 NAME: LA5-46  
 PROCNO: 1

Acquisition Parameters  
 Date\_: 20080919  
 Time: 19:24  
 INSTRUM: cryo500  
 PULPROG: zgpg30  
 AQCPOBS: 13C-CP131-800  
 13: 81.758  
 14: 101.325  
 15: 125.761  
 16: 128.131  
 17: 128.131  
 18: 128.131  
 19: 128.131  
 20: 128.131  
 21: 128.131  
 22: 128.131  
 23: 128.131  
 24: 128.131  
 25: 128.131  
 26: 128.131  
 27: 128.131  
 28: 128.131  
 29: 128.131  
 30: 128.131  
 31: 128.131  
 32: 128.131  
 33: 128.131  
 34: 128.131  
 35: 128.131  
 36: 128.131  
 37: 128.131  
 38: 128.131  
 39: 128.131  
 40: 128.131  
 41: 128.131  
 42: 128.131  
 43: 128.131  
 44: 128.131  
 45: 128.131  
 46: 128.131  
 47: 128.131  
 48: 128.131  
 49: 128.131  
 50: 128.131  
 51: 128.131  
 52: 128.131  
 53: 128.131  
 54: 128.131  
 55: 128.131  
 56: 128.131  
 57: 128.131  
 58: 128.131  
 59: 128.131  
 60: 128.131  
 61: 128.131  
 62: 128.131  
 63: 128.131  
 64: 128.131  
 65: 128.131  
 66: 128.131  
 67: 128.131  
 68: 128.131  
 69: 128.131  
 70: 128.131  
 71: 128.131  
 72: 128.131  
 73: 128.131  
 74: 128.131  
 75: 128.131  
 76: 128.131  
 77: 128.131  
 78: 128.131  
 79: 128.131  
 80: 128.131  
 81: 128.131  
 82: 128.131  
 83: 128.131  
 84: 128.131  
 85: 128.131  
 86: 128.131  
 87: 128.131  
 88: 128.131  
 89: 128.131  
 90: 128.131  
 91: 128.131  
 92: 128.131  
 93: 128.131  
 94: 128.131  
 95: 128.131  
 96: 128.131  
 97: 128.131  
 98: 128.131  
 99: 128.131  
 100: 128.131

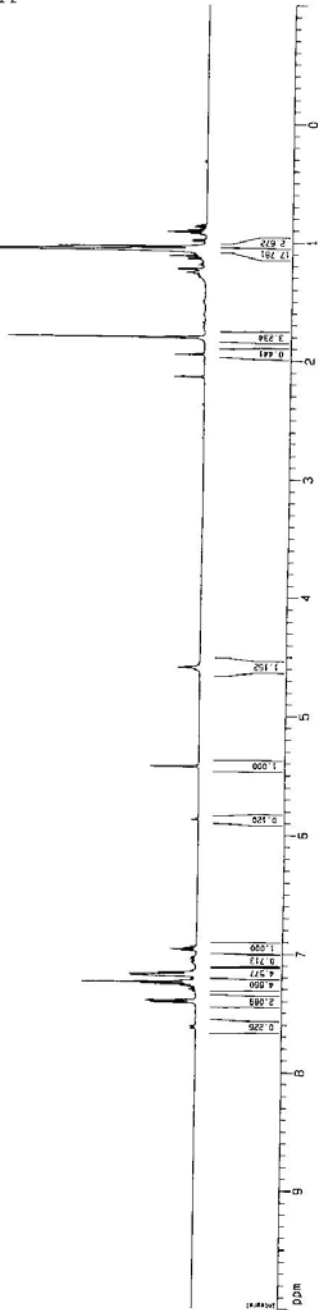





1H of LA4-82-1 8/4/07

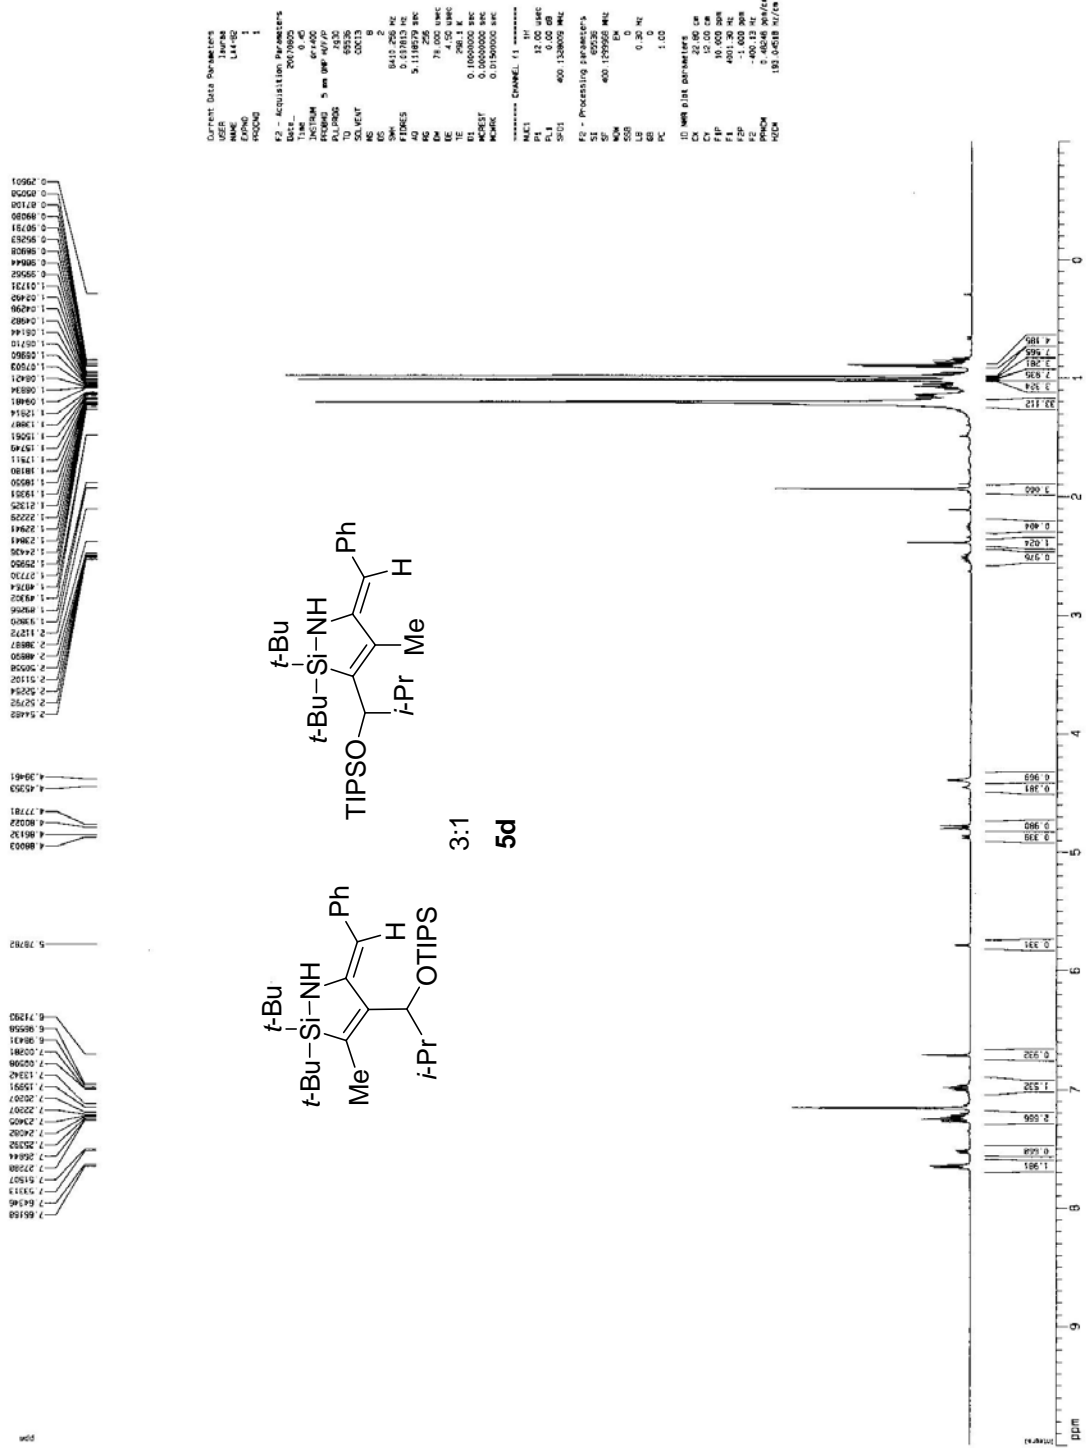

Current Data Parameters  
 Name: LA4-82-1  
 ExpNo: 1  
 F2 - Acquisition Parameters  
 Date\_: 20070802  
 Time: 12:00:00  
 Instrument: spect  
 Processor: 5 mm QNP-1H/1  
 P1: 12.00  
 PL1: 0.00  
 SFO1: 400.13609 MHz  
 F2 - Processing Parameters  
 SI: 65536  
 SF: 400.13609 MHz  
 MD: 32  
 AS: 0  
 GB: 0.30 Hz  
 PC: 1.00  
 D0: 100.000000 sec  
 D1: 1.00  
 D2: 1.00  
 D3: 1.00  
 D4: 1.00  
 D5: 1.00  
 D6: 1.00  
 D7: 1.00  
 D8: 1.00  
 D9: 1.00  
 D10: 1.00  
 D11: 1.00  
 D12: 1.00  
 D13: 1.00  
 D14: 1.00  
 D15: 1.00  
 D16: 1.00  
 D17: 1.00  
 D18: 1.00  
 D19: 1.00  
 D20: 1.00  
 D21: 1.00  
 D22: 1.00  
 D23: 1.00  
 D24: 1.00  
 D25: 1.00  
 D26: 1.00  
 D27: 1.00  
 D28: 1.00  
 D29: 1.00  
 D30: 1.00  
 D31: 1.00  
 D32: 1.00  
 D33: 1.00  
 D34: 1.00  
 D35: 1.00  
 D36: 1.00  
 D37: 1.00  
 D38: 1.00  
 D39: 1.00  
 D40: 1.00  
 D41: 1.00  
 D42: 1.00  
 D43: 1.00  
 D44: 1.00  
 D45: 1.00  
 D46: 1.00  
 D47: 1.00  
 D48: 1.00  
 D49: 1.00  
 D50: 1.00  
 D51: 1.00  
 D52: 1.00  
 D53: 1.00  
 D54: 1.00  
 D55: 1.00  
 D56: 1.00  
 D57: 1.00  
 D58: 1.00  
 D59: 1.00  
 D60: 1.00  
 D61: 1.00  
 D62: 1.00  
 D63: 1.00  
 D64: 1.00  
 D65: 1.00  
 D66: 1.00  
 D67: 1.00  
 D68: 1.00  
 D69: 1.00  
 D70: 1.00  
 D71: 1.00  
 D72: 1.00  
 D73: 1.00  
 D74: 1.00  
 D75: 1.00  
 D76: 1.00  
 D77: 1.00  
 D78: 1.00  
 D79: 1.00  
 D80: 1.00  
 D81: 1.00  
 D82: 1.00  
 D83: 1.00  
 D84: 1.00  
 D85: 1.00  
 D86: 1.00  
 D87: 1.00  
 D88: 1.00  
 D89: 1.00  
 D90: 1.00  
 D91: 1.00  
 D92: 1.00  
 D93: 1.00  
 D94: 1.00  
 D95: 1.00  
 D96: 1.00  
 D97: 1.00  
 D98: 1.00  
 D99: 1.00  
 D100: 1.00  
 D101: 1.00  
 D102: 1.00  
 D103: 1.00  
 D104: 1.00  
 D105: 1.00  
 D106: 1.00  
 D107: 1.00  
 D108: 1.00  
 D109: 1.00  
 D110: 1.00  
 D111: 1.00  
 D112: 1.00  
 D113: 1.00  
 D114: 1.00  
 D115: 1.00  
 D116: 1.00  
 D117: 1.00  
 D118: 1.00  
 D119: 1.00  
 D120: 1.00  
 D121: 1.00  
 D122: 1.00  
 D123: 1.00  
 D124: 1.00  
 D125: 1.00  
 D126: 1.00  
 D127: 1.00  
 D128: 1.00  
 D129: 1.00  
 D130: 1.00  
 D131: 1.00  
 D132: 1.00  
 D133: 1.00  
 D134: 1.00  
 D135: 1.00  
 D136: 1.00  
 D137: 1.00  
 D138: 1.00  
 D139: 1.00  
 D140: 1.00  
 D141: 1.00  
 D142: 1.00  
 D143: 1.00  
 D144: 1.00  
 D145: 1.00  
 D146: 1.00  
 D147: 1.00  
 D148: 1.00  
 D149: 1.00  
 D150: 1.00  
 D151: 1.00  
 D152: 1.00  
 D153: 1.00  
 D154: 1.00  
 D155: 1.00  
 D156: 1.00  
 D157: 1.00  
 D158: 1.00  
 D159: 1.00  
 D160: 1.00  
 D161: 1.00  
 D162: 1.00  
 D163: 1.00  
 D164: 1.00  
 D165: 1.00  
 D166: 1.00  
 D167: 1.00  
 D168: 1.00  
 D169: 1.00  
 D170: 1.00  
 D171: 1.00  
 D172: 1.00  
 D173: 1.00  
 D174: 1.00  
 D175: 1.00  
 D176: 1.00  
 D177: 1.00  
 D178: 1.00  
 D179: 1.00  
 D180: 1.00  
 D181: 1.00  
 D182: 1.00  
 D183: 1.00  
 D184: 1.00  
 D185: 1.00  
 D186: 1.00  
 D187: 1.00  
 D188: 1.00  
 D189: 1.00  
 D190: 1.00  
 D191: 1.00  
 D192: 1.00  
 D193: 1.00  
 D194: 1.00  
 D195: 1.00  
 D196: 1.00  
 D197: 1.00  
 D198: 1.00  
 D199: 1.00  
 D200: 1.00  
 D201: 1.00  
 D202: 1.00  
 D203: 1.00  
 D204: 1.00  
 D205: 1.00  
 D206: 1.00  
 D207: 1.00  
 D208: 1.00  
 D209: 1.00  
 D210: 1.00  
 D211: 1.00  
 D212: 1.00  
 D213: 1.00  
 D214: 1.00  
 D215: 1.00  
 D216: 1.00  
 D217: 1.00  
 D218: 1.00  
 D219: 1.00  
 D220: 1.00  
 D221: 1.00  
 D222: 1.00  
 D223: 1.00  
 D224: 1.00  
 D225: 1.00  
 D226: 1.00  
 D227: 1.00  
 D228: 1.00  
 D229: 1.00  
 D230: 1.00  
 D231: 1.00  
 D232: 1.00  
 D233: 1.00  
 D234: 1.00  
 D235: 1.00  
 D236: 1.00  
 D237: 1.00  
 D238: 1.00  
 D239: 1.00  
 D240: 1.00  
 D241: 1.00  
 D242: 1.00  
 D243: 1.00  
 D244: 1.00  
 D245: 1.00  
 D246: 1.00  
 D247: 1.00  
 D248: 1.00  
 D249: 1.00  
 D250: 1.00  
 D251: 1.00  
 D252: 1.00  
 D253: 1.00  
 D254: 1.00  
 D255: 1.00  
 D256: 1.00  
 D257: 1.00  
 D258: 1.00  
 D259: 1.00  
 D260: 1.00  
 D261: 1.00  
 D262: 1.00  
 D263: 1.00  
 D264: 1.00  
 D265: 1.00  
 D266: 1.00  
 D267: 1.00  
 D268: 1.00  
 D269: 1.00  
 D270: 1.00  
 D271: 1.00  
 D272: 1.00  
 D273: 1.00  
 D274: 1.00  
 D275: 1.00  
 D276: 1.00  
 D277: 1.00  
 D278: 1.00  
 D279: 1.00  
 D280: 1.00  
 D281: 1.00  
 D282: 1.00  
 D283: 1.00  
 D284: 1.00  
 D285: 1.00  
 D286: 1.00  
 D287: 1.00  
 D288: 1.00  
 D289: 1.00  
 D290: 1.00  
 D291: 1.00  
 D292: 1.00  
 D293: 1.00  
 D294: 1.00  
 D295: 1.00  
 D296: 1.00  
 D297: 1.00  
 D298: 1.00  
 D299: 1.00  
 D300: 1.00  
 D301: 1.00  
 D302: 1.00  
 D303: 1.00  
 D304: 1.00  
 D305: 1.00  
 D306: 1.00  
 D307: 1.00  
 D308: 1.00  
 D309: 1.00  
 D310: 1.00  
 D311: 1.00  
 D312: 1.00  
 D313: 1.00  
 D314: 1.00  
 D315: 1.00  
 D316: 1.00  
 D317: 1.00  
 D318: 1.00  
 D319: 1.00  
 D320: 1.00  
 D321: 1.00  
 D322: 1.00  
 D323: 1.00  
 D324: 1.00  
 D325: 1.00  
 D326: 1.00  
 D327: 1.00  
 D328: 1.00  
 D329: 1.00  
 D330: 1.00  
 D331: 1.00  
 D332: 1.00  
 D333: 1.00  
 D334: 1.00  
 D335: 1.00  
 D336: 1.00  
 D337: 1.00  
 D338: 1.00  
 D339: 1.00  
 D340: 1.00  
 D341: 1.00  
 D342: 1.00  
 D343: 1.00  
 D344: 1.00  
 D345: 1.00  
 D346: 1.00  
 D347: 1.00  
 D348: 1.00  
 D349: 1.00  
 D350: 1.00  
 D351: 1.00  
 D352: 1.00  
 D353: 1.00  
 D354: 1.00  
 D355: 1.00  
 D356: 1.00  
 D357: 1.00  
 D358: 1.00  
 D359: 1.00  
 D360: 1.00  
 D361: 1.00  
 D362: 1.00  
 D363: 1.00  
 D364: 1.00  
 D365: 1.00  
 D366: 1.00  
 D367: 1.00  
 D368: 1.00  
 D369: 1.00  
 D370: 1.00  
 D371: 1.00  
 D372: 1.00  
 D373: 1.00  
 D374: 1.00  
 D375: 1.00  
 D376: 1.00  
 D377: 1.00  
 D378: 1.00  
 D379: 1.00  
 D380: 1.00  
 D381: 1.00  
 D382: 1.00  
 D383: 1.00  
 D384: 1.00  
 D385: 1.00  
 D386: 1.00  
 D387: 1.00  
 D388: 1.00  
 D389: 1.00  
 D390: 1.00  
 D391: 1.00  
 D392: 1.00  
 D393: 1.00  
 D394: 1.00  
 D395: 1.00  
 D396: 1.00  
 D397: 1.00  
 D398: 1.00  
 D399: 1.00  
 D400: 1.00  
 D401: 1.00  
 D402: 1.00  
 D403: 1.00  
 D404: 1.00  
 D405: 1.00  
 D406: 1.00  
 D407: 1.00  
 D408: 1.00  
 D409: 1.00  
 D410: 1.00  
 D411: 1.00  
 D412: 1.00  
 D413: 1.00  
 D414: 1.00  
 D415: 1.00  
 D416: 1.00  
 D417: 1.00  
 D418: 1.00  
 D419: 1.00  
 D420: 1.00  
 D421: 1.00  
 D422: 1.00  
 D423: 1.00  
 D424: 1.00  
 D425: 1.00  
 D426: 1.00  
 D427: 1.00  
 D428: 1.00  
 D429: 1.00  
 D430: 1.00  
 D431: 1.00  
 D432: 1.00  
 D433: 1.00  
 D434: 1.00  
 D435: 1.00  
 D436: 1.00  
 D437: 1.00  
 D438: 1.00  
 D439: 1.00  
 D440: 1.00  
 D441: 1.00  
 D442: 1.00  
 D443: 1.00  
 D444: 1.00  
 D445: 1.00  
 D446: 1.00  
 D447: 1.00  
 D448: 1.00  
 D449: 1.00  
 D450: 1.00  
 D451: 1.00  
 D452: 1.00  
 D453: 1.00  
 D454: 1.00  
 D455: 1.00  
 D456: 1.00  
 D457: 1.00  
 D458: 1.00  
 D459: 1.00  
 D460: 1.00  
 D461: 1.00  
 D462: 1.00  
 D463: 1.00  
 D464: 1.00  
 D465: 1.00  
 D466: 1.00  
 D467: 1.00  
 D468: 1.00  
 D469: 1.00  
 D470: 1.00  
 D471: 1.00  
 D472: 1.00  
 D473: 1.00  
 D474: 1.00  
 D475: 1.00  
 D476: 1.00  
 D477: 1.00  
 D478: 1.00  
 D479: 1.00  
 D480: 1.00  
 D481: 1.00  
 D482: 1.00  
 D483: 1.00  
 D484: 1.00  
 D485: 1.00  
 D486: 1.00  
 D487: 1.00  
 D488: 1.00  
 D489: 1.00  
 D490: 1.00  
 D491: 1.00  
 D492: 1.00  
 D493: 1.00  
 D494: 1.00  
 D495: 1.00  
 D496: 1.00  
 D497: 1.00  
 D498: 1.00  
 D499: 1.00  
 D500: 1.00  
 D501: 1.00  
 D502: 1.00  
 D503: 1.00  
 D504: 1.00  
 D505: 1.00  
 D506: 1.00  
 D507: 1.00  
 D508: 1.00  
 D509: 1.00  
 D510: 1.00  
 D511: 1.00  
 D512: 1.00  
 D513: 1.00  
 D514: 1.00  
 D515: 1.00  
 D516: 1.00  
 D517: 1.00  
 D518: 1.00  
 D519: 1.00  
 D520: 1.00  
 D521: 1.00  
 D522: 1.00  
 D523: 1.00  
 D524: 1.00  
 D525: 1.00  
 D526: 1.00  
 D527: 1.00  
 D528: 1.00  
 D529: 1.00  
 D530: 1.00  
 D531: 1.00  
 D532: 1.00  
 D533: 1.00  
 D534: 1.00  
 D535: 1.00  
 D536: 1.00  
 D537: 1.00  
 D538: 1.00  
 D539: 1.00  
 D540: 1.00  
 D541: 1.00  
 D542: 1.00  
 D543: 1.00  
 D544: 1.00  
 D545: 1.00  
 D546: 1.00  
 D547: 1.00  
 D548: 1.00  
 D549: 1.00  
 D550: 1.00  
 D551: 1.00  
 D552: 1.00  
 D553: 1.00  
 D554: 1.00  
 D555: 1.00  
 D556: 1.00  
 D557: 1.00  
 D558: 1.00  
 D559: 1.00  
 D560: 1.00  
 D561: 1.00  
 D562: 1.00  
 D563: 1.00  
 D564: 1.00  
 D565: 1.00  
 D566: 1.00  
 D567: 1.00  
 D568: 1.00  
 D569: 1.00  
 D570: 1.00  
 D571: 1.00  
 D572: 1.00  
 D573: 1.00  
 D574: 1.00  
 D575: 1.00  
 D576: 1.00  
 D577: 1.00  
 D578: 1.00  
 D579: 1.00  
 D580: 1.00  
 D581: 1.00  
 D582: 1.00  
 D583: 1.00  
 D584: 1.00  
 D585: 1.00  
 D586: 1.00  
 D587: 1.00  
 D588: 1.00  
 D589: 1.00  
 D590: 1.00  
 D591: 1.00  
 D592: 1.00  
 D593: 1.00  
 D594: 1.00  
 D595: 1.00  
 D596: 1.00  
 D597: 1.00  
 D598: 1.00  
 D599: 1.00  
 D600: 1.00  
 D601: 1.00  
 D602: 1.00  
 D603: 1.00  
 D604: 1.00  
 D605: 1.00  
 D606: 1.00  
 D607: 1.00  
 D608: 1.00  
 D609: 1.00  
 D610: 1.00  
 D611: 1.00  
 D612: 1.00  
 D613: 1.00  
 D614: 1.00  
 D615: 1.00  
 D616: 1.00  
 D617: 1.00  
 D618: 1.00  
 D619: 1.00  
 D620: 1.00  
 D621: 1.00  
 D622: 1.00  
 D623: 1.00  
 D624: 1.00  
 D625: 1.00  
 D626: 1.00  
 D627: 1.00  
 D628: 1.00  
 D629: 1.00  
 D630: 1.00  
 D631: 1.00  
 D632: 1.00  
 D633: 1.00  
 D634: 1.00  
 D635: 1.00  
 D636: 1.00  
 D637: 1.00  
 D638: 1.00  
 D639: 1.00  
 D640: 1.00  
 D641: 1.00  
 D642: 1.00  
 D643: 1.00  
 D644: 1.00  
 D645: 1.00  
 D646: 1.00  
 D647: 1.00  
 D648: 1.00  
 D649: 1.00  
 D650: 1.00  
 D651: 1.00  
 D652: 1.00  
 D653: 1.00  
 D654: 1.00  
 D655: 1.00  
 D656: 1.00  
 D657: 1.00  
 D658: 1.00  
 D659: 1.00  
 D660: 1.00  
 D661: 1.00  
 D662: 1.00  
 D663: 1.00  
 D664: 1.00  
 D665: 1.00  
 D666: 1.00  
 D667: 1.00  
 D668: 1.00  
 D669: 1.00  
 D670: 1.00  
 D671: 1.00  
 D672: 1.00  
 D673: 1.00  
 D674: 1.00  
 D675: 1.00  
 D676: 1.00  
 D677: 1.00  
 D678: 1.00  
 D679: 1.00  
 D680: 1.00  
 D681: 1.00  
 D682: 1.00  
 D683: 1.00  
 D684: 1.00  
 D685: 1.00  
 D686: 1.00  
 D687: 1.00  
 D688: 1.00  
 D689: 1.00  
 D690: 1.00  
 D691: 1.00  
 D692: 1.00  
 D693: 1.00  
 D694: 1.00  
 D695: 1.00  
 D696: 1.00  
 D697: 1.00  
 D698: 1.00  
 D699: 1.00  
 D700: 1.00  
 D701: 1.00  
 D702: 1.00  
 D703: 1.00  
 D704: 1.00  
 D705: 1.00  
 D706: 1.00  
 D707: 1.00  
 D708: 1.00  
 D709: 1.00  
 D710: 1.00  
 D711: 1.00  
 D712: 1.00  
 D713: 1.00  
 D714: 1.00  
 D715: 1.00  
 D716: 1.00  
 D717: 1.00  
 D718: 1.00  
 D719: 1.00  
 D720: 1.00  
 D721: 1.00  
 D722: 1.00  
 D723: 1.00  
 D724: 1.00  
 D725: 1.00  
 D726: 1.00  
 D727: 1.00  
 D728: 1.00  
 D729: 1.00  
 D730: 1.00  
 D731: 1.00  
 D732: 1.00  
 D733: 1.00  
 D734: 1.00  
 D735: 1.00  
 D736: 1.00  
 D737: 1.00  
 D738: 1.00  
 D739: 1.00  
 D740: 1.00  
 D741: 1.00  
 D742: 1.00  
 D743: 1.00  
 D744: 1.00  
 D745: 1.00  
 D746: 1.00  
 D747: 1.00  
 D748: 1.00  
 D749: 1.00  
 D750: 1.00  
 D751: 1.00  
 D752: 1.00  
 D753: 1.00  
 D754: 1.00  
 D755: 1.00  
 D756: 1.00  
 D757: 1.00  
 D758: 1.00  
 D759: 1.00  
 D760: 1.00  
 D761: 1.00  
 D762: 1.00  
 D763: 1.00  
 D764: 1.00  
 D765: 1.00  
 D766: 1.00  
 D767: 1.00  
 D768: 1.00  
 D769: 1.00  
 D770: 1.00  
 D771: 1.00  
 D772: 1.00  
 D773: 1.00  
 D774: 1.00  
 D775: 1.00  
 D776: 1.00  
 D777: 1.00  
 D778: 1.00  
 D779: 1.00  
 D780: 1.00  
 D781: 1.00  
 D782: 1.00  
 D783: 1.00  
 D784: 1.00  
 D785: 1.00  
 D786: 1.00  
 D787: 1.00  
 D788: 1.00  
 D789: 1.00  
 D790: 1.00  
 D791: 1.00  
 D792: 1.00  
 D793: 1.00  
 D794: 1.00  
 D795: 1.00  
 D796: 1.00  
 D797: 1.00  
 D798: 1.00  
 D799: 1.00  
 D800: 1.00  
 D801: 1.00  
 D802: 1.00  
 D803: 1.00  
 D804: 1.00  
 D805: 1.00  
 D806: 1.00  
 D807: 1.00  
 D808: 1.00  
 D809: 1.00  
 D810: 1.00  
 D811: 1.00  
 D812: 1.00  
 D813: 1.00  
 D814: 1.00  
 D815: 1.00  
 D816: 1.00  
 D817: 1.00  
 D818: 1.00  
 D819: 1.00  
 D820: 1.00  
 D821: 1.00  
 D822: 1.00  
 D823: 1.00  
 D824: 1.00  
 D825: 1.00  
 D826: 1.00  
 D827: 1.00  
 D828: 1.00  
 D829: 1.00  
 D830: 1.00  
 D831: 1.00  
 D832: 1.00  
 D833: 1.00  
 D834: 1.00  
 D835: 1.00  
 D836: 1.00  
 D837: 1.00  
 D838: 1.00  
 D839: 1.00  
 D840: 1.00  
 D841: 1.00  
 D842: 1.00  
 D843: 1.00  
 D844: 1.00  
 D845: 1.00  
 D846: 1.00  
 D847: 1.00  
 D848: 1.00  
 D849: 1.00  
 D850: 1.00  
 D851: 1.00







1H of LA4-52-3 the rest 7/20/07

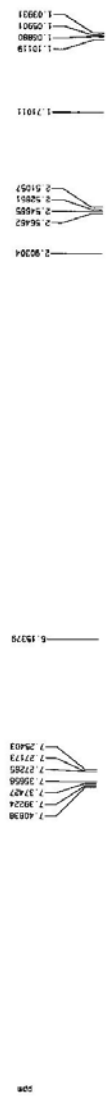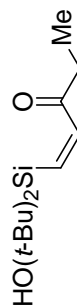

S-4

```

Current Data Parameters
NAME          Laura
EXPNO        1
PROCNO       1
PROCRES      1
Date_         20070720
Time         22.55
PULPROG      zgpg30
PCPDPRG2     0
PCPDPRG1     0
TO          65535
AQ          0.0119
RG          327.5
SI          2
SF          400.1362600 MHz
WDW          EM
SSB          0
LB           0.30 Hz
GB           0
PC           1.00

***** CHANNEL f1 *****
NUC1         1H
P1           12.00 usec
PL           0.00 dB
SFO1         400.1362600 MHz

F2 - Acquisition Parameters
SI          65535
SF          400.1362600 MHz
WDW          EM
SSB          0
LB           0.30 Hz
GB           0
PC           1.00

2D NMR Data Parameters
SI          65535
SF          400.1362600 MHz
WDW          EM
SSB          0
LB           0.30 Hz
GB           0
PC           1.00
    
```

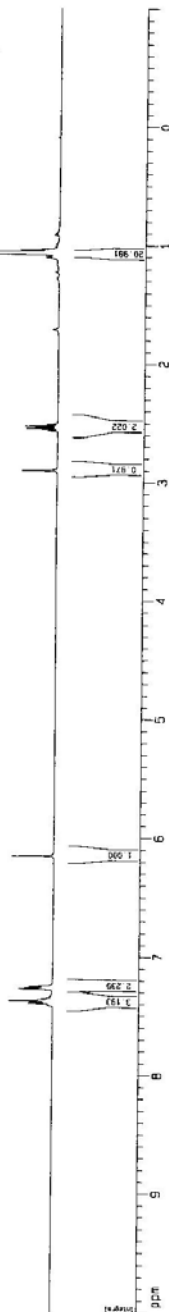

1H of LA4-53-5 7/24/07

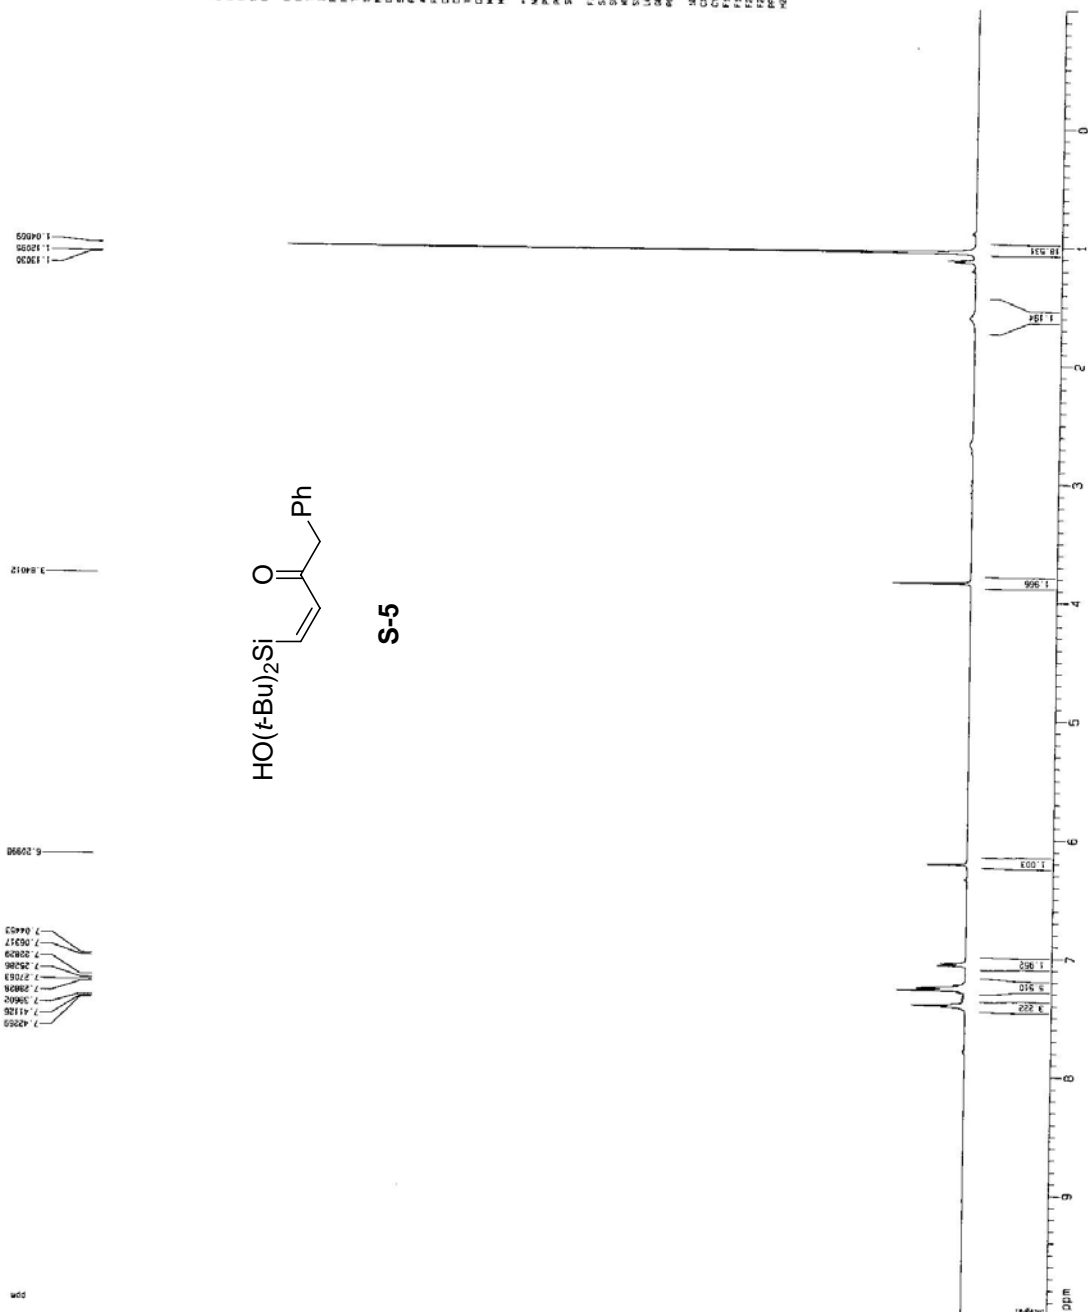

Current Data Parameters  
 USP: Jsmm  
 Lvl: 3.1  
 PRGNO: 1  
 F2 - Acquisition Parameters  
 Date\_: 00/19/04  
 Time: 22.54  
 VOLTAGE: 1000  
 PULPROG: 5 MR GPP 49.50  
 SOLVENT: CDCl3  
 NS: 4  
 DS: 2  
 SWH: 6145.942 Hz  
 FIDRES: 0.20013 Hz  
 AQ: 5.1118573 Hz  
 RG: 393.2  
 ZN: 78  
 DE: 4.50 VPHAS  
 TE: 298.2 K  
 T2RHO: 0.24540000000000000  
 MCH317: 0.24000000000000000  
 MCH318: 0.24000000000000000  
 MCH319: 0.24000000000000000  
 \*\*\*\*\* CHANNEL f1 \*\*\*\*\*  
 NUC1: 1H  
 P1: 12.00 uS  
 PL1: 0.00 dB  
 SFO1: 400.1300015 MHz  
 F2 - Processing parameters  
 SI: 65536  
 SF: 400.1300174 MHz  
 SD: 0  
 SSB: 0  
 LB: 0.30 Hz  
 GB: 0  
 PC: 1.00  
 JD: WINEFIT Parameters  
 SI: 65536  
 SF: 400.1300174 MHz  
 CT: 12.00 uS  
 EP: 10.000 dB  
 FPP: 400.1300174 MHz  
 FSP: 400.1300174 MHz  
 F2: -ANG: 1.3 Hz  
 BRACK: 0.48248 Hz/Ch  
 PROC: 131.144818 Hz/Ch

<sup>1</sup>H of LA5-106-5 hydrolysis 6/26/08

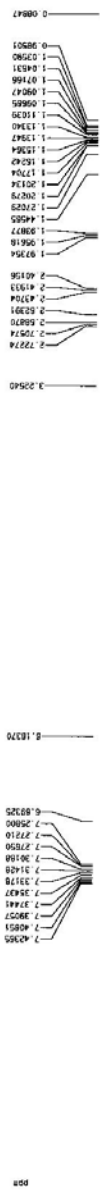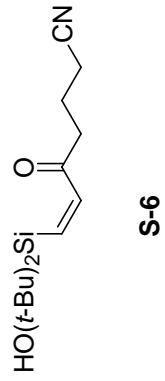

Current Data Parameters  
 USER: jhu/aa  
 NAME: LA5-106  
 PROCNO: 1  
 F2 - Acquisition Parameters  
 Date\_UTC: 20080626  
 Time: 21.52  
 INSTRUM: spect  
 PULPROG: zgpg30  
 TO: 600.25  
 FROM: 0.000000  
 NS: 655  
 DS: 2  
 SWH: 6145.2  
 FWHM: 0.140750 Hz  
 AQ: 5.1118079 Hz  
 RG: 64  
 GB: 0  
 DE: 4.50 Hz  
 TE: 298.2 K  
 DRY: 0  
 MCH: 0.6000000 sec  
 MCK: 0.61000000 sec  
 \*\*\*\*\* CHANNEL f1 \*\*\*\*\*  
 NUC1: 1H  
 P1: 12.00 usec  
 PL1: 0.00 dB  
 SFO1: 400.1300000 MHz  
 F2 - Processing parameters  
 SI: 655  
 SF: 400.1300000 MHz  
 DS: 2  
 SW: 6145.2  
 GB: 0  
 DE: 4.50 Hz  
 TE: 298.2 K  
 F0: 0.00000000 MHz  
 1D NMR orbit parameters  
 ORBIT: 0  
 CY: 50.00 Hz  
 F1P: 15.0000000 MHz  
 F2P: 400.1300000 MHz  
 F3: 0.00000000 MHz  
 F4: 0.00000000 MHz  
 PWDCH: 0.40000000 V  
 PWDW: 350.0000000 Hz

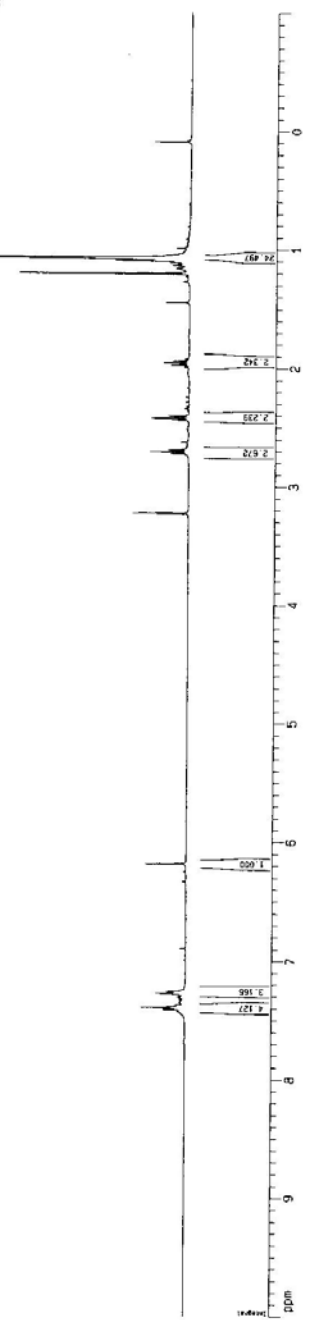

1H of LA5-15B-3 6/21/08

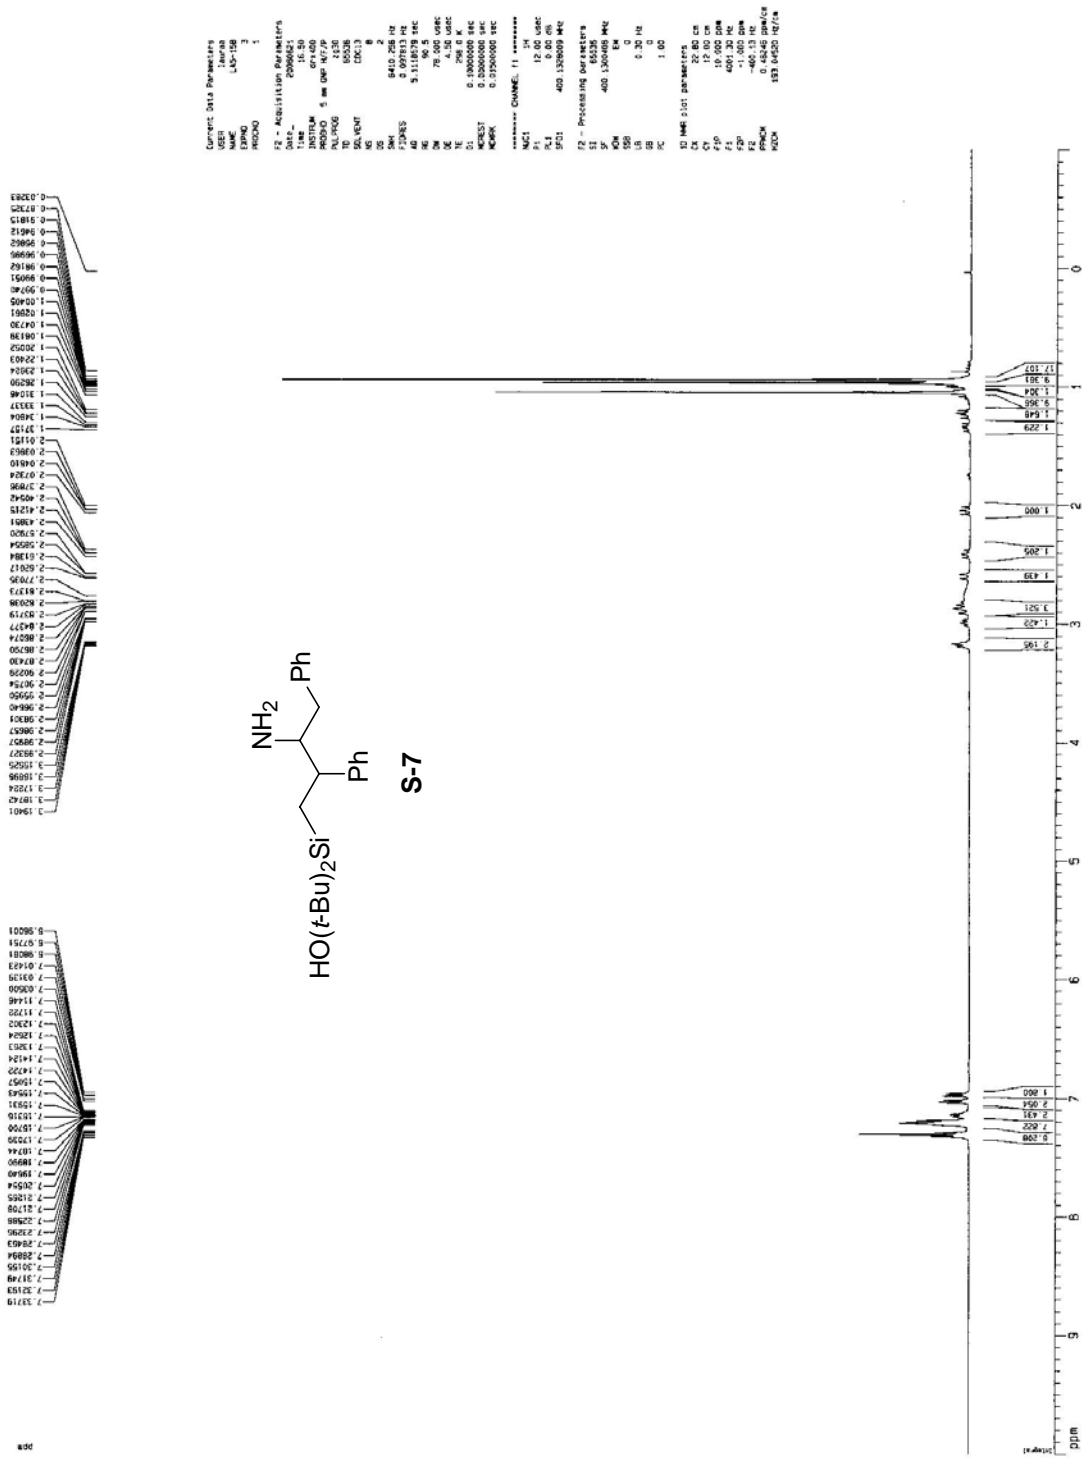

1H of LA4-87-2

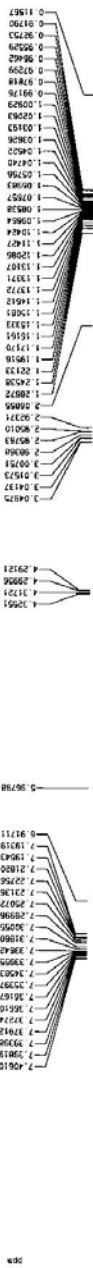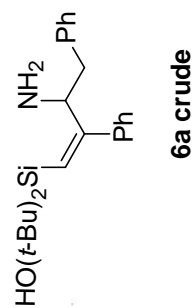

```

Current Data Parameters
NAME      LA4-87-2
EXPNO    2
PROCNO   1
F2 - Acquisition Parameters
Date_     20070808
Time      14.40
INSTRUM  spect
PROBHD   5 mm QNP 1H/1
PULPROG  zgpg30
TD        65536
SOLVENT  CDCl3
DS        4
SWH       6419.250 Hz
FIDRES   0.201013 Hz
AQ        0.1111111 sec
RG         32
WDW       EM
SSB       0
LB        3.00 Hz
GB        0
PC        1.0000000 sec
DQ        0.1000000 sec
MORPH    0
AQ2       0.1000000 sec
RG2        32
WDW2       EM
SSB2       0
LB2        3.00 Hz
GB2        0
PC2        1.0000000 sec
***** CHANNEL f1 *****
NUC1      13C
P1         12.00 V
PL1        0.00 dB
SFO1      400.1326000 MHz
F2 - Processing parameters
SI         32768
SF         400.1326000 MHz
WDW        EM
SSB        0
LB         3.00 Hz
GB         0
PC         1.0000000 sec
DQ         0.1000000 sec
MORPH      0
AQ2        0.1000000 sec
RG2        32
WDW2       EM
SSB2       0
LB2        3.00 Hz
GB2        0
PC2        1.0000000 sec
ID NAME D101 Parameters
SI         32768
SF         400.1326000 MHz
WDW        EM
SSB        0
LB         3.00 Hz
GB         0
PC         1.0000000 sec
DQ         0.1000000 sec
MORPH      0
AQ2        0.1000000 sec
RG2        32
WDW2       EM
SSB2       0
LB2        3.00 Hz
GB2        0
PC2        1.0000000 sec

```

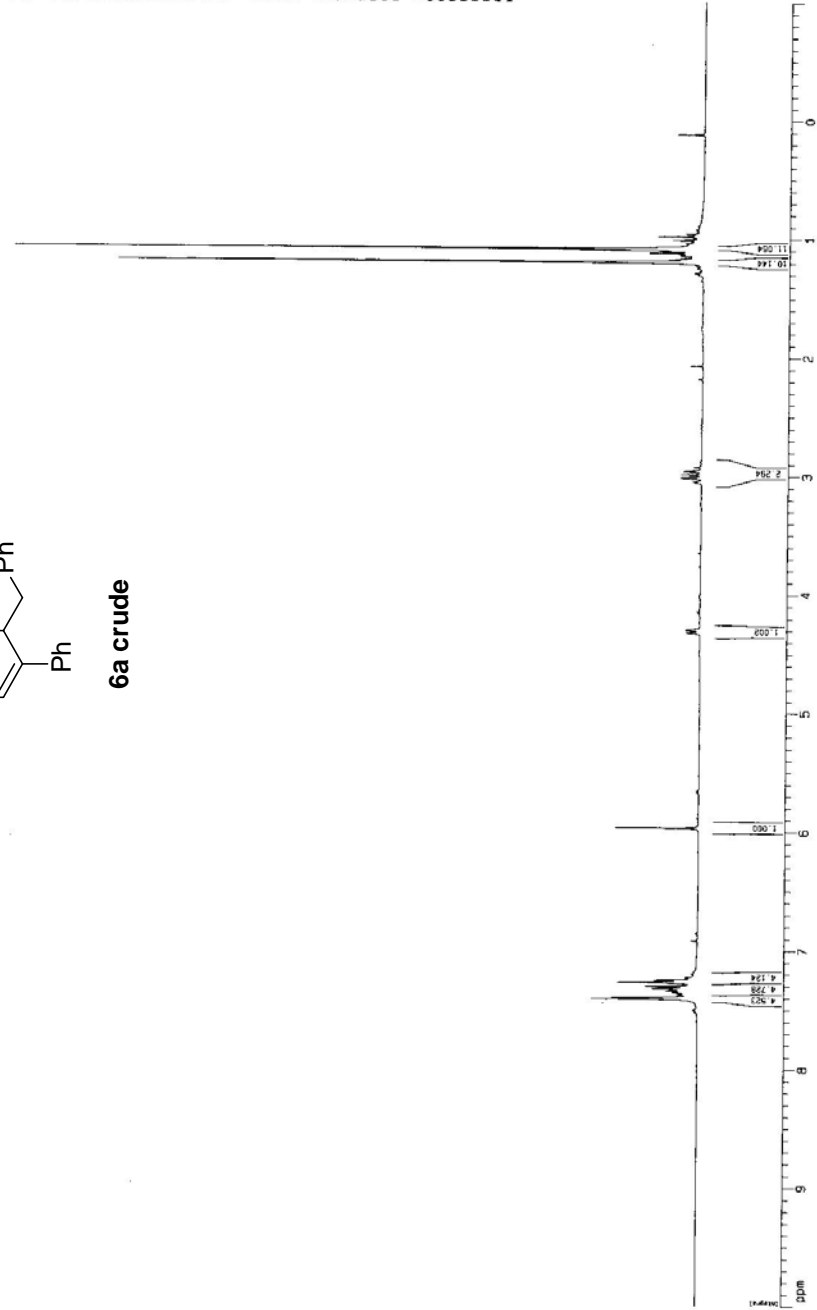

1H of LA4-75-2 7/31/07

500

7.9907  
7.9782  
7.9773  
7.9654  
7.9500  
7.9562  
7.9464  
7.9300  
7.9288  
7.9176

5.8474

4.2887  
4.3199  
4.2887

3.0283  
3.0263  
3.0178  
2.9868  
2.9859  
2.9846  
2.9839  
2.9842

1.1795  
1.0684  
1.0581  
1.0172

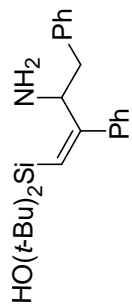

**6a purified**

Current Data Parameters  
 Name LA4-75  
 EXPNO 2  
 PROCNO 1  
 F2 - Acquisition Parameters  
 Date\_ 20070731  
 Time 17:51:02  
 INSTRUM 5  
 PROBHD 5 mm QNP 1H/13  
 PULPROG zgpg30  
 TD 65536  
 SOLVENT CDCl3  
 NS 8  
 DS 2  
 SWH 8410.256 Hz  
 F1RES 0.197813 Hz  
 SF 101.625175 MHz  
 AQ 1.847175 Sec  
 DE 78.000 uJiac  
 TE 300.2 K  
 D1 0.10000000 Sec  
 D11 0.02000000 Sec  
 ACQRES 0.00000000 Sec  
 AQRES 0.00000000 Sec  
 \*\*\*\*\* CHANNEL f1 \*\*\*\*\*  
 NU1 13  
 PC1 12.30 uJiac  
 TX 1 0.00 dB  
 SF11 400.1362690 MHz  
 F2 - Processing parameters  
 SI 65536  
 SF 400.1362690 MHz  
 AQB 0  
 SQB 0  
 CB 0.10 Hz  
 ZF 0  
 PC 1.00  
 TD 1MS D111 200umeters  
 C1 32.66 cm  
 C2 12.05 cm  
 F1 400.136269 MHz  
 F2 -1.002 2000  
 GPCZ 0  
 HNAME C  
 INDCM 180 0.4518 Hz/cm

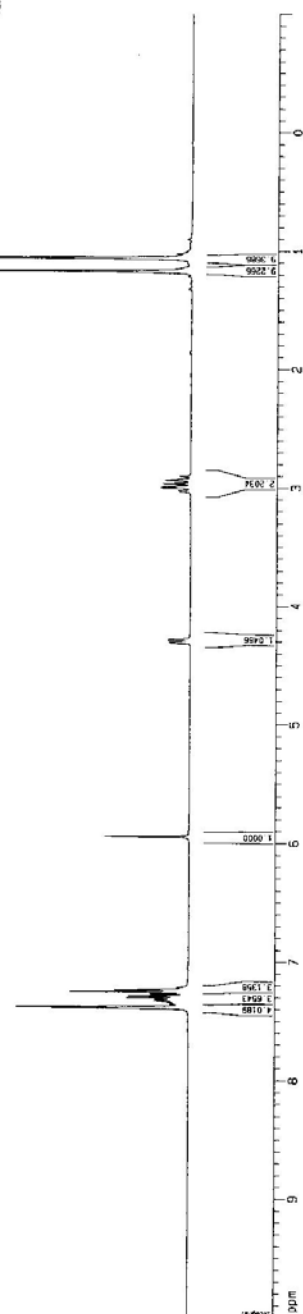

1H of LA5-144-1 6/14/08

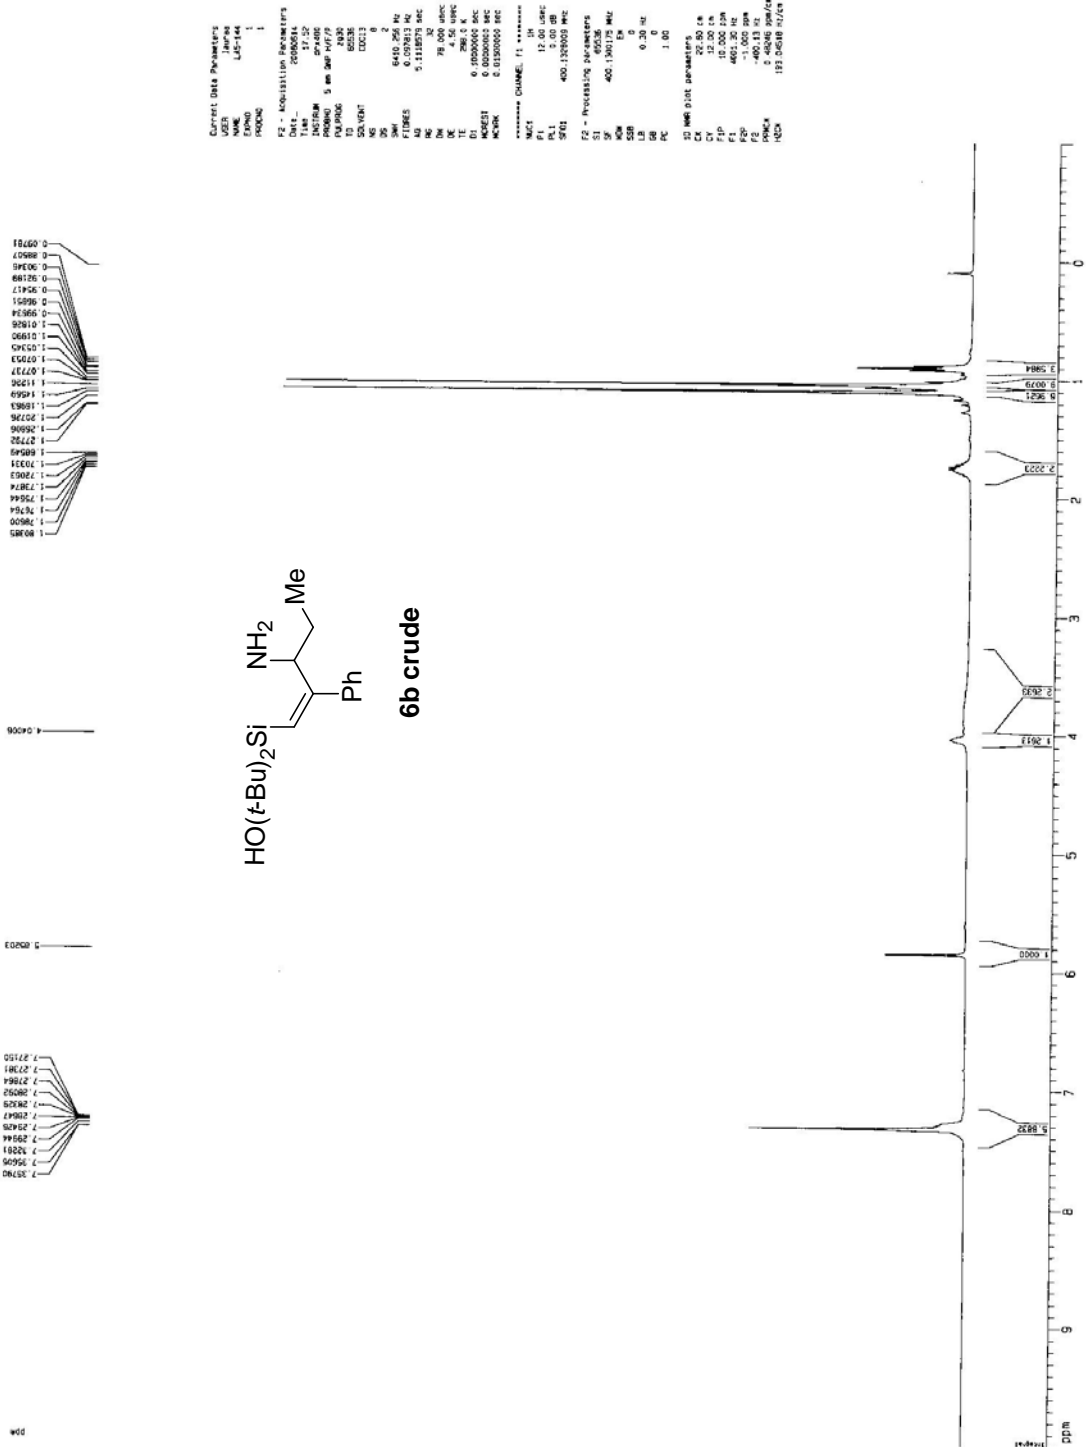





1H of LA5-64-8 4/26/08

ppm

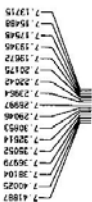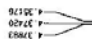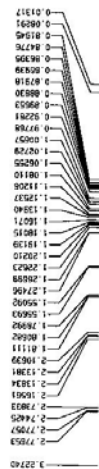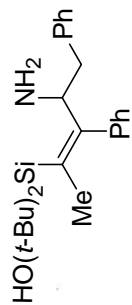

6c crude

Current Data Parameters  
NAME LA5-64  
EXPNO 8  
PROCNO 1  
F2 - Acquisition Parameters  
Time 05:08:57  
INSTRUM spect  
PROBHD 5 mm QNP 1H/1  
PULPROG zgpg30  
TD 65536  
SOLVENT CDCl<sub>3</sub>  
AQ 2  
RG 2  
SI 6416.296 Hz  
FIDRES 0.118079 Hz  
AQRES 0.061  
RG 2  
SI 79.000 MHz  
TE 300.2 K  
D1 1.0000000 sec  
D11 0.0200000 sec  
D12 0.0500000 sec  
D13 0.1500000 sec  
SFO 400.1362000 MHz  
AQRES 0.061  
NAMEC (1) \*\*\*\*\*  
NAMEC (2) \*\*\*\*\*  
NAMEC (3) \*\*\*\*\*  
P1 12.00000000 sec  
P2 0.50000000 sec  
P3 0.50000000 sec  
SFO 400.1362000 MHz  
F2 - Processing parameters  
SI 65536  
SF 400.1362000 MHz  
WDW EM  
SSB 0  
GB 0  
PC 1.00  
SC 0  
CC 28.86 deg  
CD 15.00000000 deg  
FIP 4001.36200000 Hz  
FI 15.00000000 deg  
F2 400.1362000000 MHz  
F3 15.00000000 deg  
FRMCH 0  
FREQ 400.1362000000 MHz  
NUC1 13C

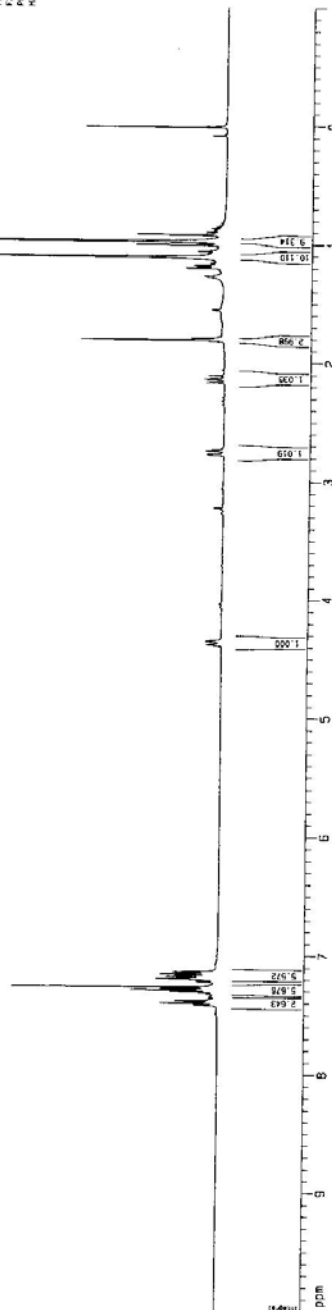

<sup>1</sup>H NMR LA5-64-3 4/25/08

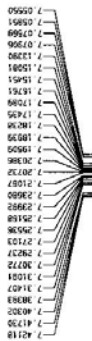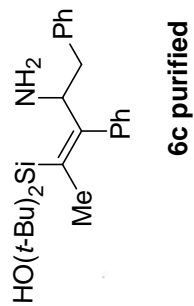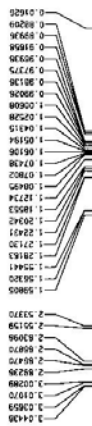

```
Current Data Parameters
NAME      LA5-64
PROCNO    3
PROC      1
F2 - Acquisition Parameters
Date_     2008.03.19.01
Time      12:40:50
INSTRUM   spect
PULPROG   zgpg30
PROBHD    5 mm QNP 1H/13
TD        65536
SOLVENT   CDCl3
DS         2
SWH       6412.206 Hz
FIDRES    0.110000000 Hz
AQ        5.111000000 sec
RG        128
WDW        EM
SSB        0
LB         78.000 Hz
GB         0
PC         2.00
D0         0.100000000 sec
DELTA     2.986100000 sec
MORPHY    0.010000000 sec
***** CHANNEL f1 *****
NUC1       13C
P1         12.00000000 sec
PL1        0.00000000 dB
SFO1       400.132000000 MHz
F2 - Processing parameters
SI         400.132001700 MHz
SF         400.132001700 MHz
WDW        EM
SSB        0
LB         0.35000000 Hz
GB         0
PC         2.00
D0         0.000000000 sec
RG        65536
WDW        EM
SSB        0
LB         0.35000000 Hz
GB         0
PC         2.00
F2 Name D111.DAMPNLET17
SI         23.00000000 MHz
SF         23.00000000 MHz
WDW        EM
SSB        0
LB         0.35000000 Hz
GB         0
PC         2.00
F2 Name D111.DAMPNLET17
SI         1.000000000 MHz
SF         1.000000000 MHz
WDW        EM
SSB        0
LB         0.400000000 Hz
GB         0
PC         2.00
F2 Name D111.DAMPNLET17
SI         100.625000000 MHz
SF         100.625000000 MHz
WDW        EM
SSB        0
LB         0.400000000 Hz
GB         0
PC         2.00
```

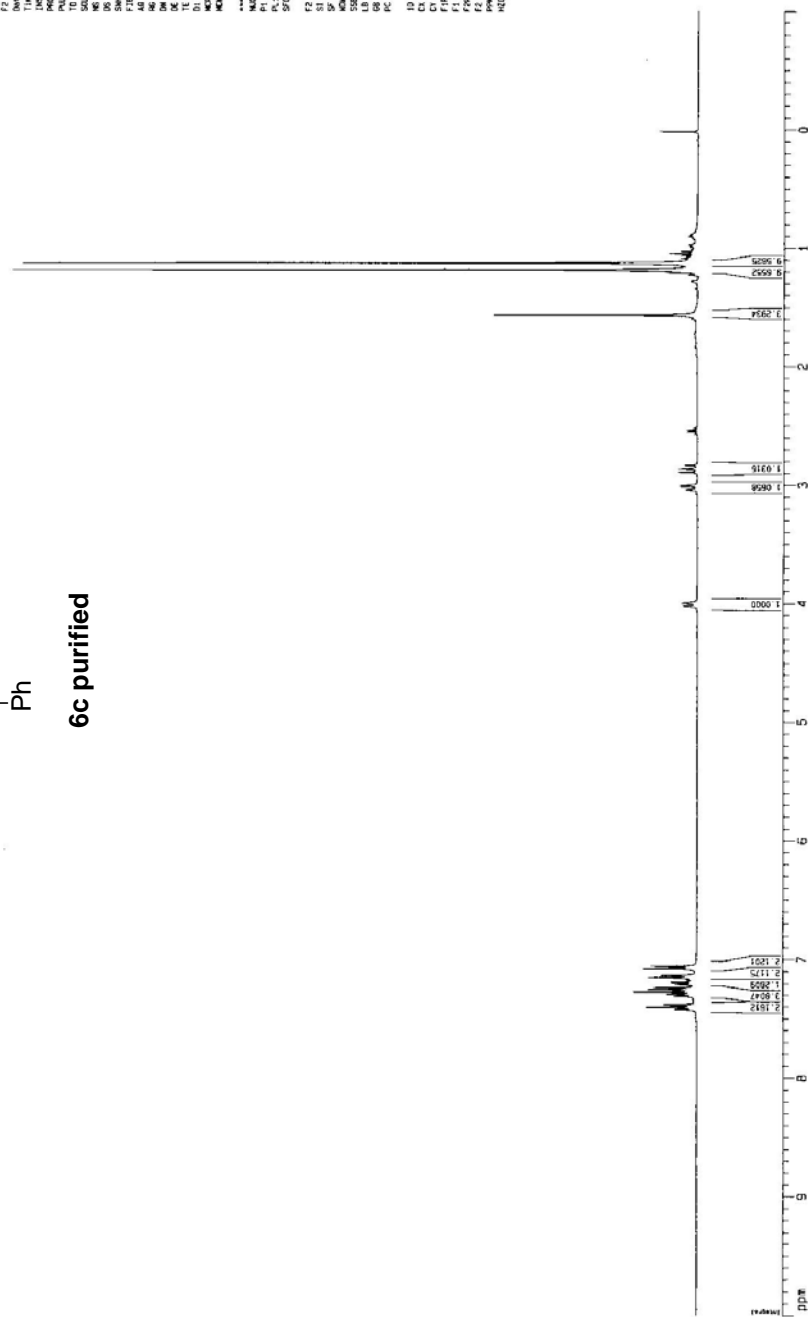



<sup>1</sup>H of LA4-138-4 2/B/08

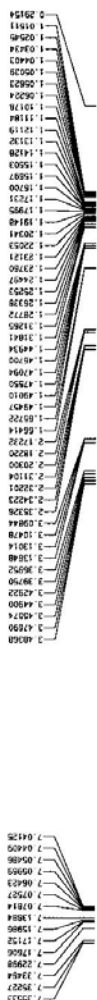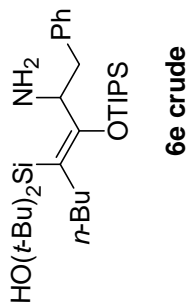

Current Data Parameters  
 USER: jmurphy  
 NAME: LA4-138  
 EXPNO: 4  
 PROCNO: 1

F2 - Acquisition Parameters  
 Date\_UTC: 20081103  
 Time: 09:33  
 INSTRUM: spect  
 PULPROG: zgpg30  
 PROCNO: 5  
 NP: 65536  
 TO: 65535  
 SOLVENT: CDCl3  
 DS: 4  
 SWH: 6430.256 Hz  
 FIDRES: 0.1771613 Hz  
 AQ: 5.1148018 sec  
 RG: 96.5  
 SR: 78.500 MHz  
 DQ: 2.9811827  
 TE: 300.2 K  
 DE: 0.1000000 sec  
 DD: 0.0100000 sec  
 MONOPH: 0.0100000 sec  
 AQS: \*\*\*\*\* CHANNEL f1 \*\*\*\*\*  
 NUC1: 13C  
 P1: 12.00 usec  
 PL1: 0.00 dB  
 SFO1: 400.1260000 MHz  
 F2 - Processing parameters  
 SI: 65536  
 SF: 400.1260000 MHz  
 DSF: 400.1260000 MHz  
 SB: 5M  
 LB: 0.30 Hz  
 GB: 0  
 HB: 0  
 IC: 1.00

D0 NMR 3101 PARAMETERS  
 CA: 20.86 deg  
 F2: 400.1260000 MHz  
 F1P: 10.0000000 MHz  
 F1: 400.1260000 MHz  
 F2P: 10.0000000 MHz  
 F3: 10.0000000 MHz  
 PWDW4: 5.0000000 sec  
 PWDW6: 10.0000000 sec  
 PWDW8: 10.0000000 sec  
 PWDW9: 10.0000000 sec  
 PWDW0: 10.0000000 sec

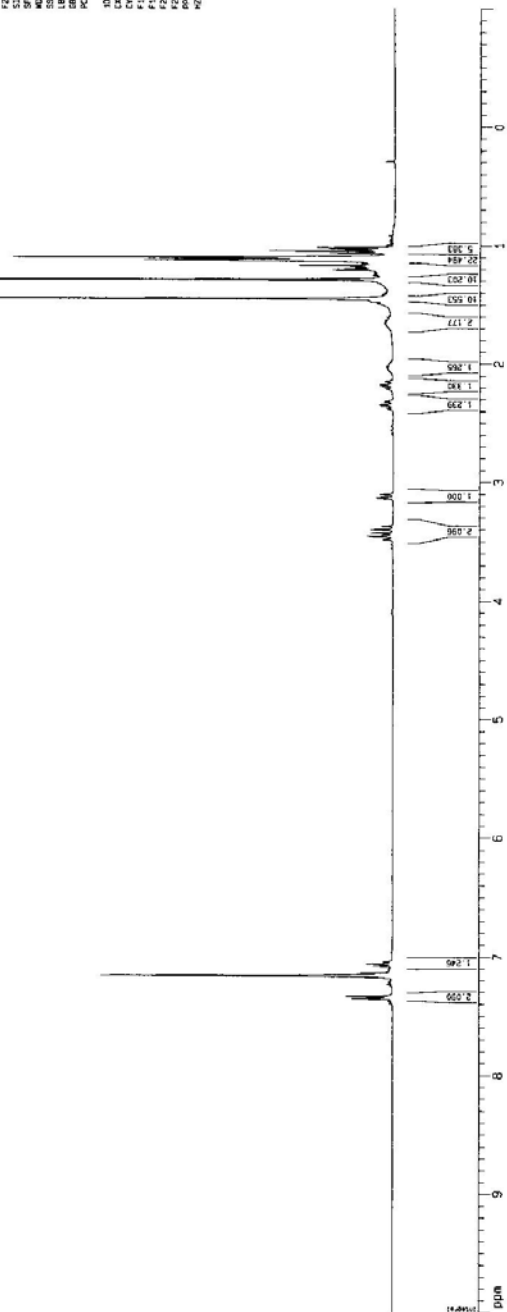



1H of LA5-107-3 6/15/08

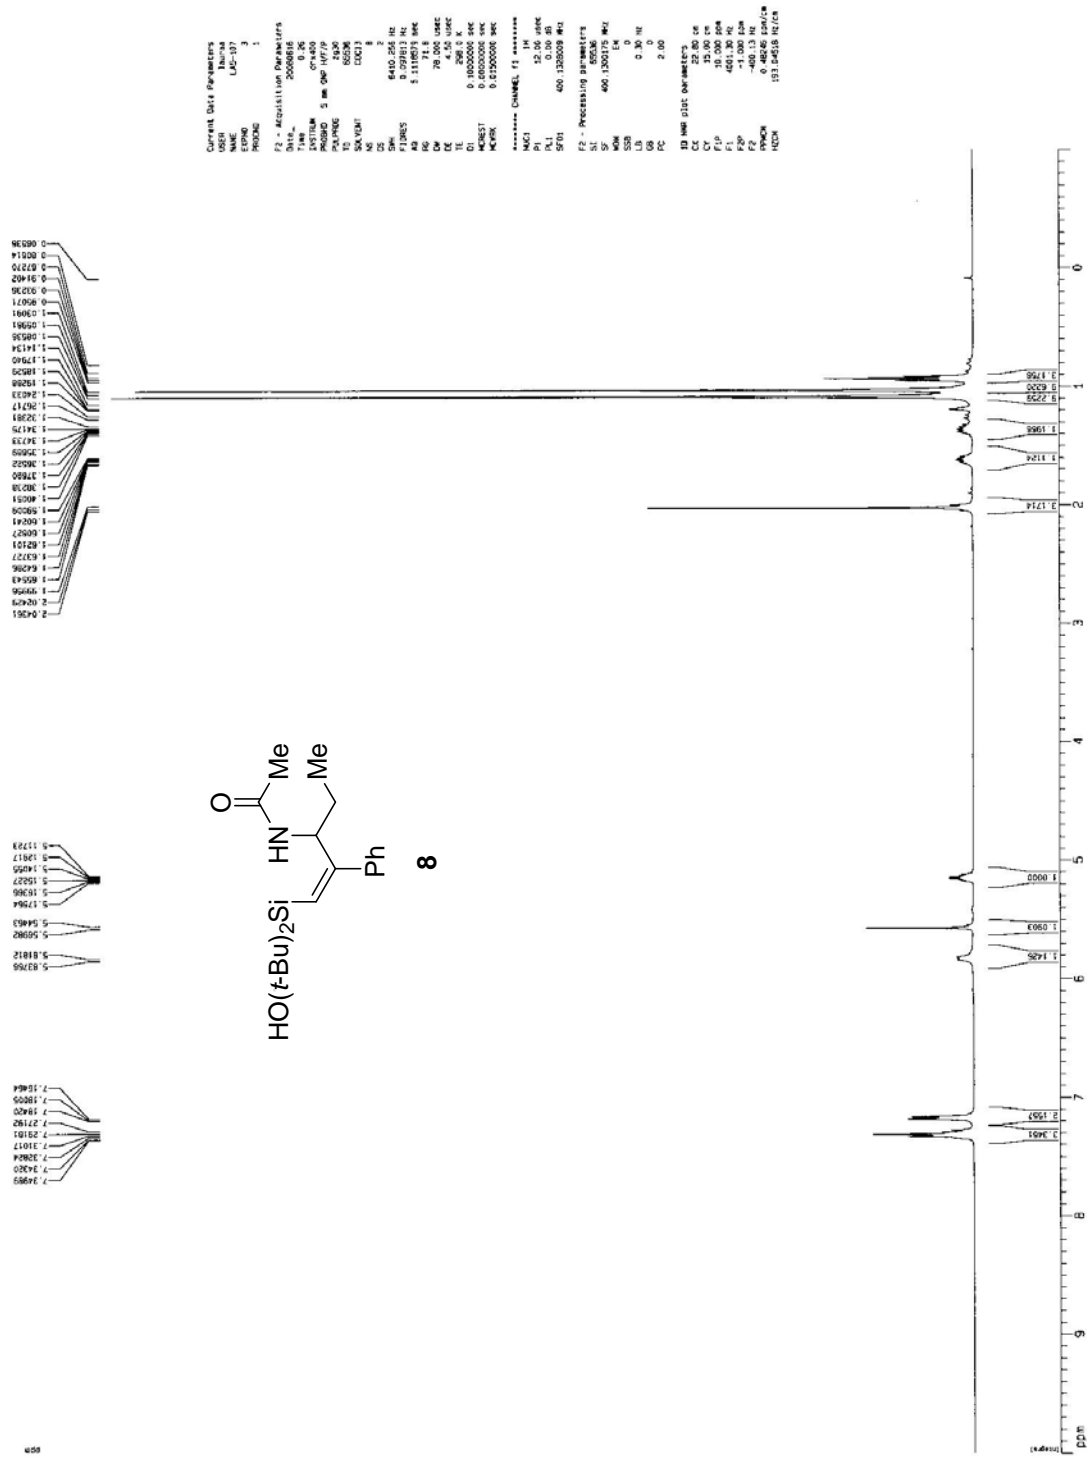

1H of LA5-74-4 4.23.06

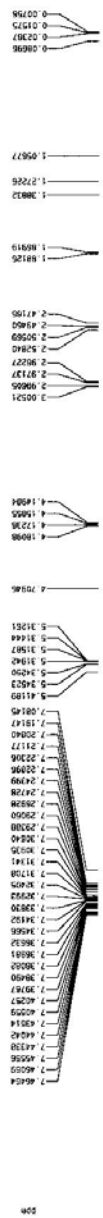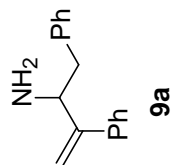

```

Current Data Parameters
=====
USER       Laura
NAME       LA5-74
PROCNO     1
PROBHD     5
=====
F2 - Acquisition Parameters
=====
Date_      20060423
Time       12.36
INSTRUM    spect
PULPROG    zgpg30
TD         65536
AQ         0.0330
RG         1024
SOLVENT    CDCl3
NS         4
DS         2
SWH         610.36 Hz
FIDRES     0.001376 Hz
AQRES      5.1118579 Hz
RGRES      24
SFO         400.1300000 MHz
NUC1        13C
NUC2        13C
NUC3
=====
F1 - Processing parameters
=====
SI         32768
SF         400.1300000 MHz
WDW        EM
SSB        0
LB         0.30 Hz
GB
PC         1.00
=====
F2 NMR list parameters
=====
SI         32768
SF         400.1300000 MHz
WDW        EM
SSB        0
LB         0.30 Hz
GB
PC         1.00
=====
F2 NMR list parameters
=====
SI         32768
SF         400.1300000 MHz
WDW        EM
SSB        0
LB         0.30 Hz
GB
PC         1.00
=====

```

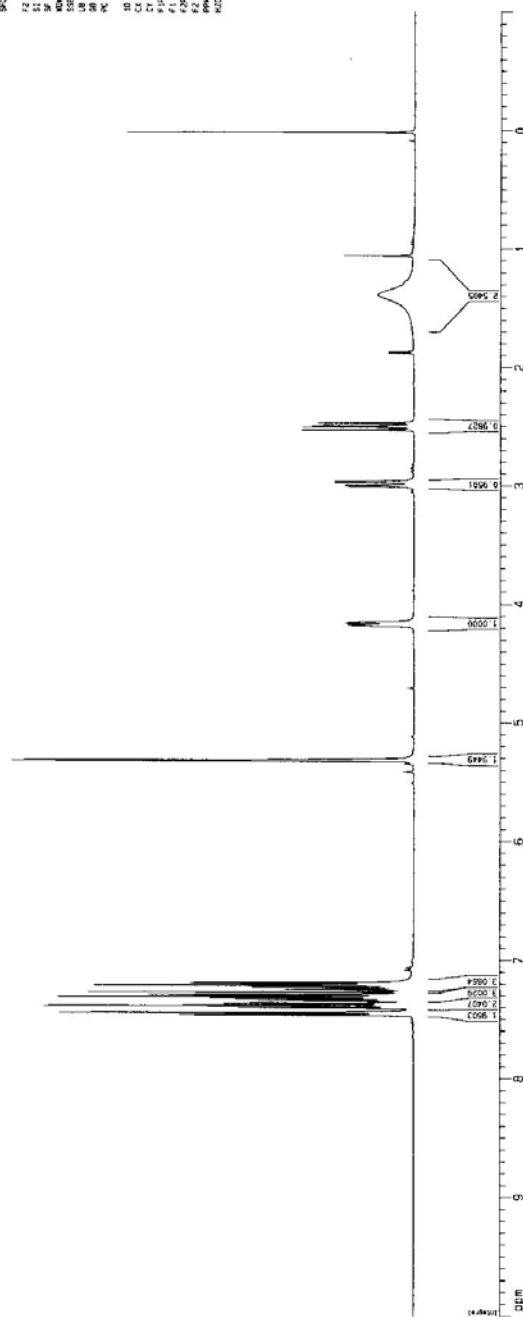

1H of LA4-64-2 7/17/07

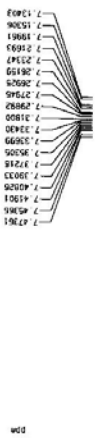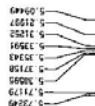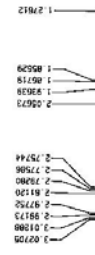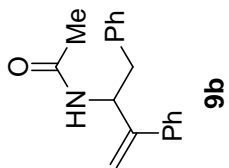

Current Data Parameters  
 Date\_ 20070717  
 NAME LA4-64 2  
 EXPNO 2  
 PROCNO 1  
 F2 - Acquisition Parameters  
 File\_ 20070717  
 F2NAME 20070717  
 INSTRUM spect  
 PROBRG zgpg30  
 TD 65536  
 SFO 400  
 SOLVENT CDCl3  
 DS 4  
 SWH 8145.296 Hz  
 FIDRES 0.009813 Hz  
 AQ 5.1110000 sec  
 RG 111  
 DW 79.006 usec  
 DE 19.75 usec  
 TE 300.2 K  
 SI 0.13000000 sec  
 SCANS 4  
 AVERST 0.00000000 sec  
 AVERIN 0.00000000 sec  
 AVERSC 0.00000000 sec  
 ===== CHANNEL f1 =====  
 NUC1 13C  
 P1 12.00 usec  
 PL1 0.00 dB  
 SFO1 400.1300000 MHz  
 F2 - Processing parameters  
 SI 65536  
 SF 400.1300000 MHz  
 DS 4  
 SWH 8145.296 Hz  
 FIDRES 0.009813 Hz  
 AQ 5.1110000 sec  
 RG 111  
 DW 79.006 usec  
 DE 19.75 usec  
 TE 300.2 K  
 SI 0.13000000 sec  
 SCANS 4  
 AVERST 0.00000000 sec  
 AVERIN 0.00000000 sec  
 AVERSC 0.00000000 sec  
 ===== CHANNEL f2 =====  
 NUC2 1H  
 P2 12.00 usec  
 PL2 0.00 dB  
 SFO2 400.1300000 MHz  
 F2 - Processing parameters  
 SI 65536  
 SF 400.1300000 MHz  
 DS 4  
 SWH 8145.296 Hz  
 FIDRES 0.009813 Hz  
 AQ 5.1110000 sec  
 RG 111  
 DW 79.006 usec  
 DE 19.75 usec  
 TE 300.2 K  
 SI 0.13000000 sec  
 SCANS 4  
 AVERST 0.00000000 sec  
 AVERIN 0.00000000 sec  
 AVERSC 0.00000000 sec

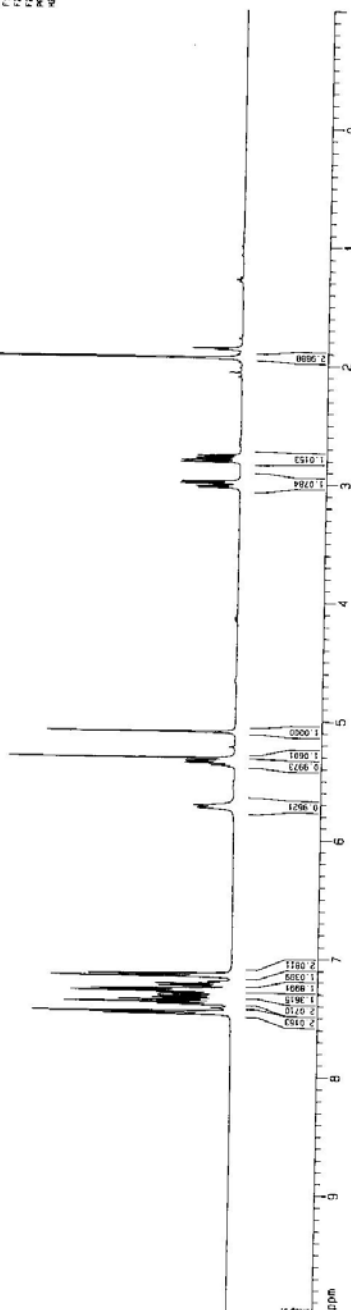







1H of LA5-1-12 3/21/08

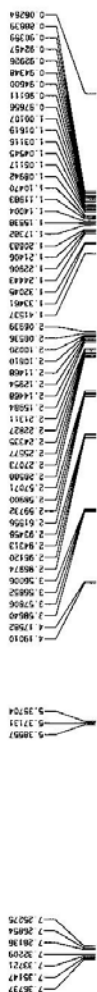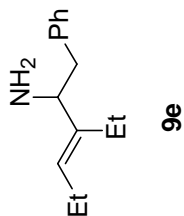

Current Data Parameters  
 LOG# 1  
 NAME LA5-1  
 EXPNO 12  
 PROCNO 1

F2 - Acquisition Parameters  
 Date\_ 20080321  
 Time 10.46  
 INSTRUM cryo500  
 PULPROG zgpg30  
 TO SOLVENT CDCl3  
 DS 2  
 SWH 912.800 Hz  
 FIDRES 0.000100 Hz  
 AQ 1.7  
 RG 3.200074 Hz  
 AC 1.7  
 DN 60.000 sec  
 DE 1.000000 sec  
 TE 298.2 K  
 D1 0.1000000 sec  
 d11 0.1000000 sec  
 WALTZ16 0.1500000 sec

----- CHANNEL f1 -----  
 NUC1 1H  
 P1 7.20 uSec  
 PL1 0.00 dB  
 SFO1 500.265315 MHz

F2 - Processing parameters  
 SI 500.265315 MHz  
 SF 500.265315 MHz  
 WDW EM  
 GB 0.35 Hz  
 LB 0.0 Hz  
 GB 0.0 Hz  
 PC 1.00

10 NMR 3101 PARAMETERS  
 CX 32.85 cm  
 CY 32.85 cm  
 CZ 32.85 cm  
 F1P 10.000 GHz  
 F1 500.265 MHz  
 F2 1.000 GHz  
 F3 1.000 GHz  
 P1 0.000000 sec  
 P2 0.000000 sec  
 P3 0.000000 sec  
 P4 0.000000 sec  
 P5 0.000000 sec  
 P6 0.000000 sec  
 P7 0.000000 sec  
 P8 0.000000 sec  
 P9 0.000000 sec  
 P10 0.000000 sec  
 P11 0.000000 sec  
 P12 0.000000 sec  
 P13 0.000000 sec  
 P14 0.000000 sec  
 P15 0.000000 sec  
 P16 0.000000 sec  
 P17 0.000000 sec  
 P18 0.000000 sec  
 P19 0.000000 sec  
 P20 0.000000 sec  
 P21 0.000000 sec  
 P22 0.000000 sec  
 P23 0.000000 sec  
 P24 0.000000 sec  
 P25 0.000000 sec  
 P26 0.000000 sec  
 P27 0.000000 sec  
 P28 0.000000 sec  
 P29 0.000000 sec  
 P30 0.000000 sec  
 P31 0.000000 sec  
 P32 0.000000 sec  
 P33 0.000000 sec  
 P34 0.000000 sec  
 P35 0.000000 sec  
 P36 0.000000 sec  
 P37 0.000000 sec  
 P38 0.000000 sec  
 P39 0.000000 sec  
 P40 0.000000 sec  
 P41 0.000000 sec  
 P42 0.000000 sec  
 P43 0.000000 sec  
 P44 0.000000 sec  
 P45 0.000000 sec  
 P46 0.000000 sec  
 P47 0.000000 sec  
 P48 0.000000 sec  
 P49 0.000000 sec  
 P50 0.000000 sec  
 P51 0.000000 sec  
 P52 0.000000 sec  
 P53 0.000000 sec  
 P54 0.000000 sec  
 P55 0.000000 sec  
 P56 0.000000 sec  
 P57 0.000000 sec  
 P58 0.000000 sec  
 P59 0.000000 sec  
 P60 0.000000 sec  
 P61 0.000000 sec  
 P62 0.000000 sec  
 P63 0.000000 sec  
 P64 0.000000 sec  
 P65 0.000000 sec  
 P66 0.000000 sec  
 P67 0.000000 sec  
 P68 0.000000 sec  
 P69 0.000000 sec  
 P70 0.000000 sec  
 P71 0.000000 sec  
 P72 0.000000 sec  
 P73 0.000000 sec  
 P74 0.000000 sec  
 P75 0.000000 sec  
 P76 0.000000 sec  
 P77 0.000000 sec  
 P78 0.000000 sec  
 P79 0.000000 sec  
 P80 0.000000 sec  
 P81 0.000000 sec  
 P82 0.000000 sec  
 P83 0.000000 sec  
 P84 0.000000 sec  
 P85 0.000000 sec  
 P86 0.000000 sec  
 P87 0.000000 sec  
 P88 0.000000 sec  
 P89 0.000000 sec  
 P90 0.000000 sec  
 P91 0.000000 sec  
 P92 0.000000 sec  
 P93 0.000000 sec  
 P94 0.000000 sec  
 P95 0.000000 sec  
 P96 0.000000 sec  
 P97 0.000000 sec  
 P98 0.000000 sec  
 P99 0.000000 sec  
 P100 0.000000 sec

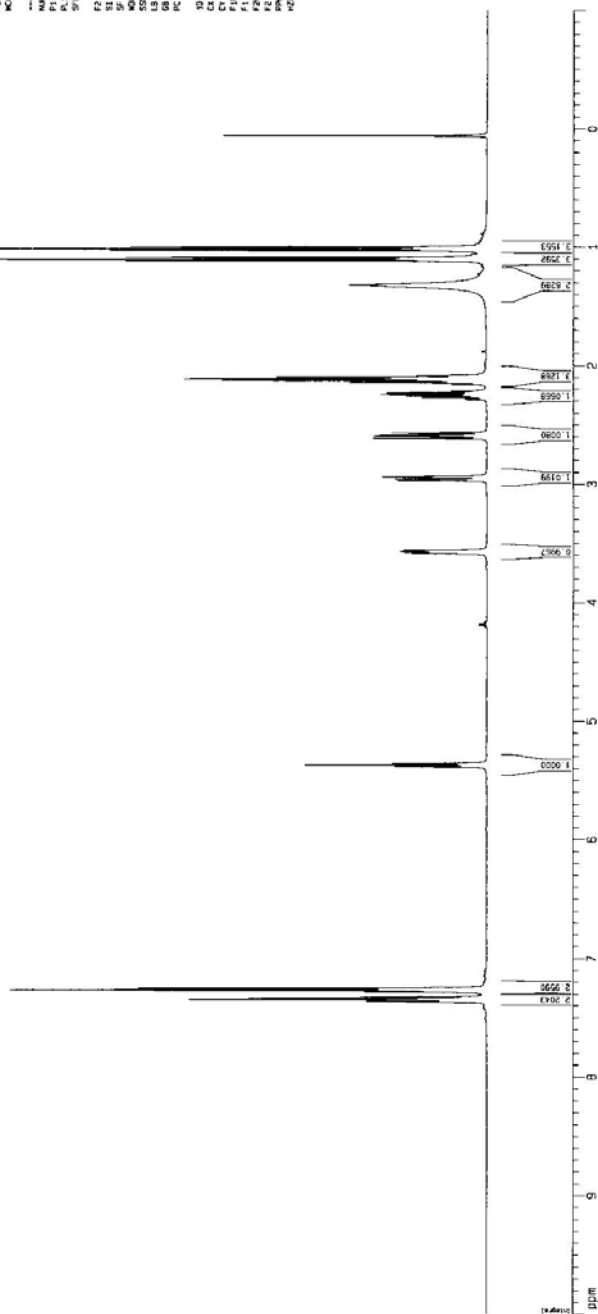





1H of LA5-121-1 after workup 6/9/08

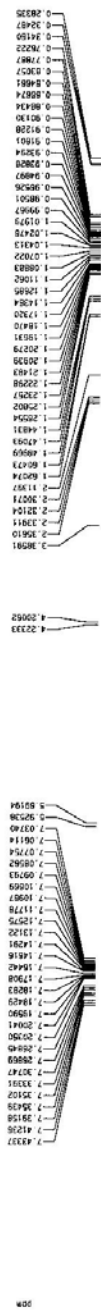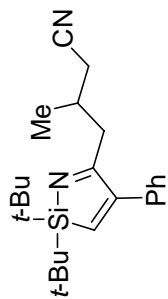

12

Current Data Parameters  
 USER: J.A.W.  
 NAME: LA5-121  
 PROCNO: 1  
 F2 - Acquisition Parameters  
 Date\_Time: 06/09/08 11:15  
 INSTRUM: spect  
 PULPROG: zgpg30  
 F4: 300.136  
 F2: 400.150  
 F1: 100.626  
 AQ: 5.118675 sec  
 AD: 64  
 DE: 79.440000 sec  
 TE: 298.2 K  
 DI: 0.1000000 sec  
 SFO1: 400.1500000 MHz  
 NUC1: 13C  
 NUC2: 1H  
 P1: 12.00 sec  
 PL1: 0.00 dB  
 PL2: 0.00 dB  
 PL3: 0.00 dB  
 PL4: 0.00 dB  
 PL5: 0.00 dB  
 PL6: 0.00 dB  
 PL7: 0.00 dB  
 PL8: 0.00 dB  
 PL9: 0.00 dB  
 PL10: 0.00 dB  
 F2 - Processing parameters  
 SI: 32768  
 SF: 400.1500411 MHz  
 DS: 4  
 LB: 0.30 Hz  
 GB: 0  
 PC: 2.00  
 10 MHz data parameters  
 SI: 32768  
 SF: 100.6261515 MHz  
 DS: 4  
 LB: 0.30 Hz  
 GB: 0  
 PC: 2.00  
 F2 - Acquisition Parameters  
 Date\_Time: 06/09/08 11:15  
 INSTRUM: spect  
 PULPROG: zgpg30  
 F4: 300.136  
 F2: 400.150  
 F1: 100.626  
 AQ: 5.118675 sec  
 AD: 64  
 DE: 79.440000 sec  
 TE: 298.2 K  
 DI: 0.1000000 sec  
 SFO1: 400.1500000 MHz  
 NUC1: 13C  
 NUC2: 1H  
 P1: 12.00 sec  
 PL1: 0.00 dB  
 PL2: 0.00 dB  
 PL3: 0.00 dB  
 PL4: 0.00 dB  
 PL5: 0.00 dB  
 PL6: 0.00 dB  
 PL7: 0.00 dB  
 PL8: 0.00 dB  
 PL9: 0.00 dB  
 PL10: 0.00 dB  
 F2 - Processing parameters  
 SI: 32768  
 SF: 400.1500411 MHz  
 DS: 4  
 LB: 0.30 Hz  
 GB: 0  
 PC: 2.00  
 10 MHz data parameters  
 SI: 32768  
 SF: 100.6261515 MHz  
 DS: 4  
 LB: 0.30 Hz  
 GB: 0  
 PC: 2.00

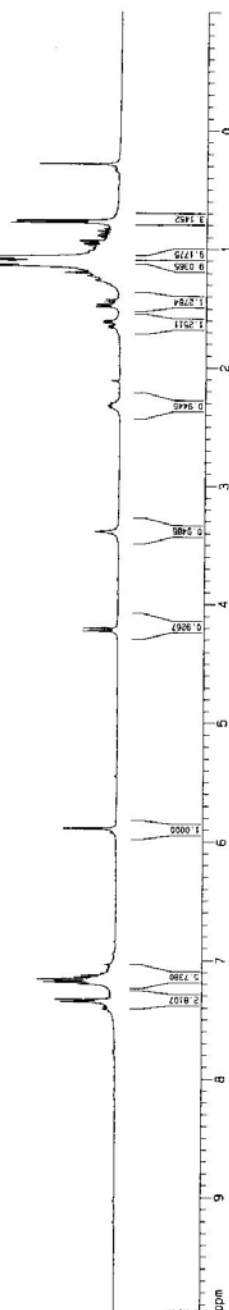







<sup>13</sup>C spectrum with <sup>1</sup>H decoupling

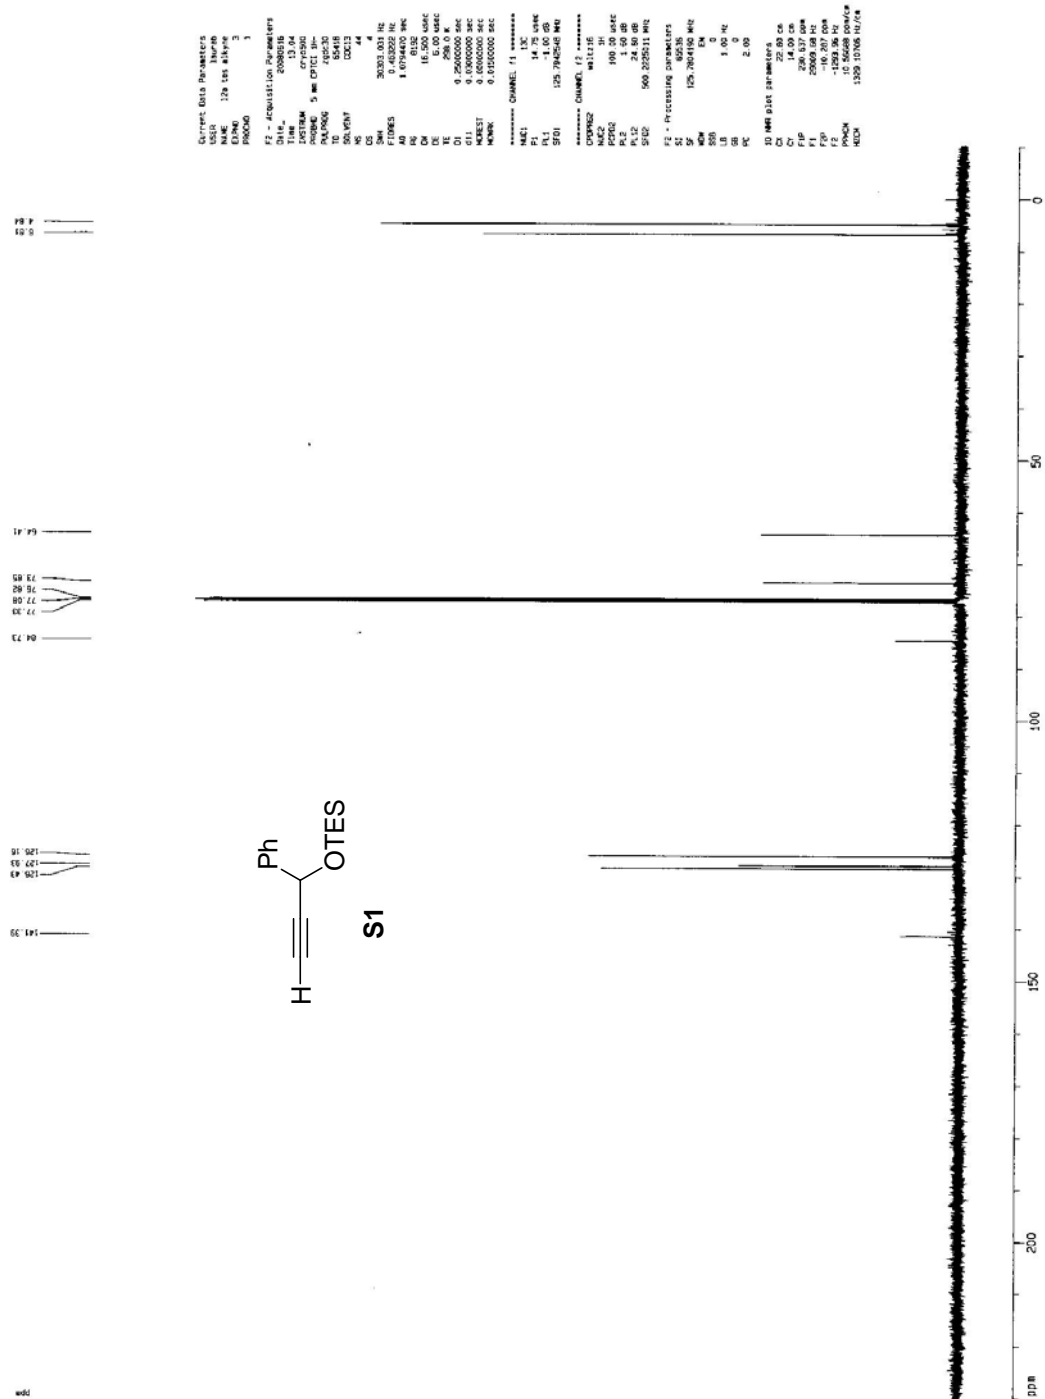

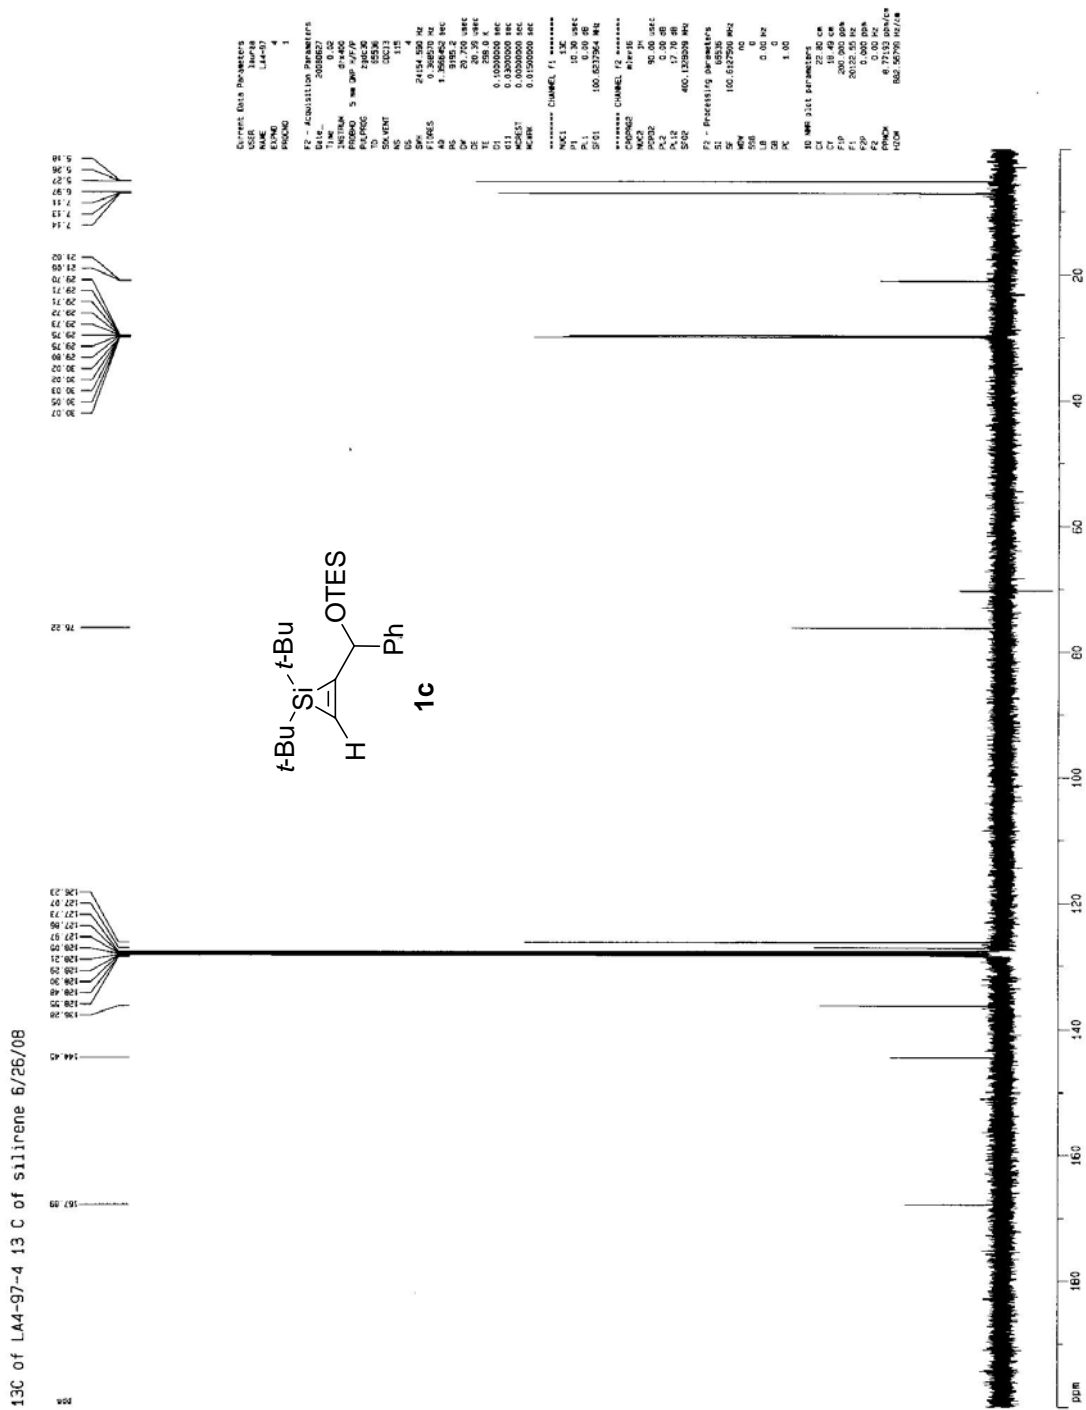



13C of LA4-80-2 8/4/07

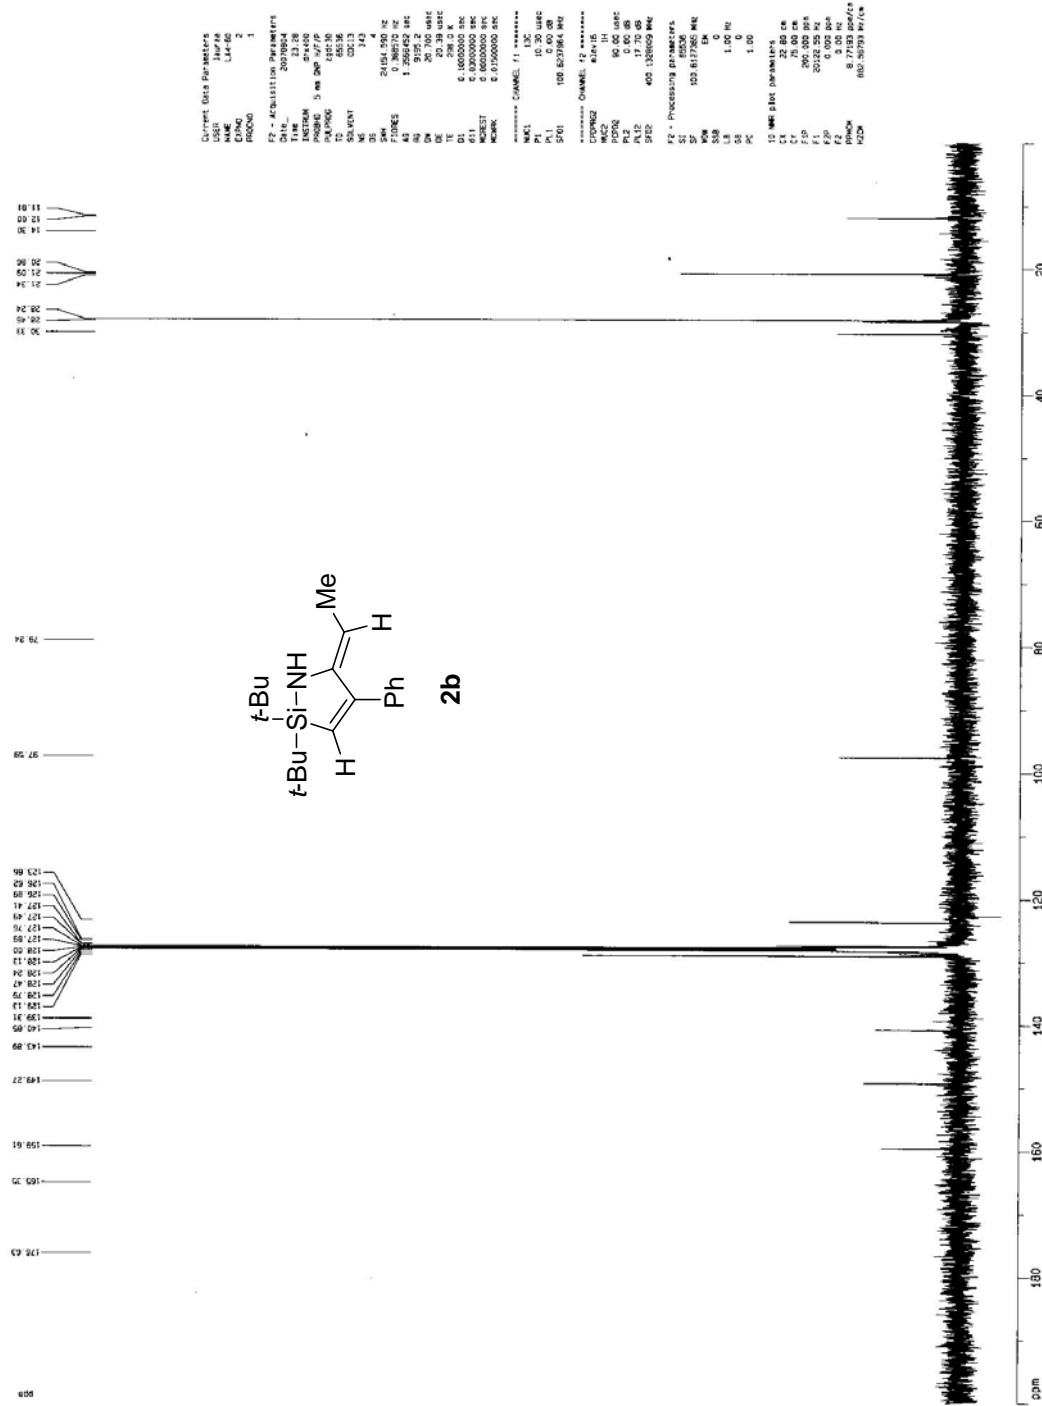

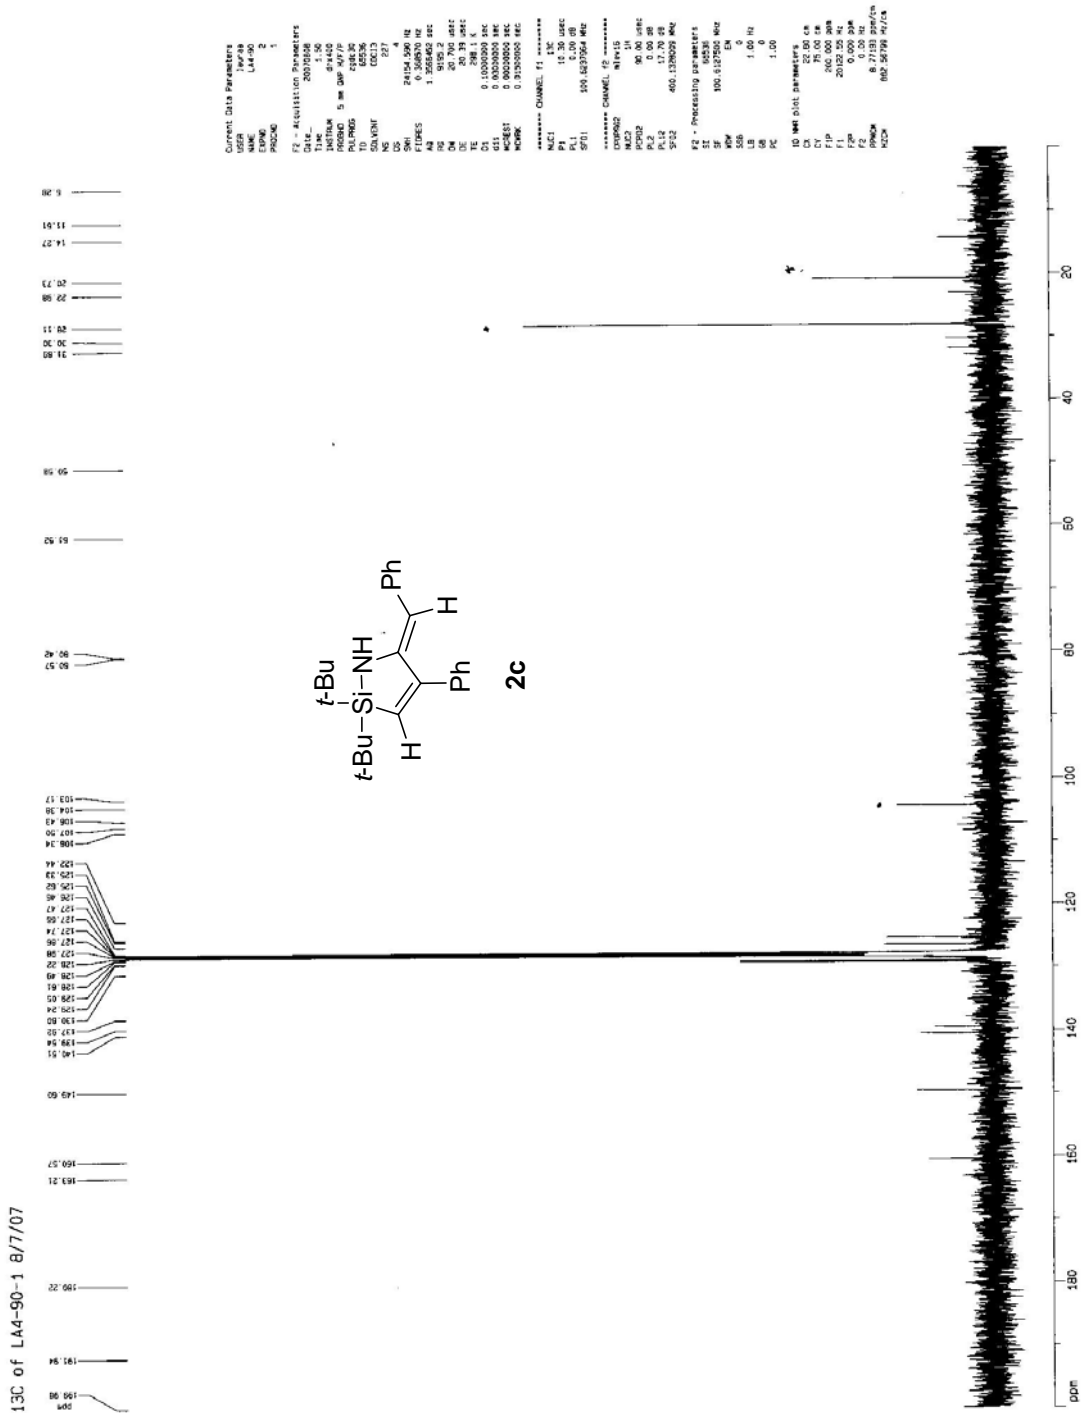

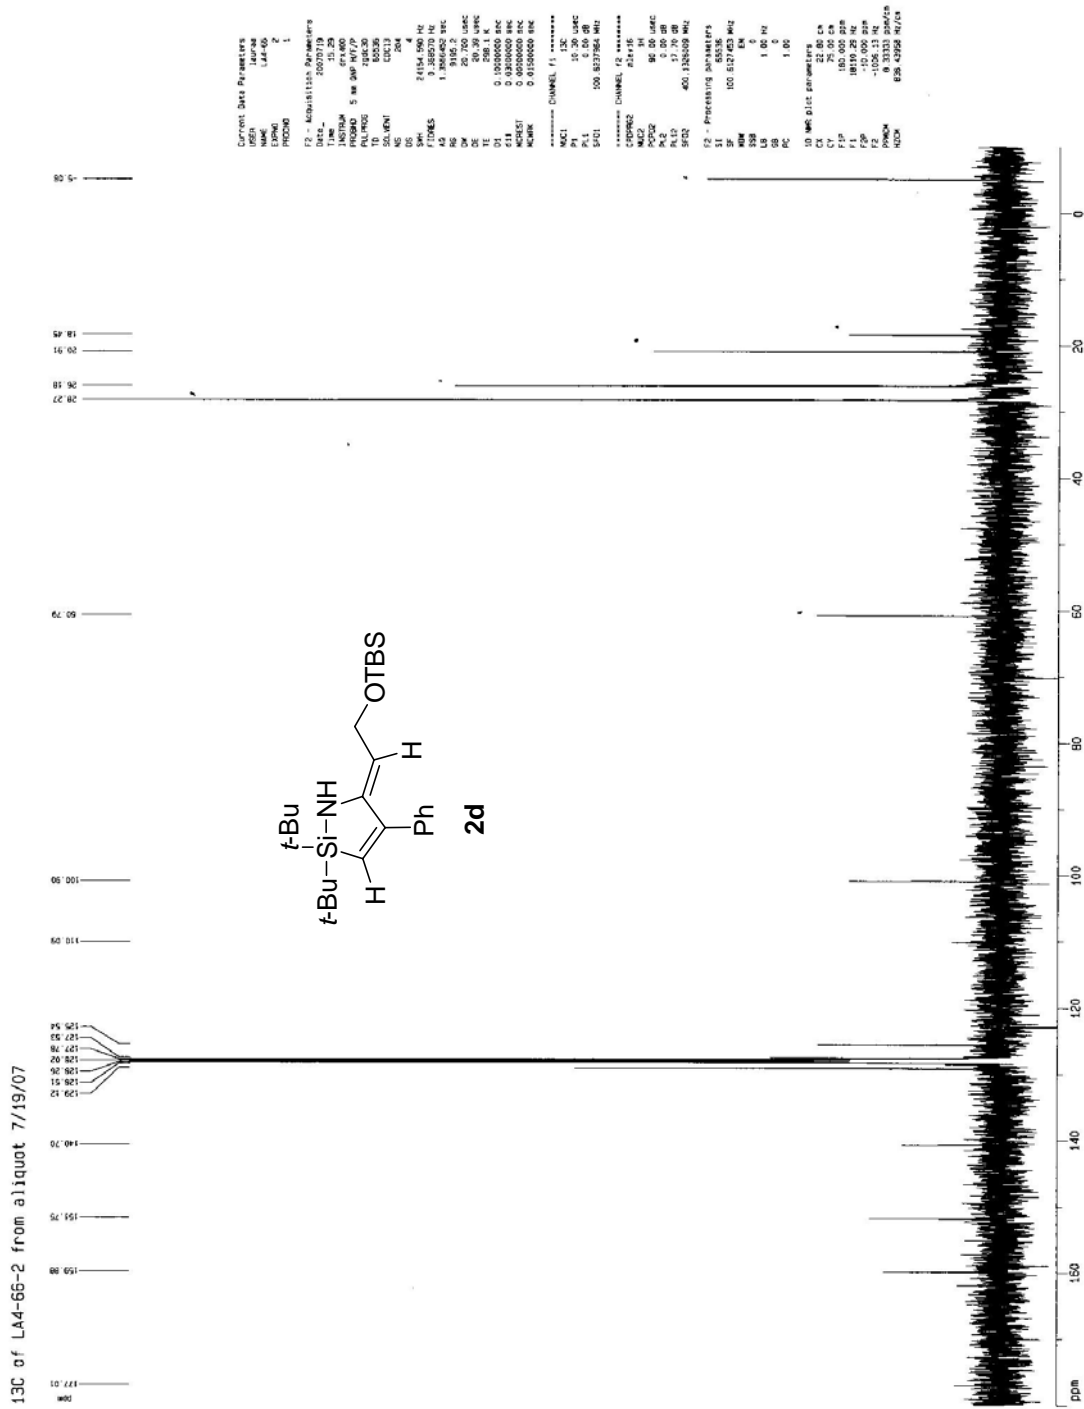

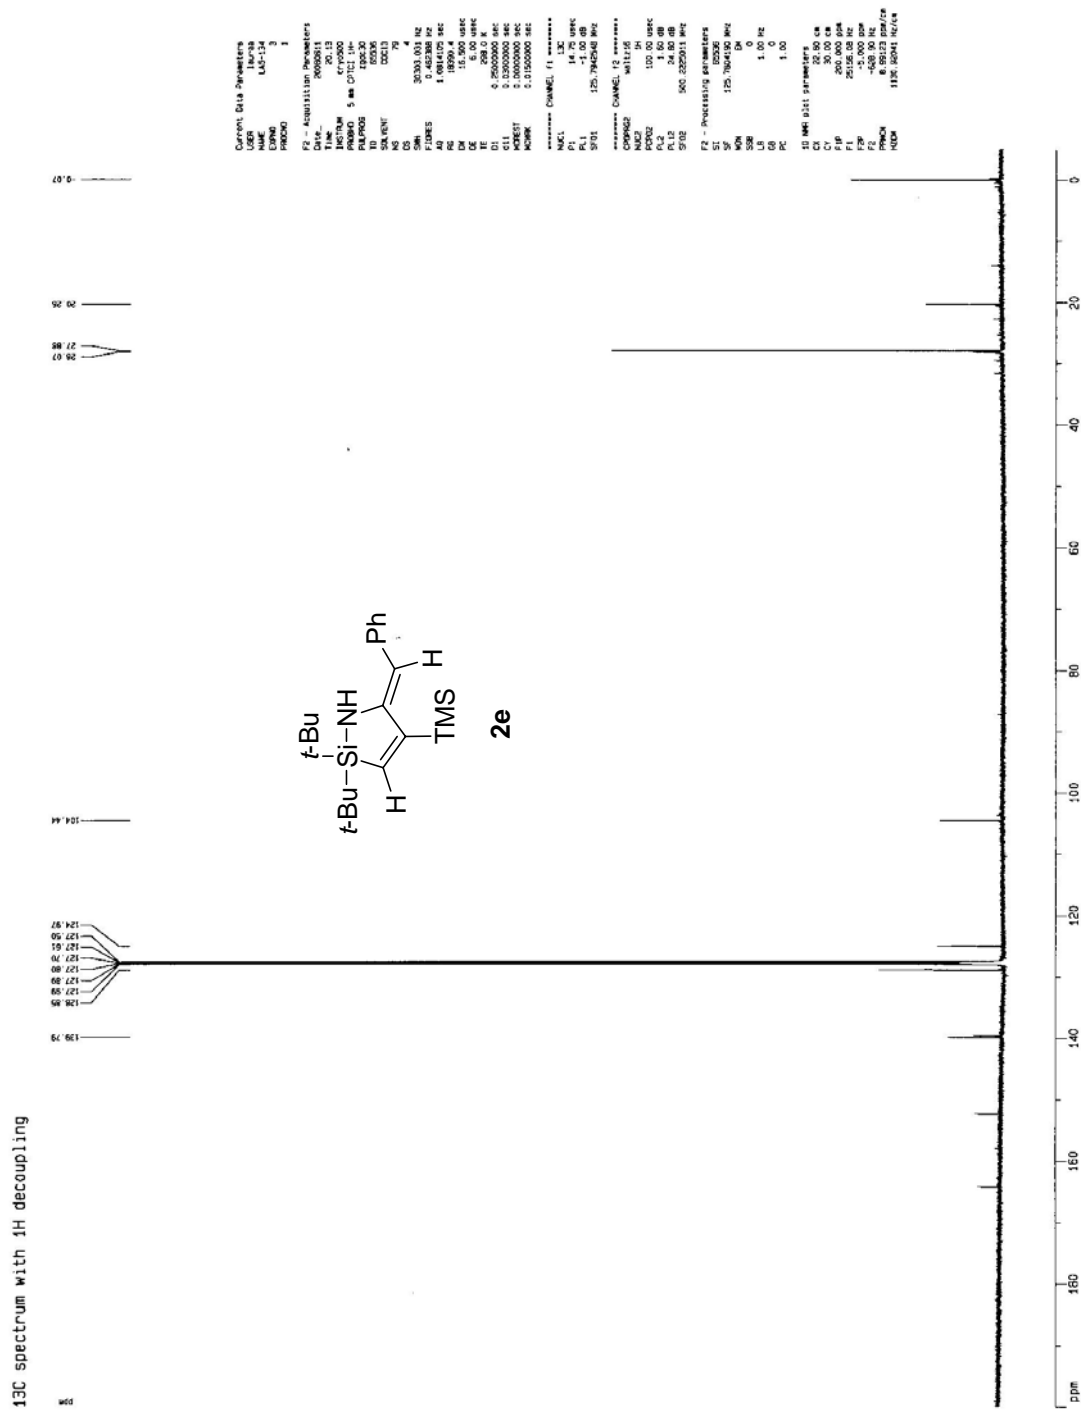

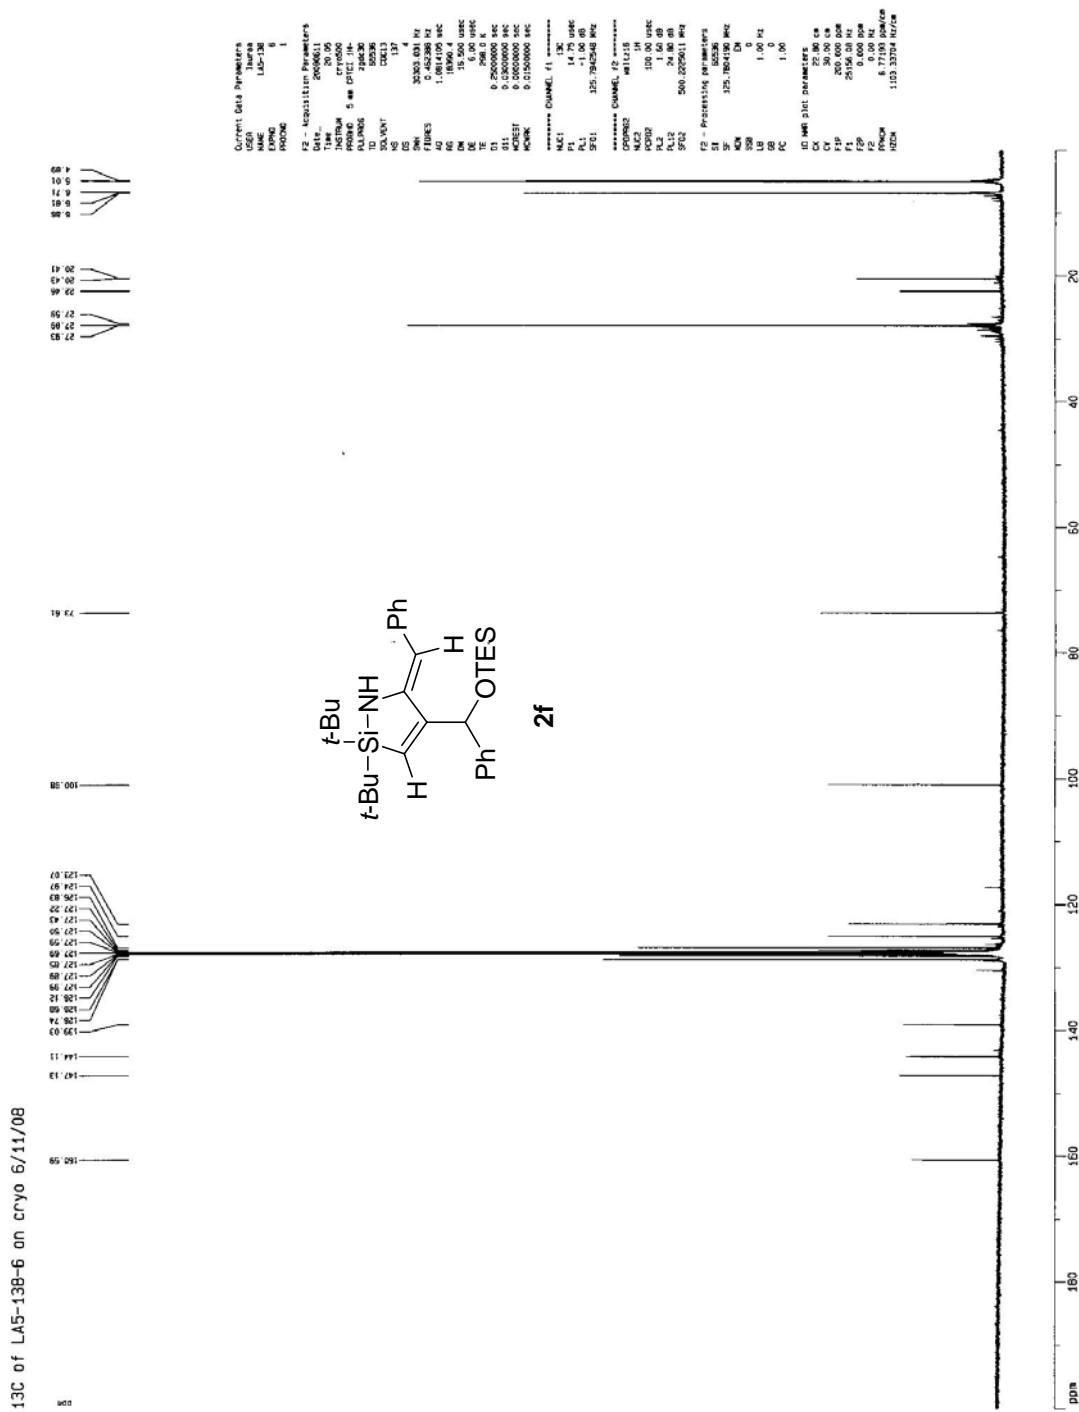



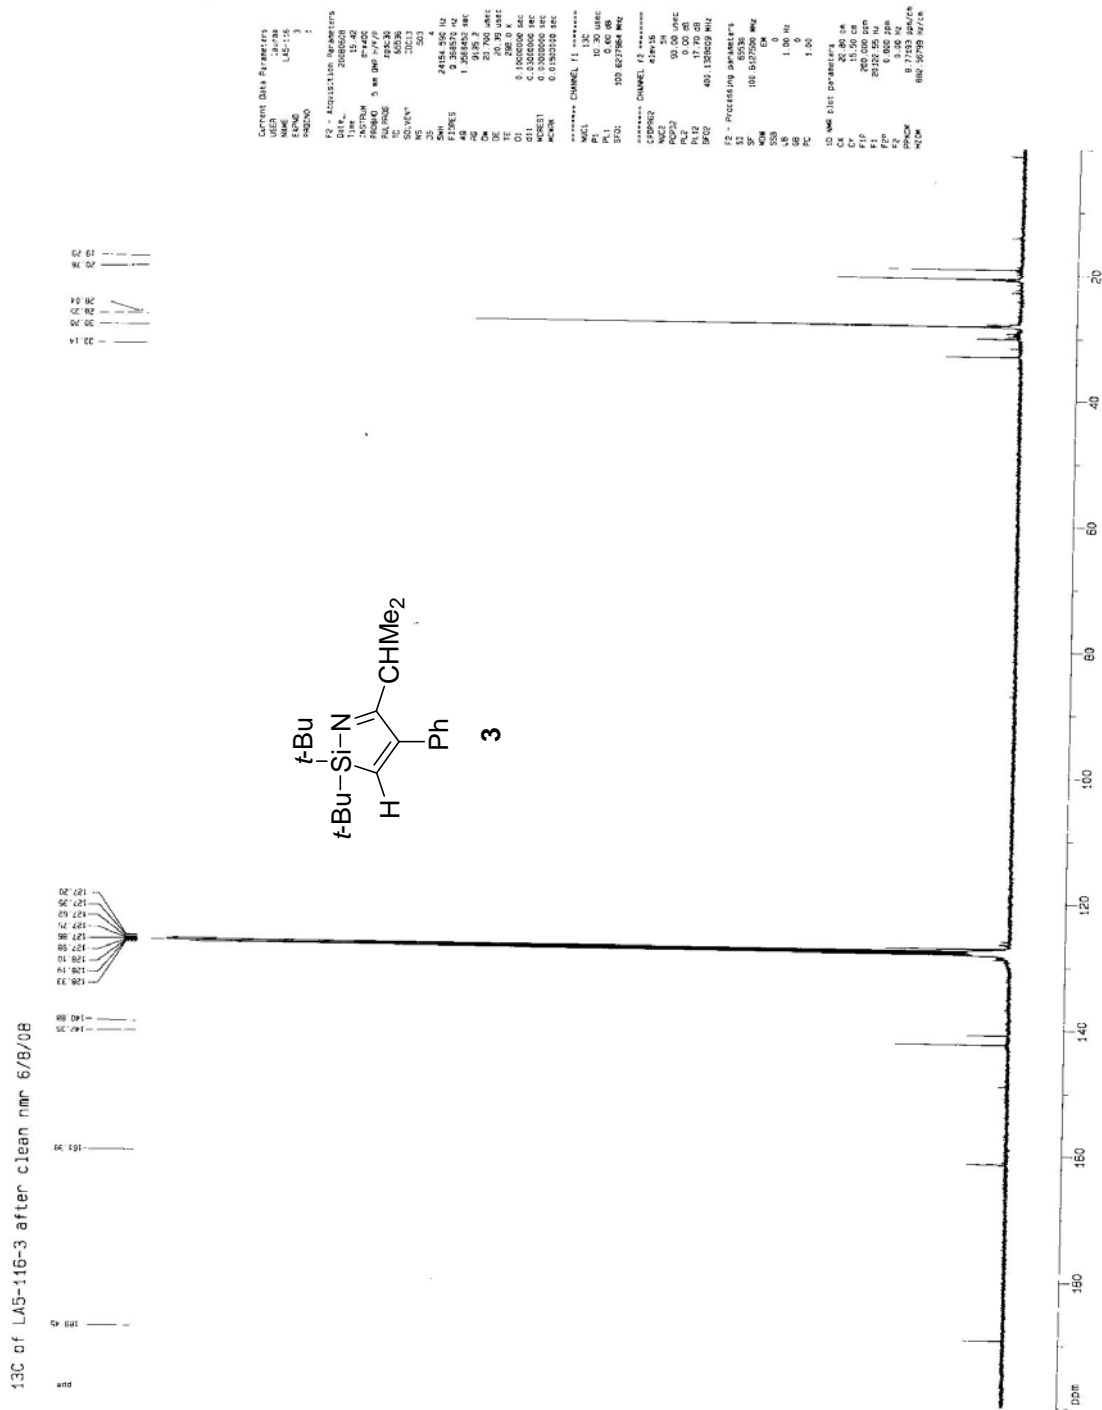

13C of LA5-4b-11 you can see both regioisomers in here 4/11/08

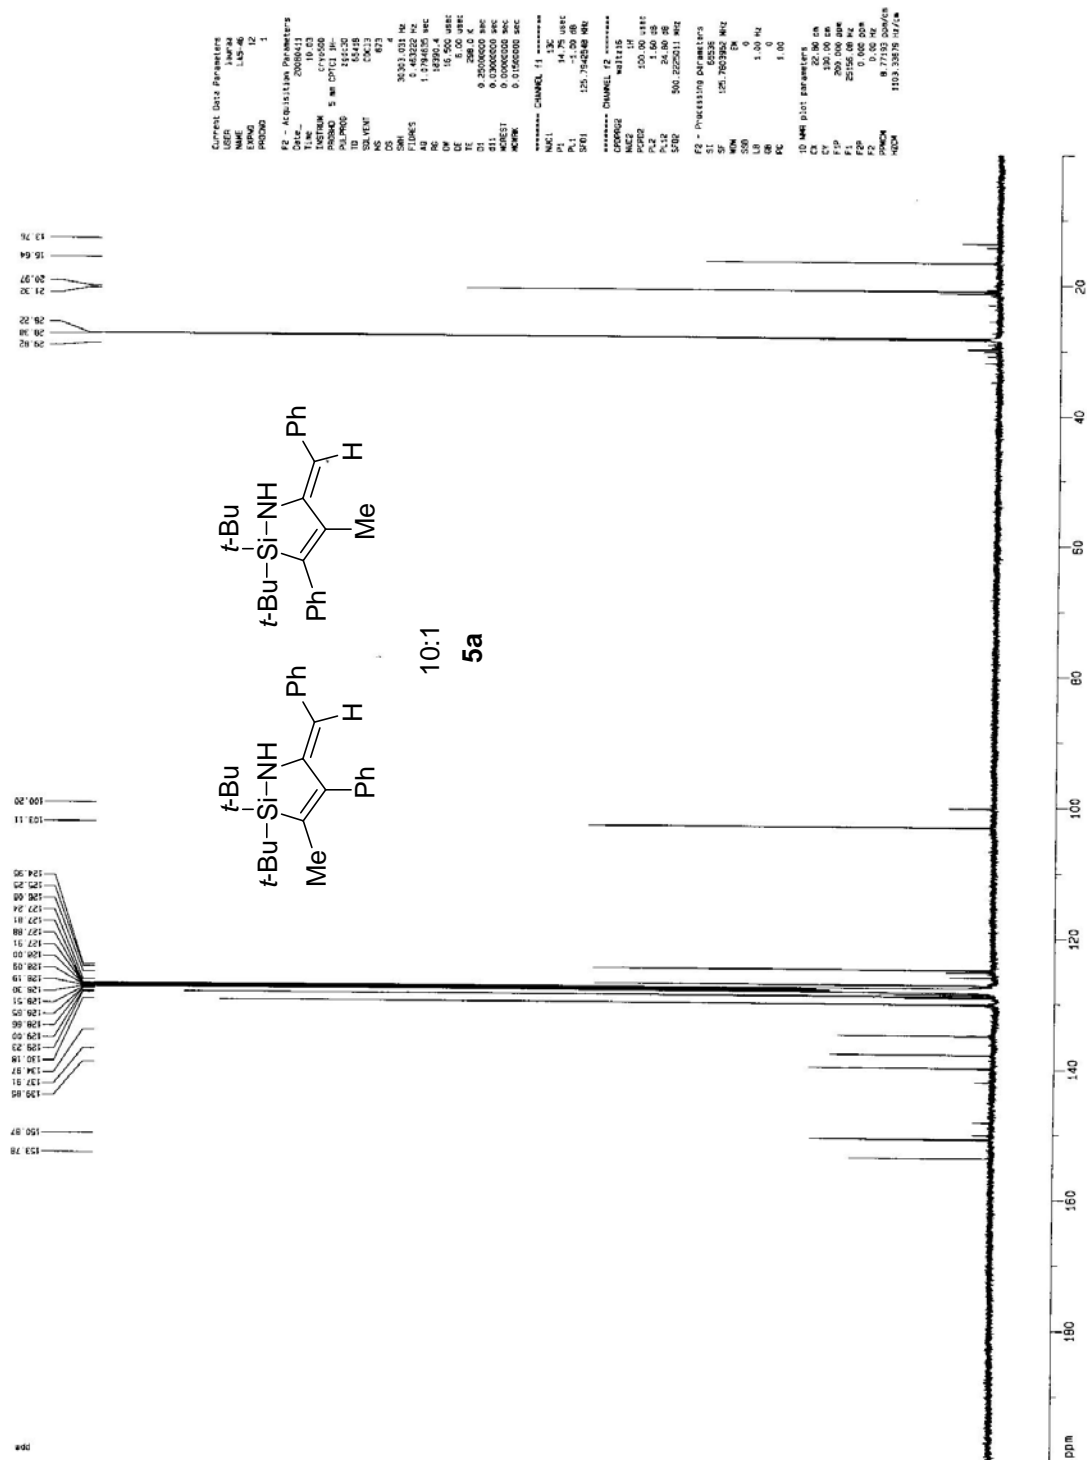





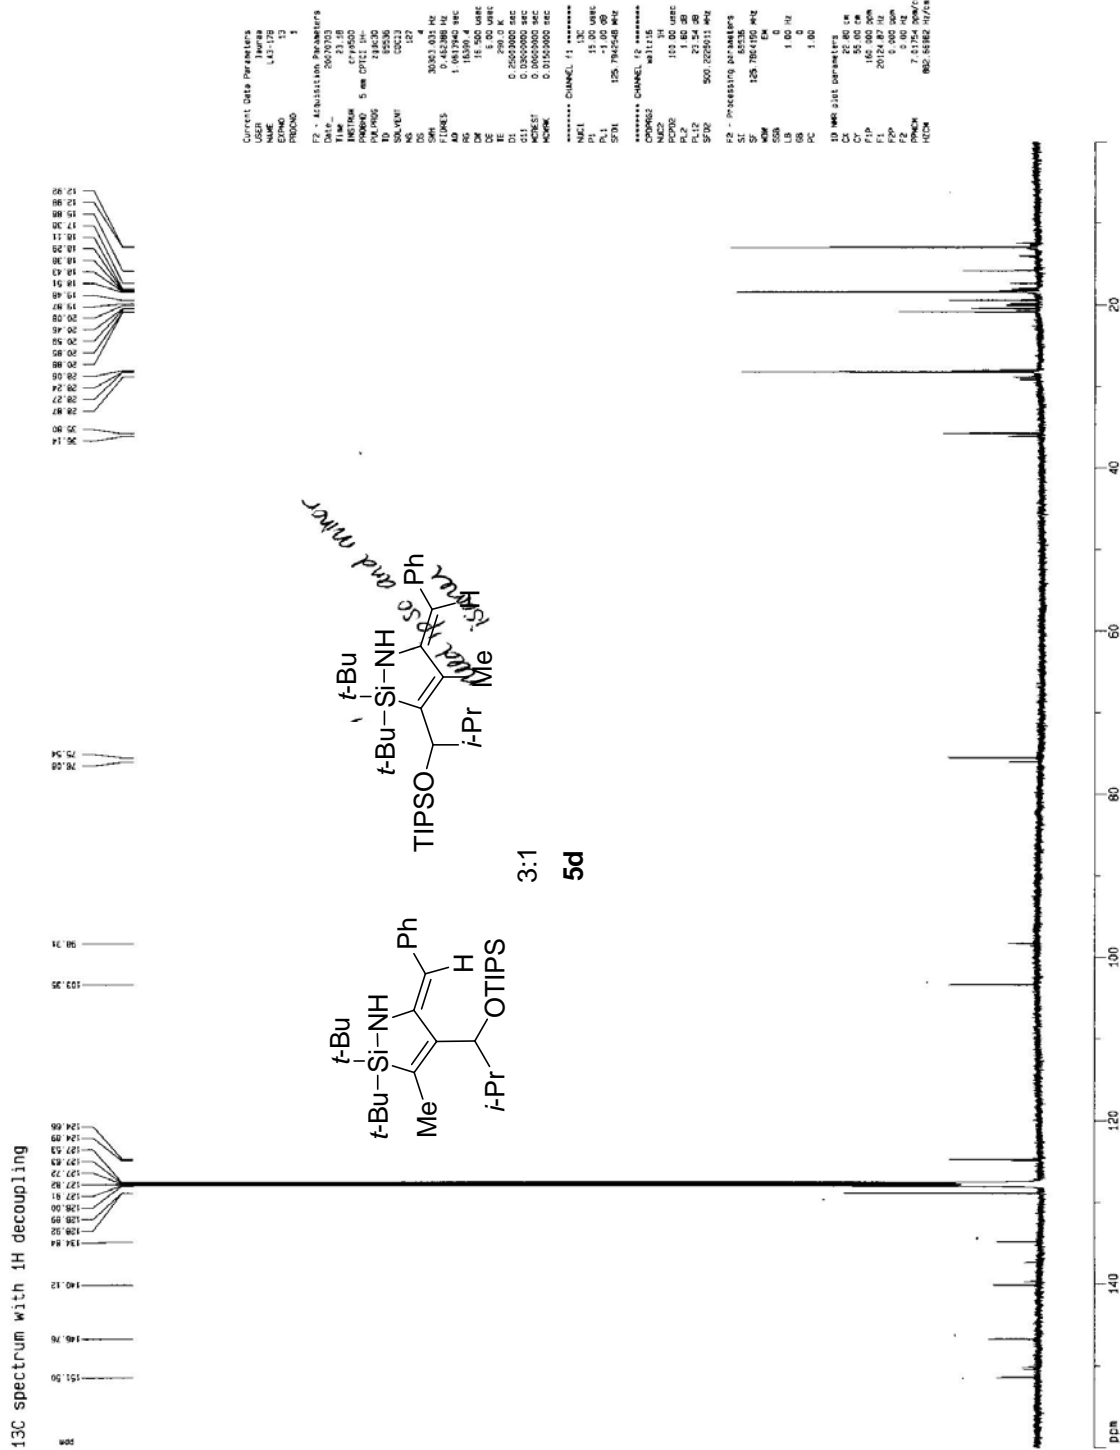

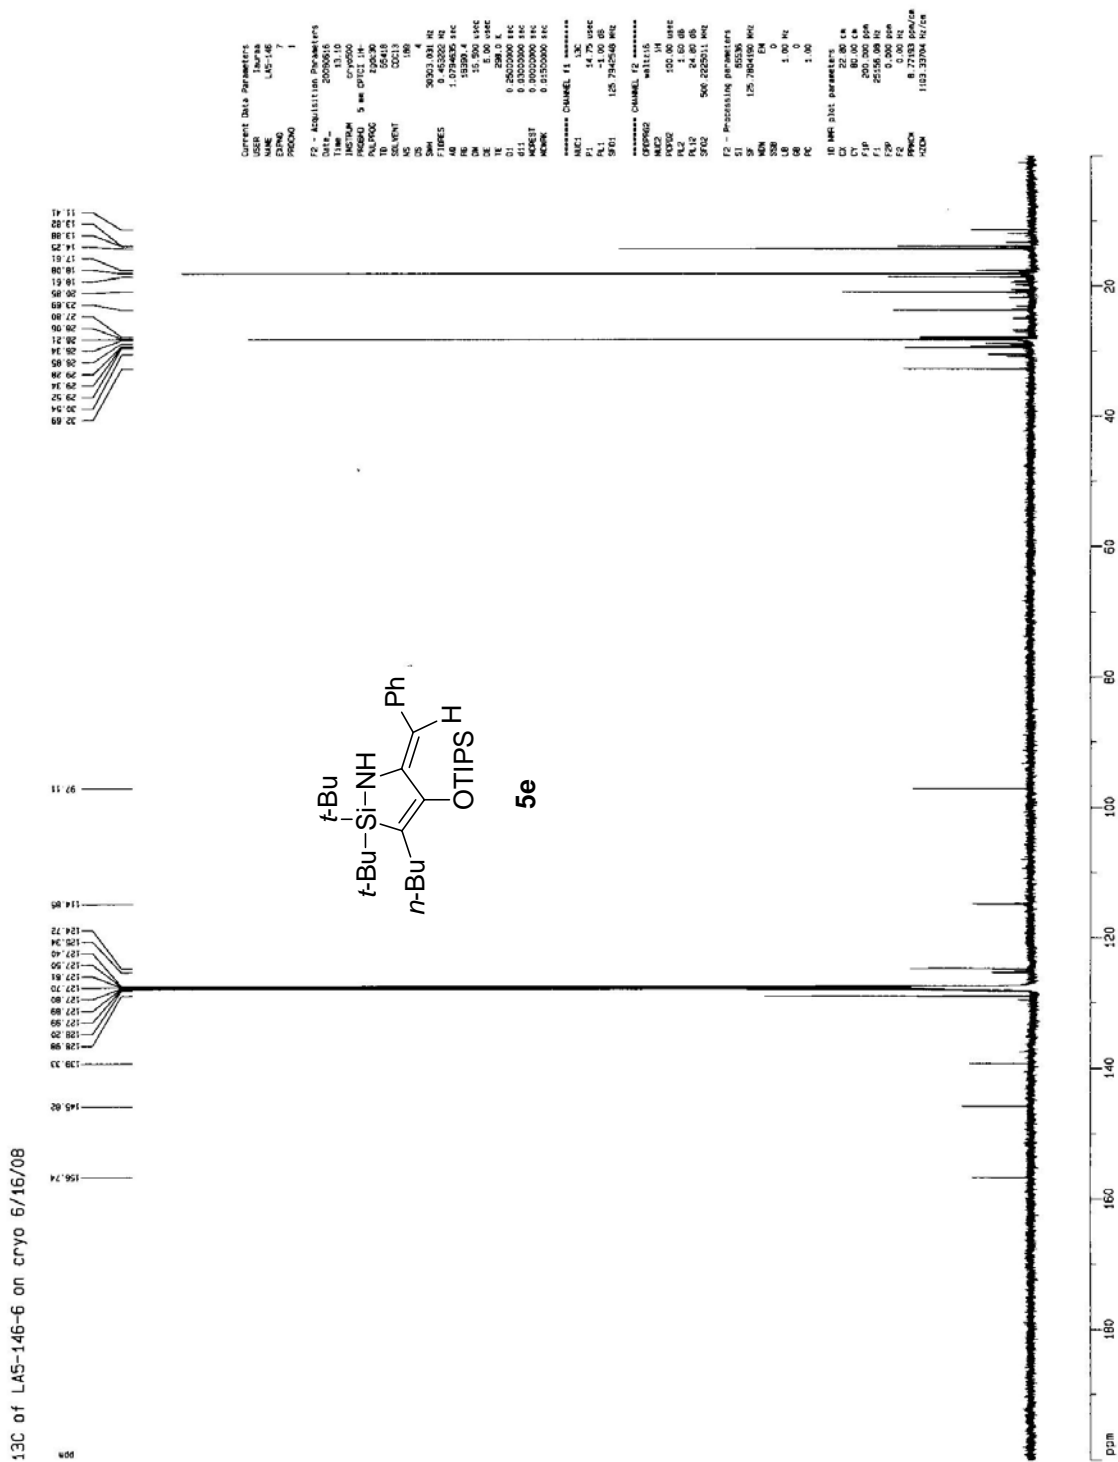

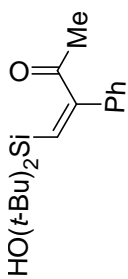

S-3

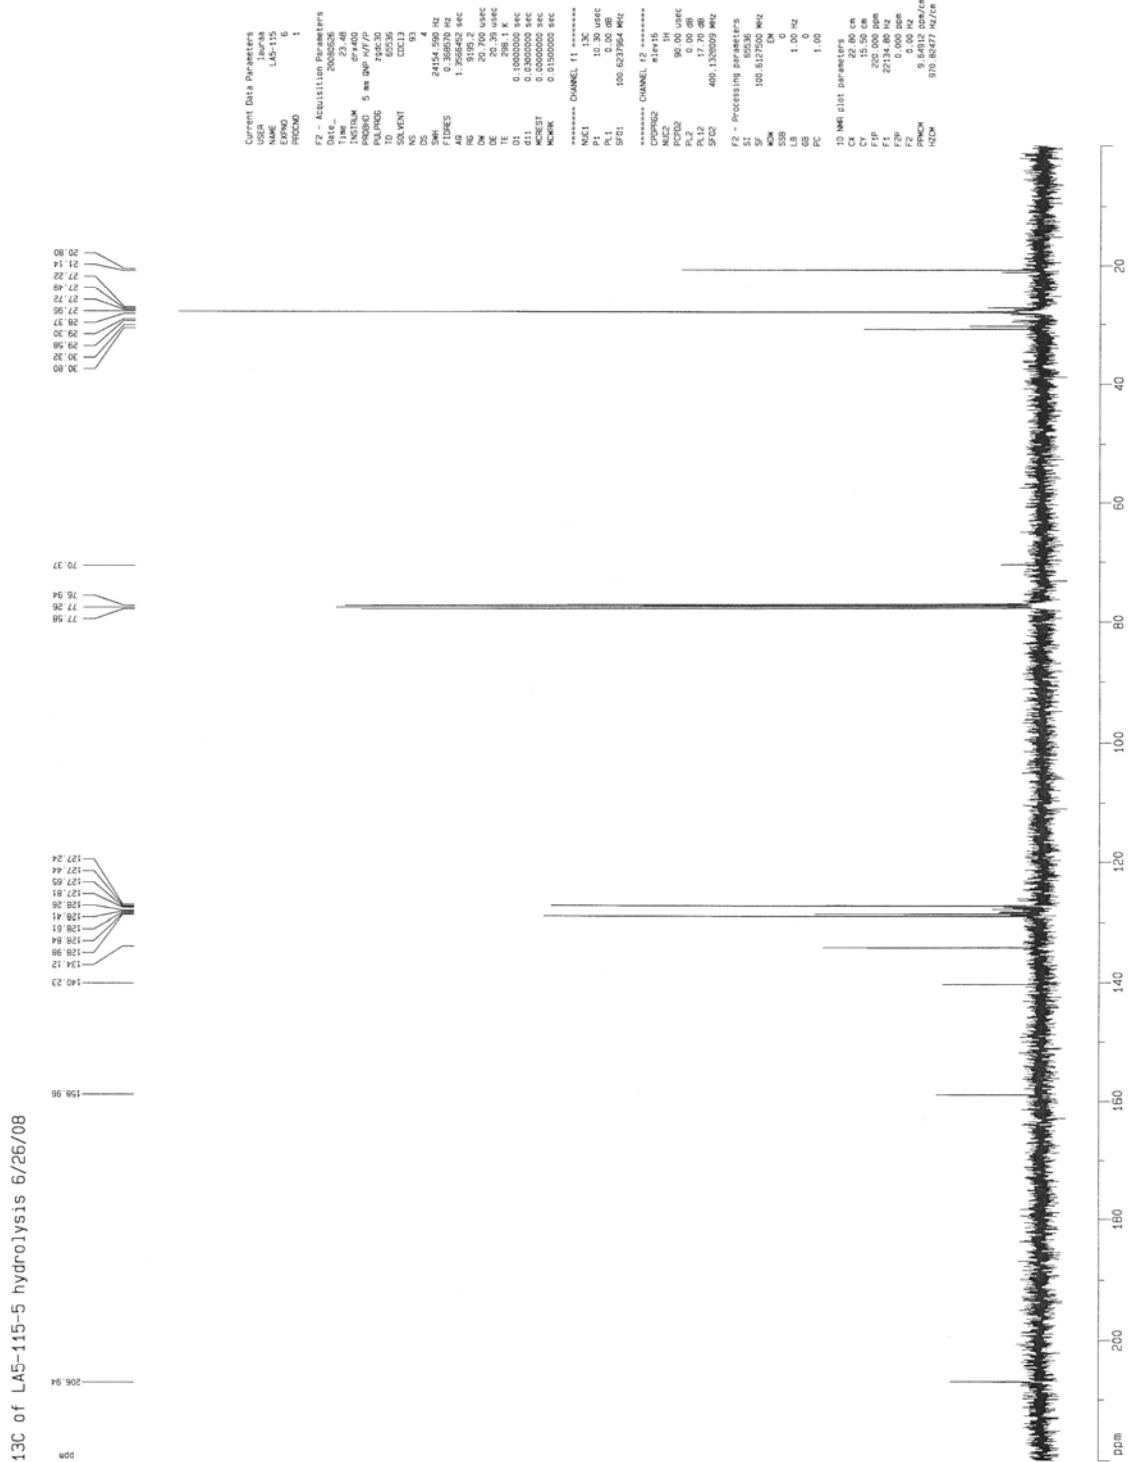

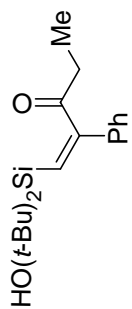**S-4**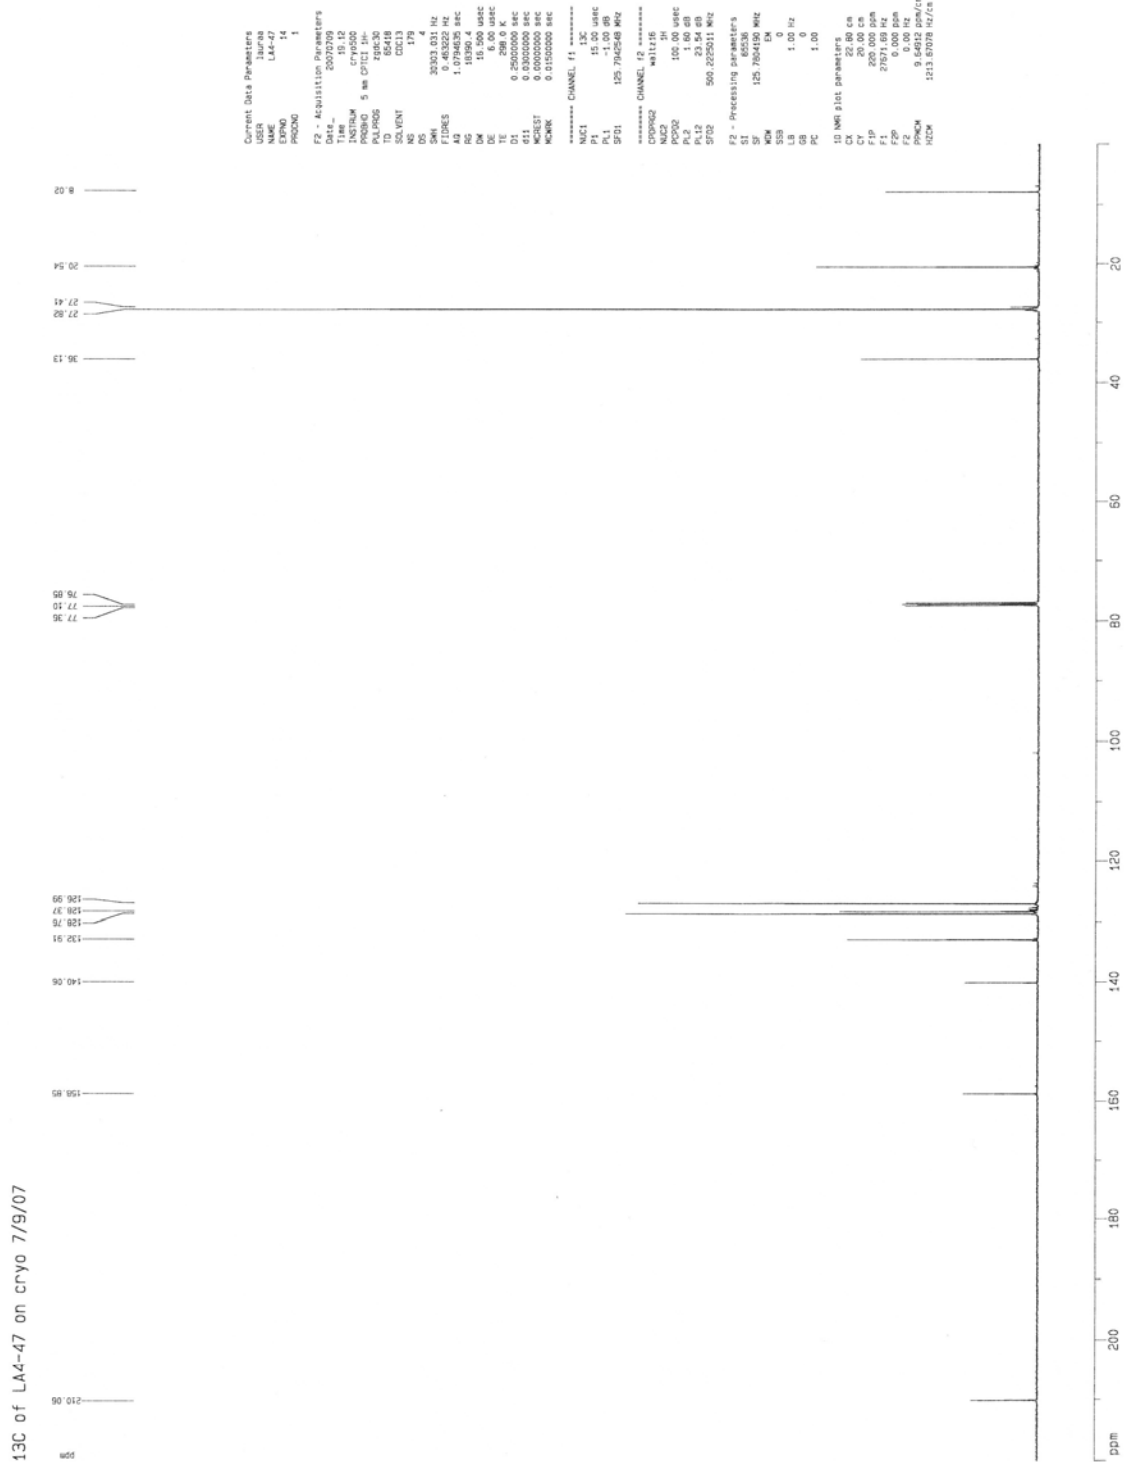



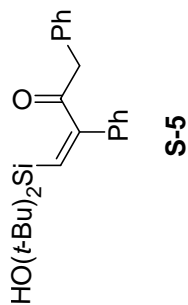

<sup>13</sup>C of LA4-4B-2 after two columns on cryo 7/9/07

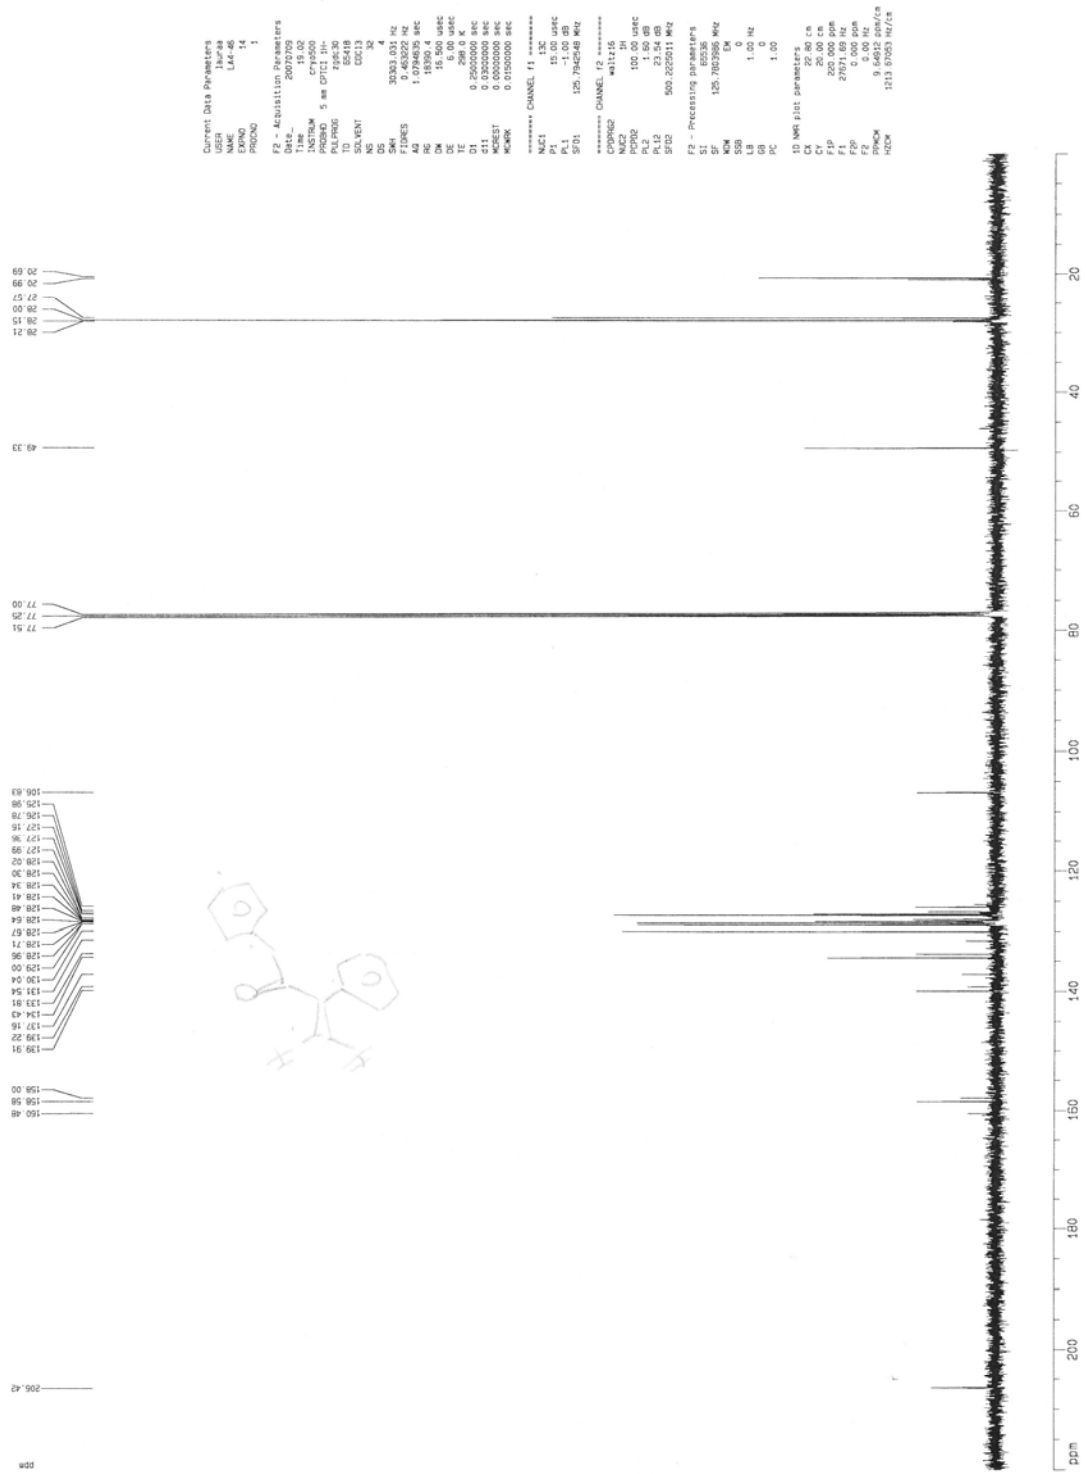





<sup>13</sup>C of LA4-75-2 after chromatography sample for ea 7/31/07

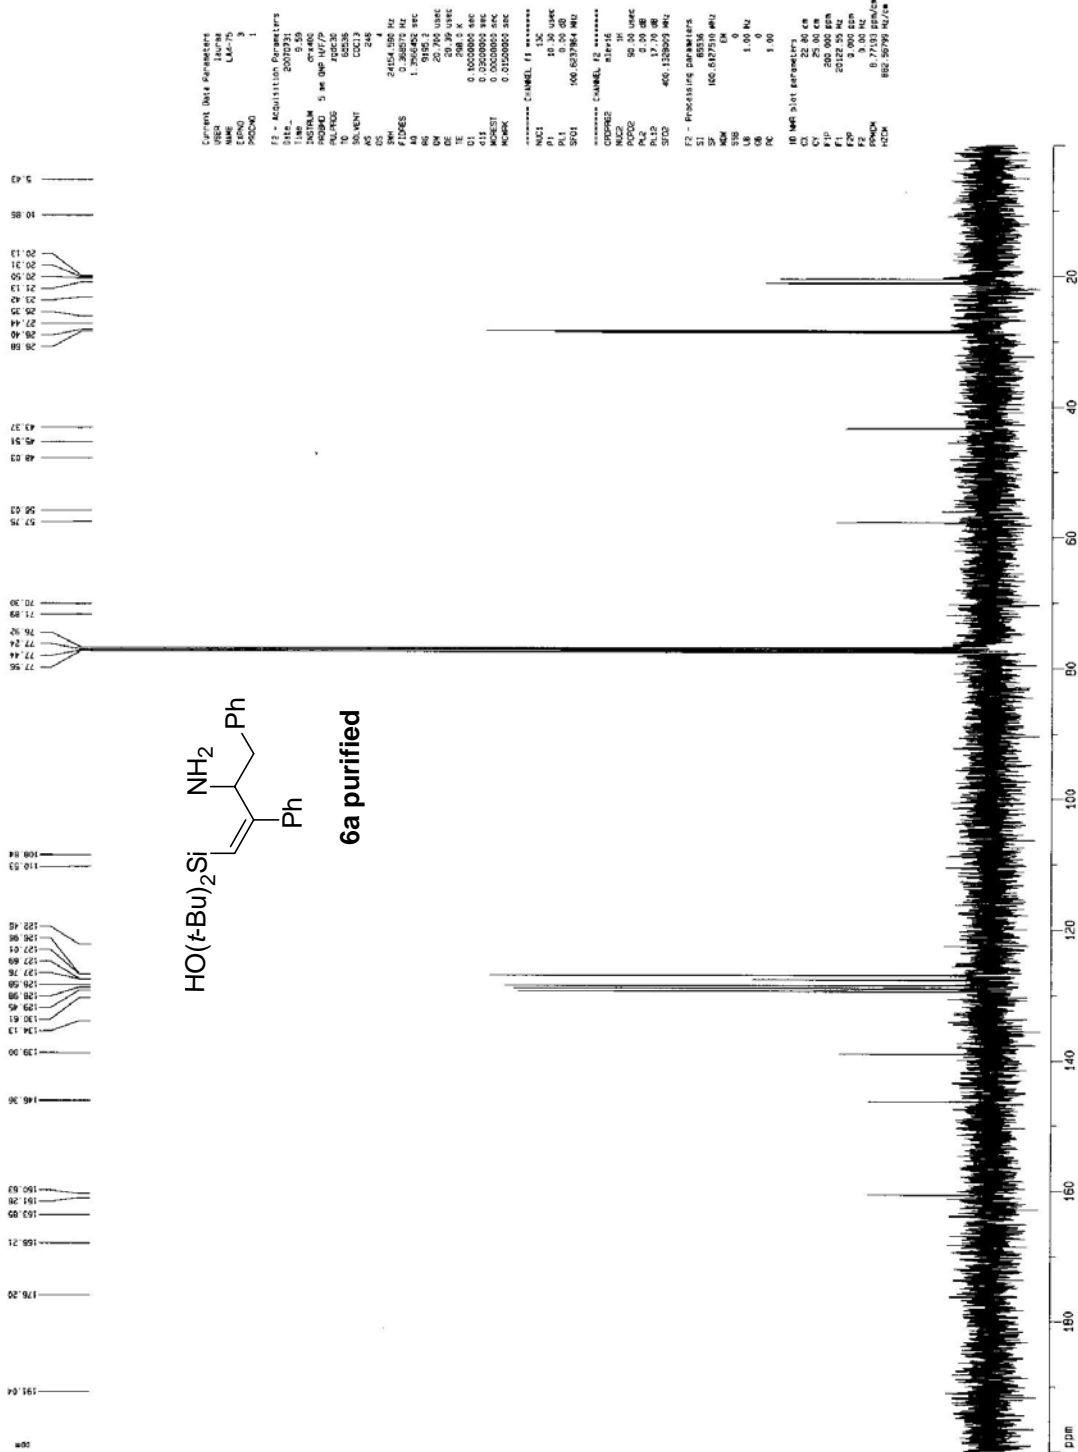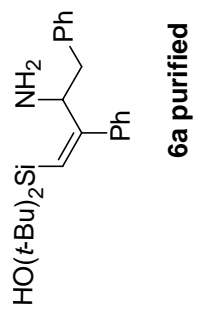

```

Current Data Parameters
=====
USER          Laura
EXPNO        1
PROCNO       1
PROCNAME     1
F2 - Acquisition Parameters
=====
Date_         20070731
Time          9.59
PROBHD       5 mm QNP 1H/1
PULPROG      zgpg30
AQ           0.02536
RG           327.5
AQ           0.02536
RG           327.5
AQ           0.02536
RG           327.5
TE           300.2 K
D1           0.10000000 sec
d11          0.00000000 sec
DELTA        0.00000000 sec
MORPH        0.01500000 sec
===== CHANNEL f1 =====
NUC1         13C
P1           12.00 usec
PL1          0.00 dB
SFO1         100.6279854 MHz
===== CHANNEL f2 =====
CPDPRG2     Mzgpg30
NUC2         1H
P2           12.00 usec
PL2          0.00 dB
SFO2         400.1433600 MHz
===== F2 - Processing parameters =====
SI           65536
SF           100.6279854 MHz
WDW          EM
SSB          0
LB           0.00 Hz
GB           0.00 Hz
PC           1.00
===== ID MS3 PLOT PARAMETERS =====
SI           65536
SF           100.6279854 MHz
WDW          EM
SSB          0
LB           0.00 Hz
GB           0.00 Hz
PC           1.00
=====
  
```





<sup>13</sup>C of LA4-133-3 for characterization 1/30/08

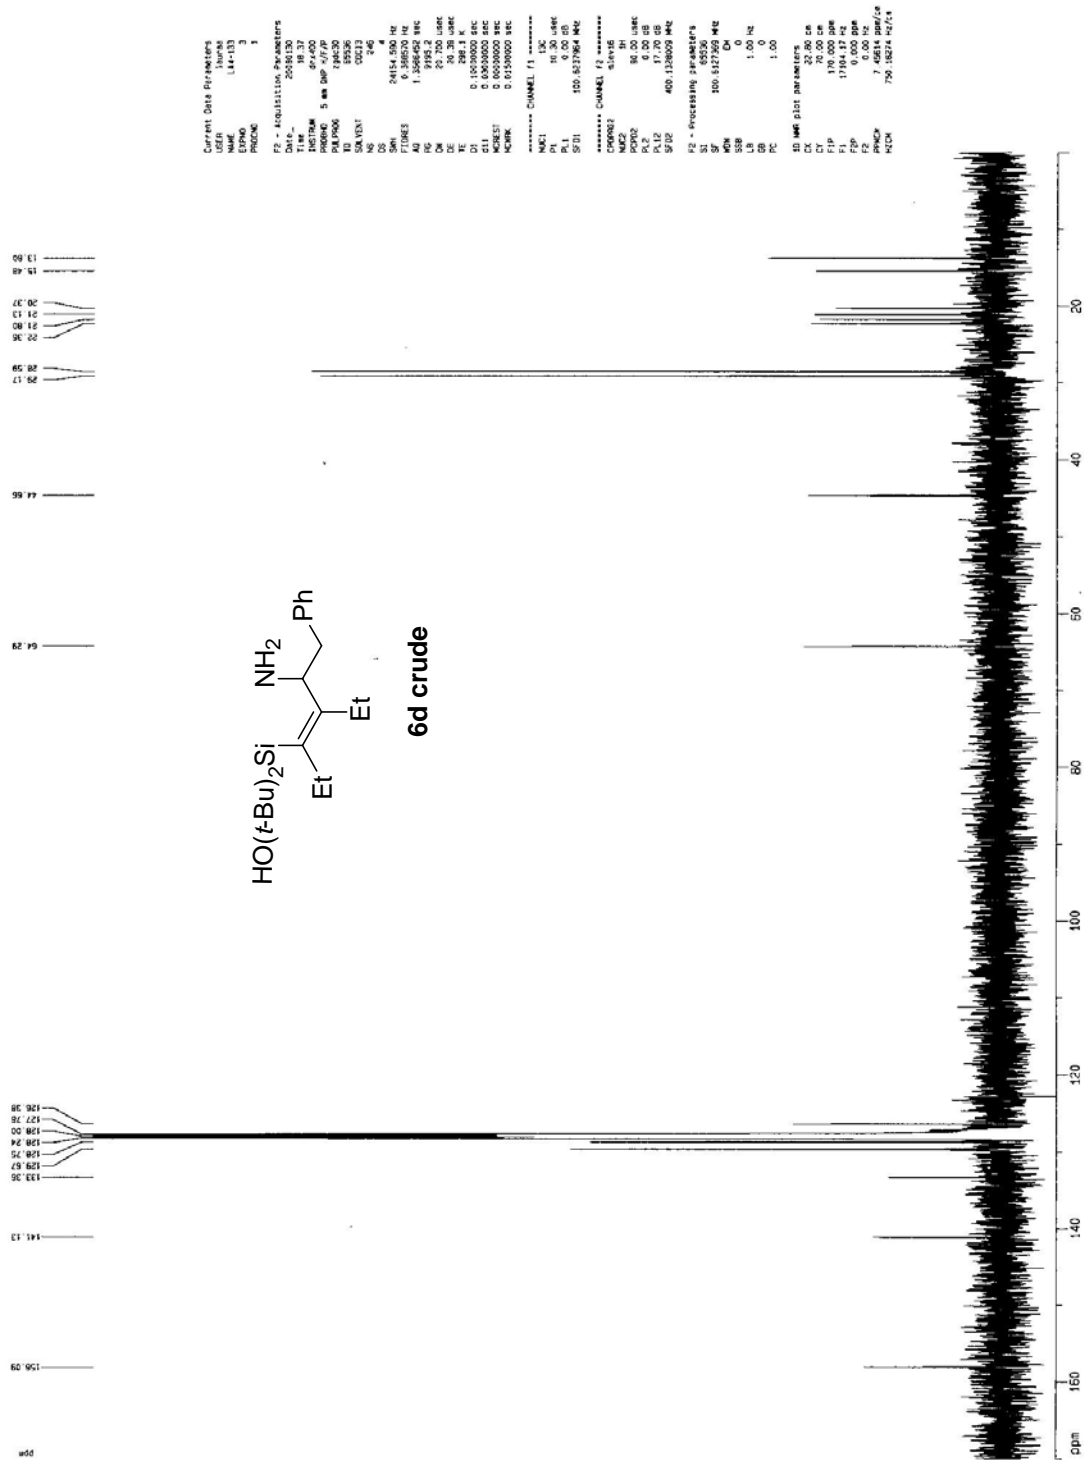

Current Data Parameters  
 NAME LA4-133  
 EXPNO 3  
 PROCNO 1  
 F2 - Acquisition Parameters  
 Date\_ 2008130  
 Time 17:00:00  
 INSTRUM spect  
 PROBMG 5 mm BBO v/FP  
 PULPROG zgpg30  
 SFO 400.126053  
 SA VENT  
 NS 2048  
 DS 4  
 SWH 24154.900 Hz  
 FIDRES 0.248620 Hz  
 AQ 1.3096405 sec  
 RG 327.5  
 DQ 21.700 uS  
 DE 39.28 uS  
 TE 300.2 K  
 D1 0.10000000 sec  
 d11 0.00000000 sec  
 d111 0.00000000 sec  
 ACQRES1 0.00000000 sec  
 ACQRES 0.01000000 sec  
 \*\*\*\*\* CHANNEL f1 \*\*\*\*\*  
 NU1 16  
 PL1 16.50 uS  
 SFO1 400.126053 MHz  
 \*\*\*\*\* CHANNEL f2 \*\*\*\*\*  
 CPDPRG2 Slv16  
 NU2 16  
 PL2 16.50 uS  
 SFO2 400.126053 MHz  
 F2 - Processing parameters  
 SI 65536  
 SF 400.126053 MHz  
 KW 0  
 SB 0  
 B 1.00 Hz  
 DB 1.00  
 PC 1.00  
 IS -IMP list parameters  
 CY 32.00 cm  
 F1 70.00 cm  
 F1P 170.000 ppm  
 F2 0.500 ppm  
 F2P 0.00 Hz  
 HZ 705.18274 MHz

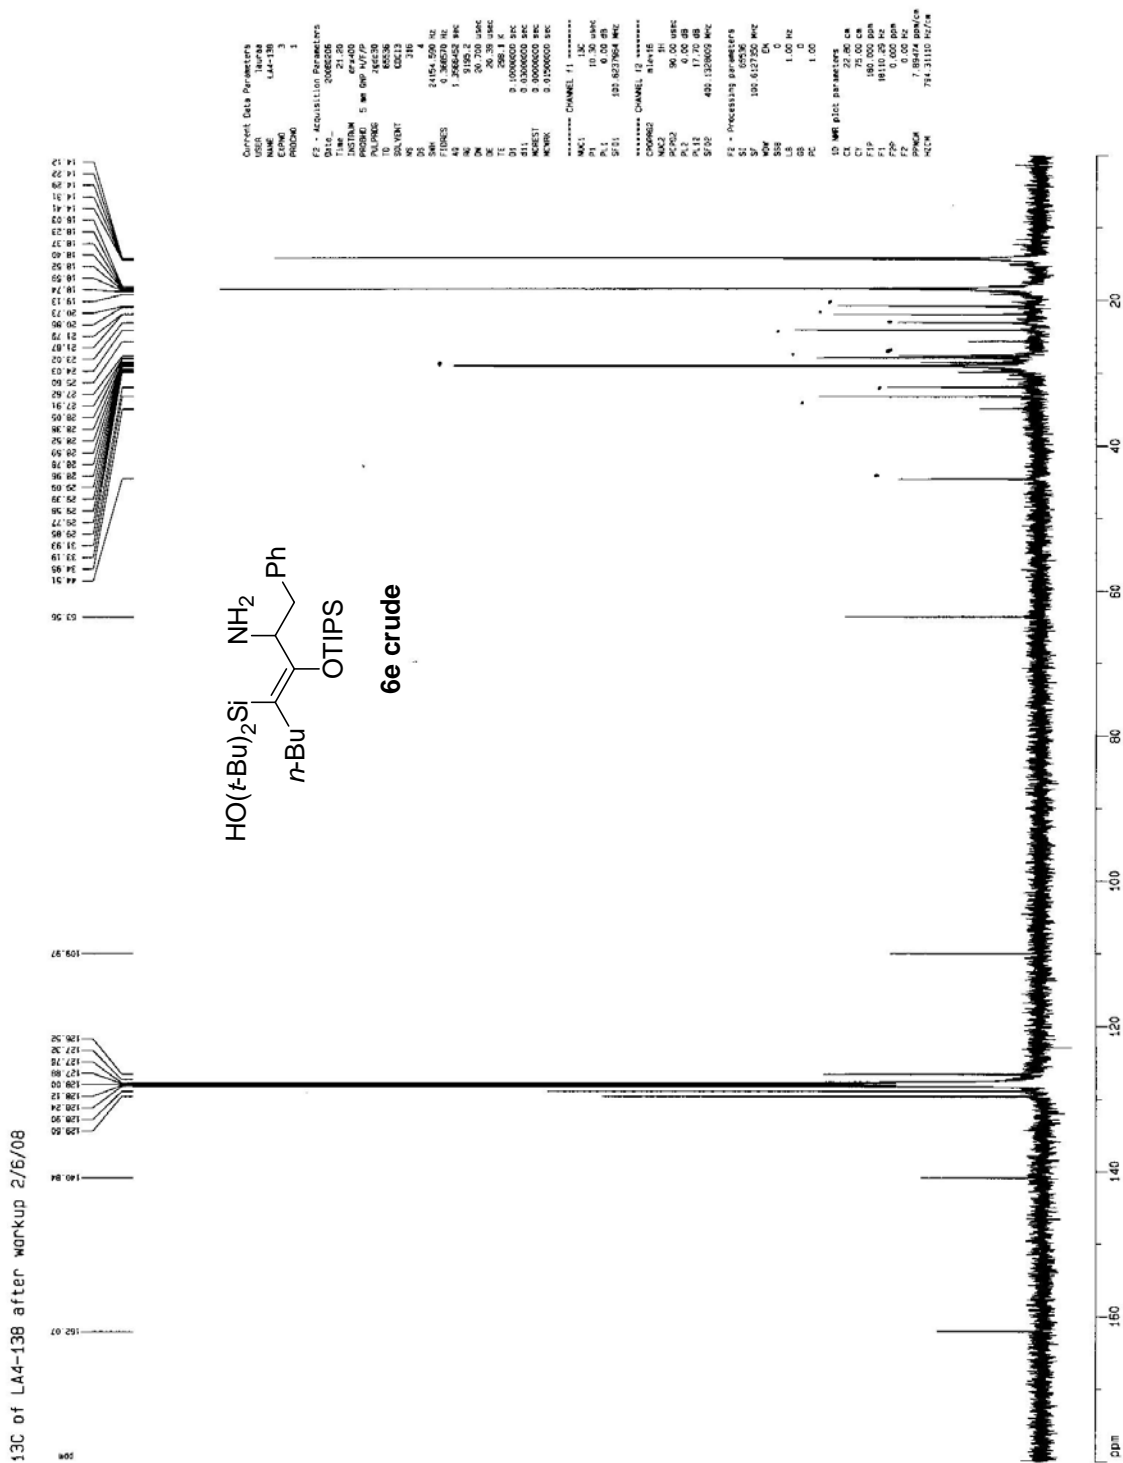



<sup>13</sup>C of LA4-88-2 middle fractions off column 8/7/07

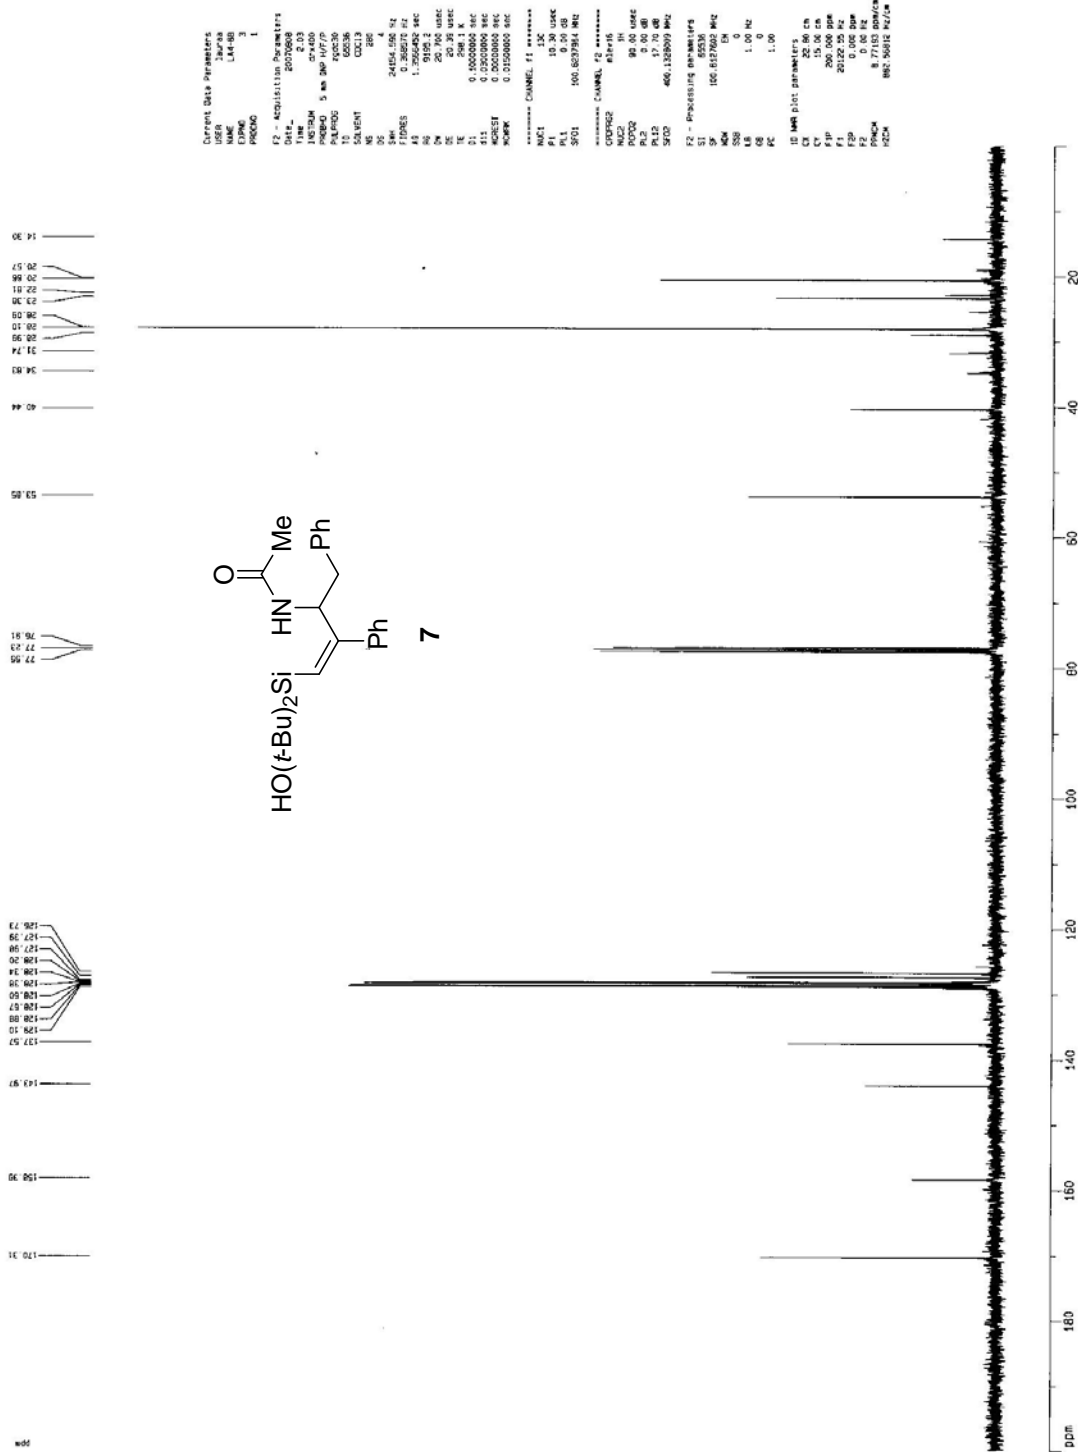

Current Data Parameters  
 USER Laura  
 SAMPLE LA4-88  
 CONC 1  
 PRCONO 1

Acquisition Parameters  
 Date\_ 20070808  
 Time 2:03  
 INSTRM 5  
 METHOD 5  
 PULPROG zgpg30  
 PCPRG05  
 SOLVENT CDCl3  
 NS 4  
 DS 4  
 SWH 24000.000 Hz  
 FIDRES 1.2000000 sec  
 AQ 9195.2 sec  
 RG 20790.000  
 DT 0.1000000 sec  
 TE 298.15 K  
 D1 0.1000000 sec  
 D2 0.1000000 sec  
 ACQRES 0.2000000 sec  
 SCANS 100  
 NORMF 0.0100000 sec

\*\*\*\*\* CHANNEL f1 \*\*\*\*\*  
 NUC1 13C  
 P1 10.00 usec  
 PL1 0.00 dB  
 SFO1 100.6207844 MHz

\*\*\*\*\* CHANNEL f2 \*\*\*\*\*  
 NUC2 1H  
 P2 10.00 usec  
 PL2 0.00 dB  
 SFO2 400.1388000 MHz

F2 - Processing parameters  
 SF 400.1388000 MHz  
 DS 4  
 SW 24000.000 Hz  
 FWHM 1.00 Hz  
 GB 0  
 PC 1.00

ID MSN list parameters  
 C1 12.00 cm  
 C2 12.00 cm  
 F1 P 200.0000000  
 F2 201.0200000 Hz  
 Q1 0.0000000  
 Q2 0.0000000  
 PRNCH 8.77183 ADVANCE  
 PZCM 882.00018 MHz

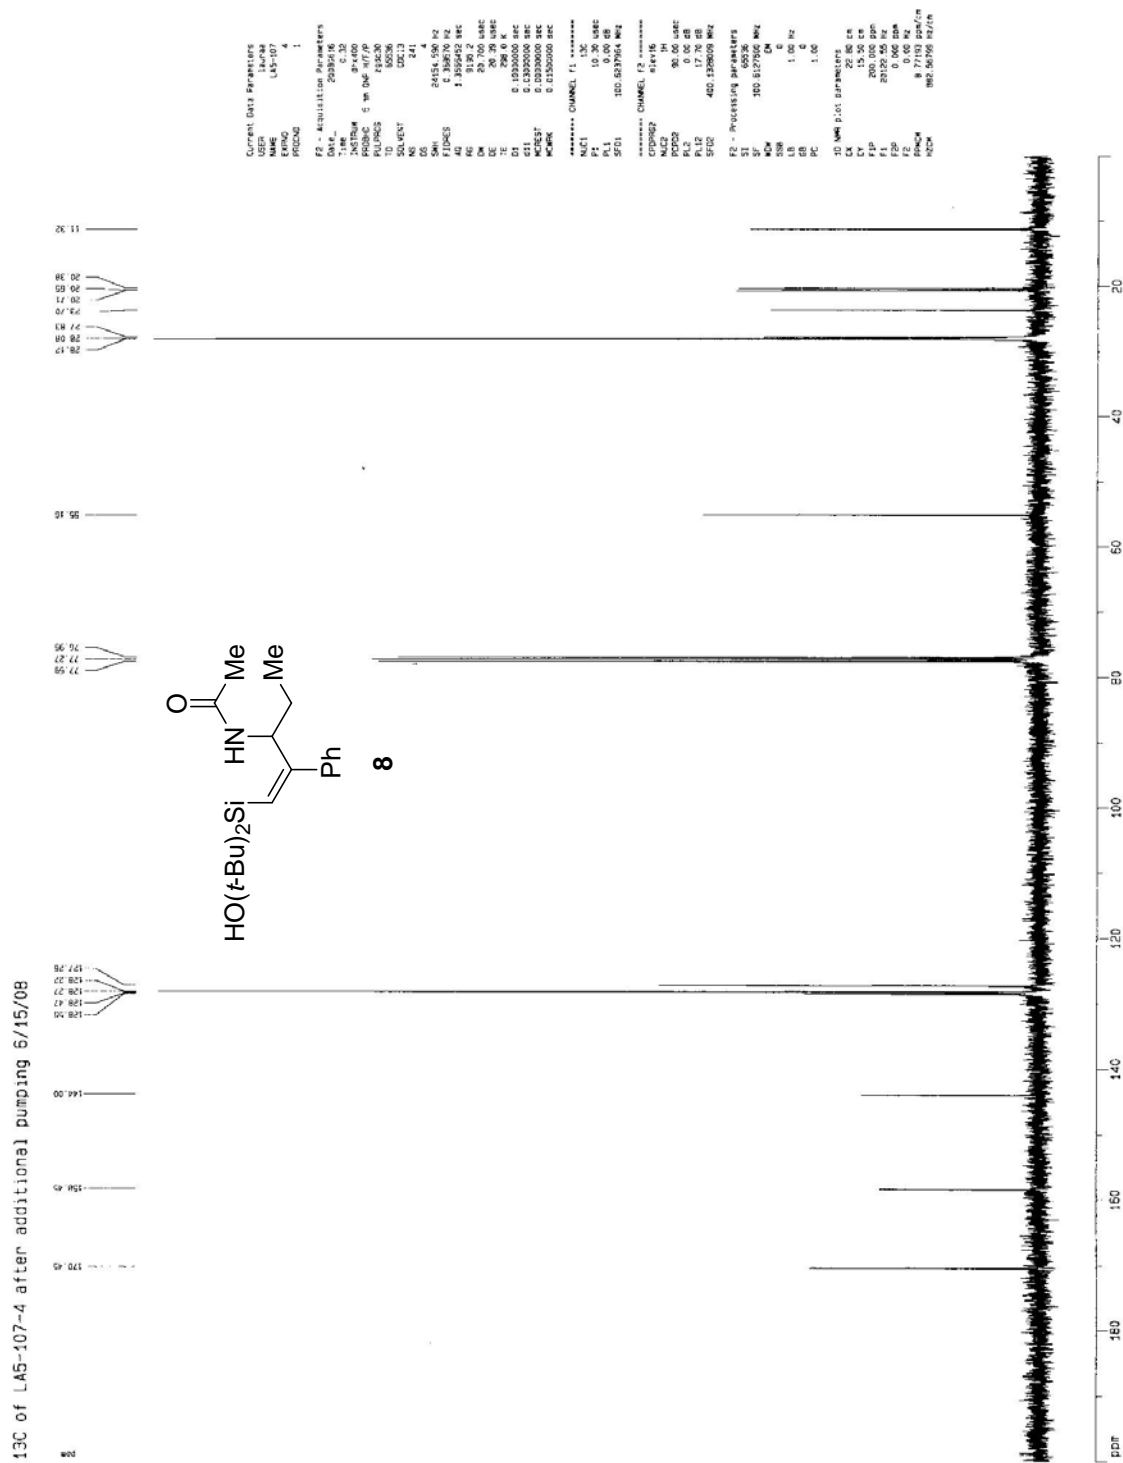

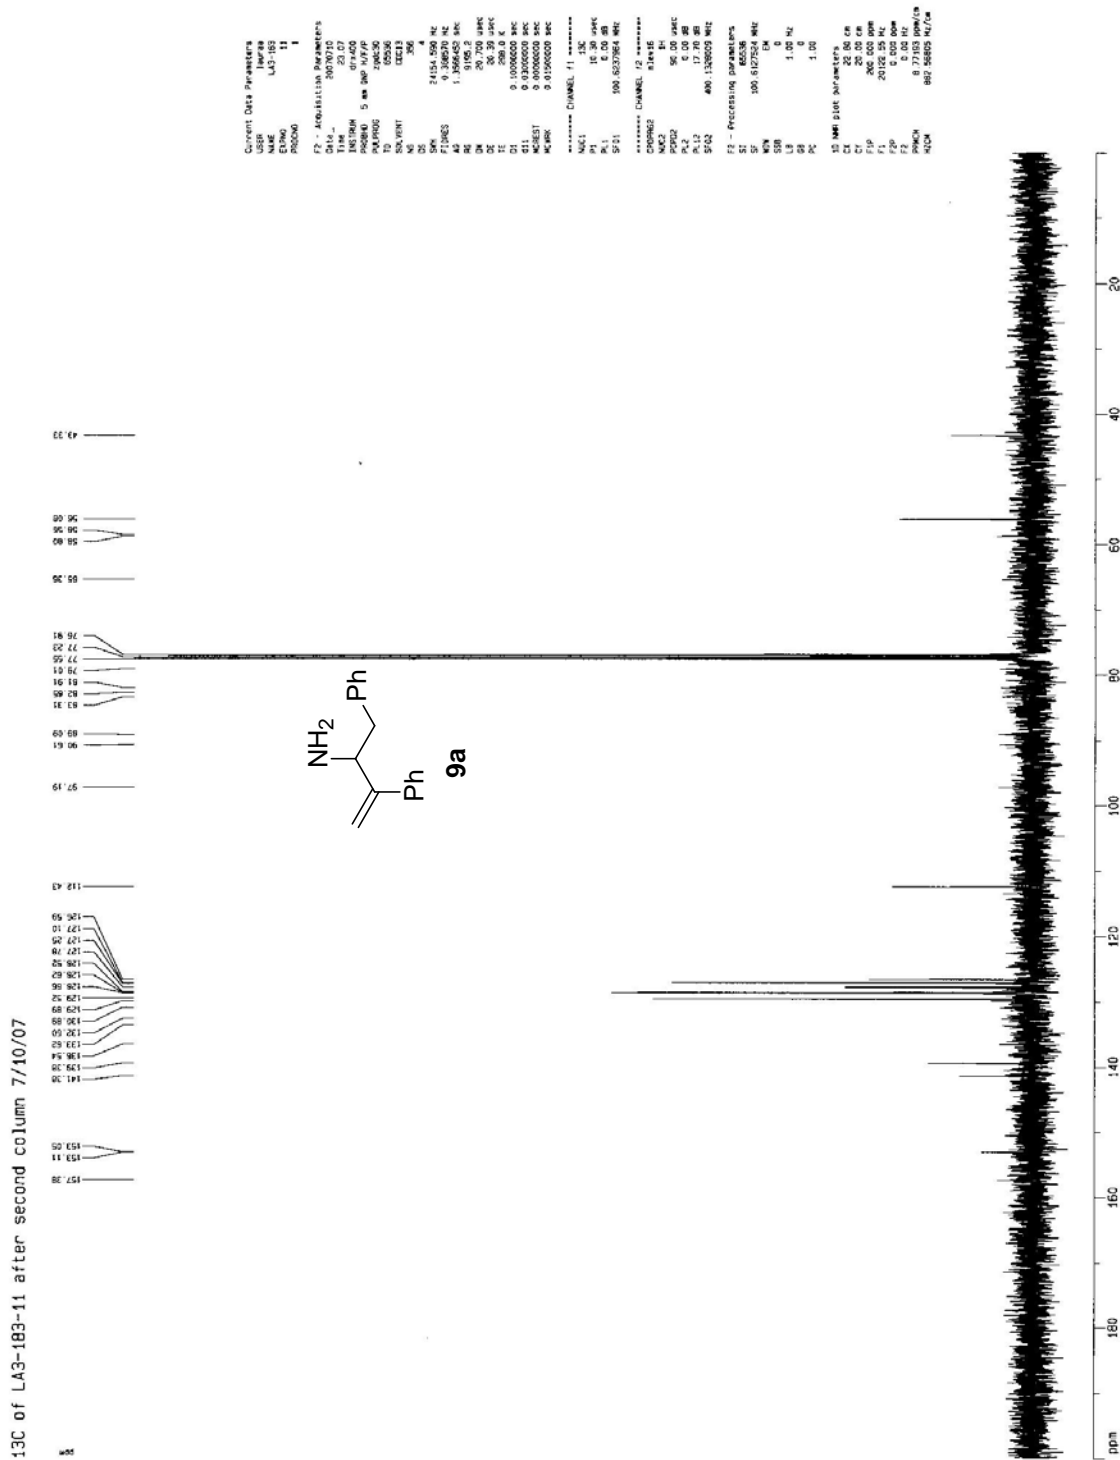

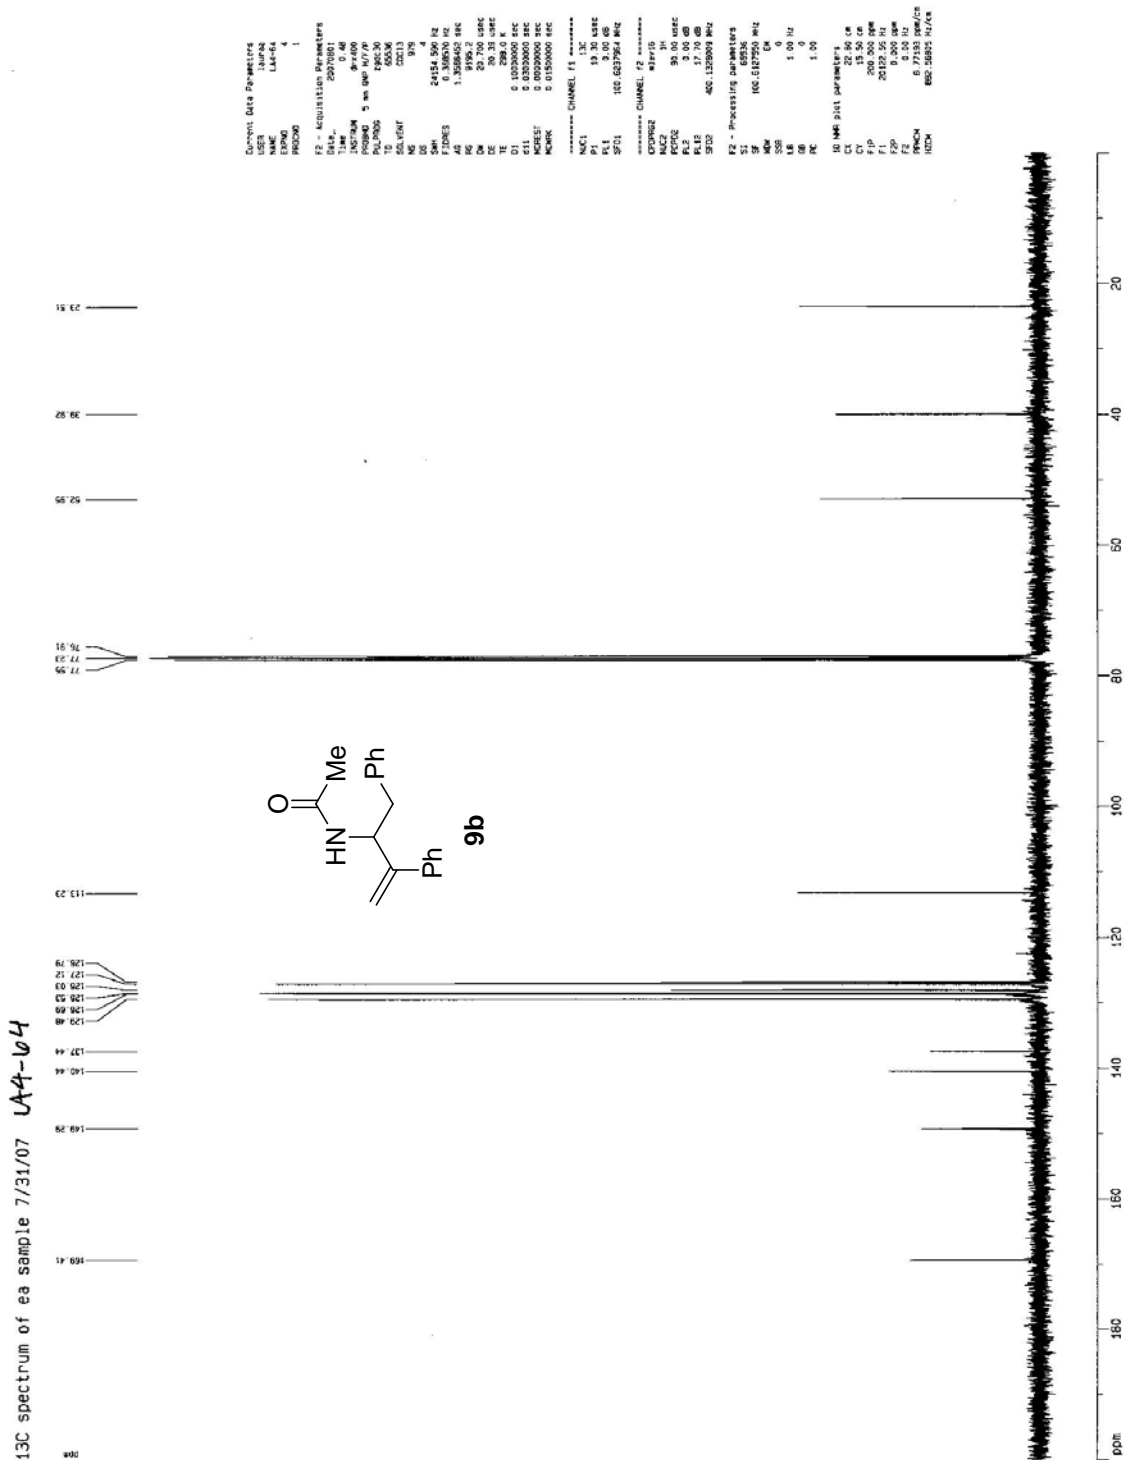

<sup>13</sup>C of LA4-160-2 2/21/08

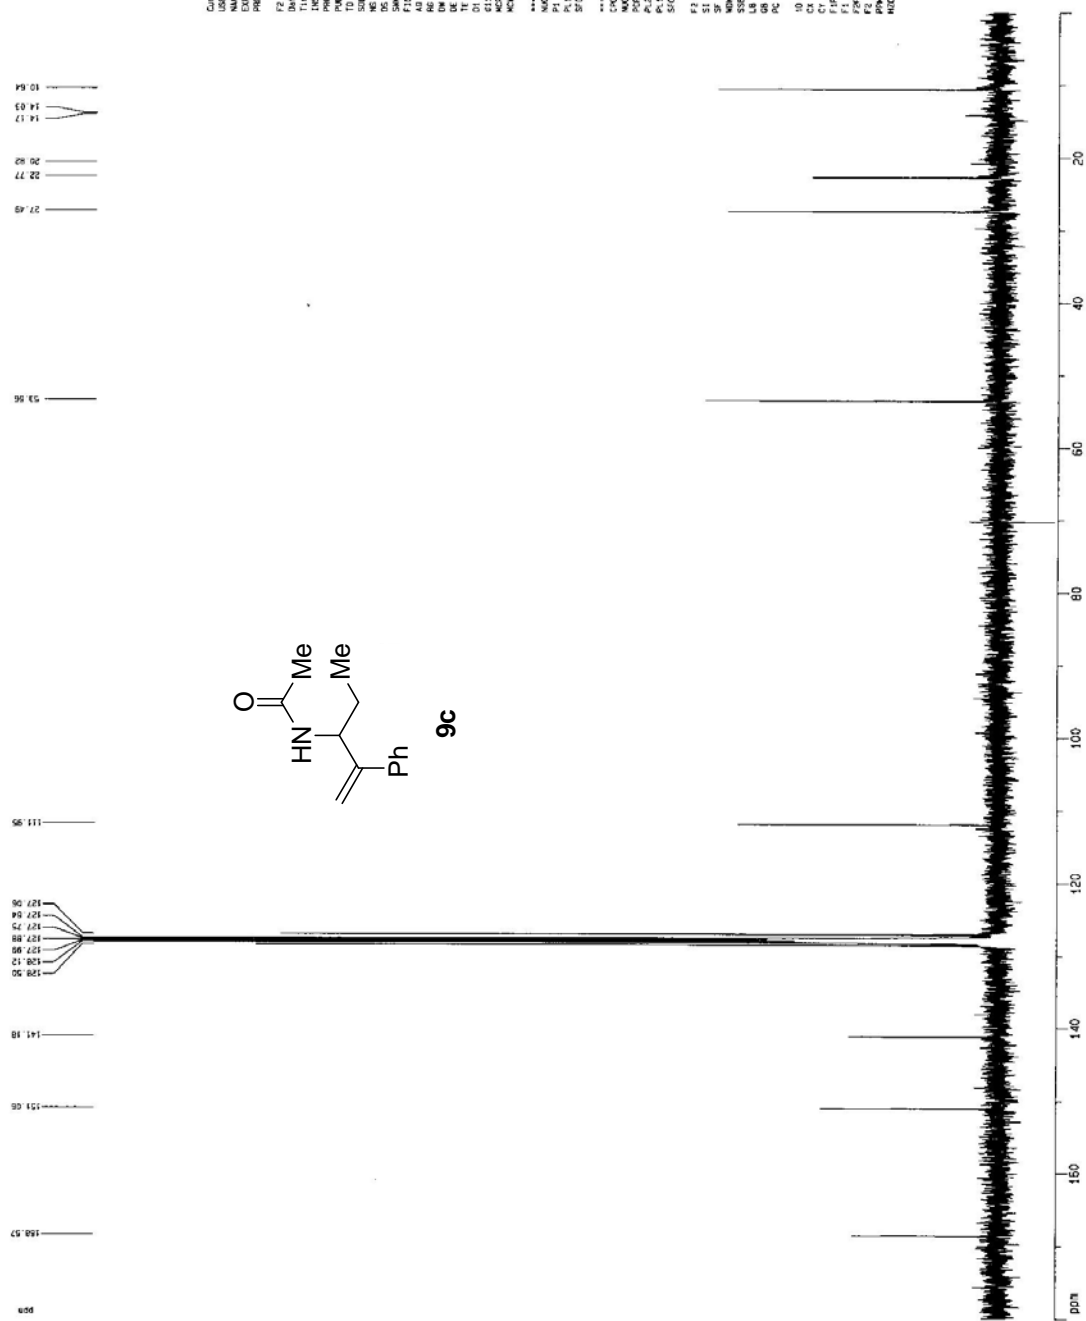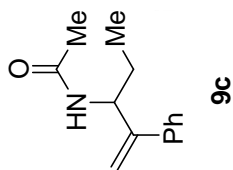

```

Current Data Parameters
Date_      20080221
Time       15.24
EXPNO     3
PROCNO    1
F2 - Acquisition Parameters
Date_      20080221
Time       15.24
EXPNO     3
PROCNO    1
PULPROG   zgpg30
TD         65536
AQ         0.40000000
RG         512
SFO1       100.627984 MHz
NUC1       13C
PC1        1.00
SFO2       100.627984 MHz
PC2        1.00
SFO3       100.627984 MHz
PC3        1.00
SFO4       100.627984 MHz
PC4        1.00
SFO5       100.627984 MHz
PC5        1.00
SFO6       100.627984 MHz
PC6        1.00
SFO7       100.627984 MHz
PC7        1.00
SFO8       100.627984 MHz
PC8        1.00
SFO9       100.627984 MHz
PC9        1.00
SFO10      100.627984 MHz
PC10       1.00
F2 - Processing parameters
SI         32768
SF          100.627984 MHz
WDW         EM
SSB         0
LB          0
GB          0
PC          1.00
RC          1.00
D0 MMR parameters
C1         0.00000000
C2         0.00000000
C3         0.00000000
C4         0.00000000
C5         0.00000000
C6         0.00000000
C7         0.00000000
C8         0.00000000
C9         0.00000000
C10        0.00000000
C11        0.00000000
C12        0.00000000
C13        0.00000000
C14        0.00000000
C15        0.00000000
C16        0.00000000
C17        0.00000000
C18        0.00000000
C19        0.00000000
C20        0.00000000
C21        0.00000000
C22        0.00000000
C23        0.00000000
C24        0.00000000
C25        0.00000000
C26        0.00000000
C27        0.00000000
C28        0.00000000
C29        0.00000000
C30        0.00000000
C31        0.00000000
C32        0.00000000
C33        0.00000000
C34        0.00000000
C35        0.00000000
C36        0.00000000
C37        0.00000000
C38        0.00000000
C39        0.00000000
C40        0.00000000
C41        0.00000000
C42        0.00000000
C43        0.00000000
C44        0.00000000
C45        0.00000000
C46        0.00000000
C47        0.00000000
C48        0.00000000
C49        0.00000000
C50        0.00000000
C51        0.00000000
C52        0.00000000
C53        0.00000000
C54        0.00000000
C55        0.00000000
C56        0.00000000
C57        0.00000000
C58        0.00000000
C59        0.00000000
C60        0.00000000
C61        0.00000000
C62        0.00000000
C63        0.00000000
C64        0.00000000
C65        0.00000000
C66        0.00000000
C67        0.00000000
C68        0.00000000
C69        0.00000000
C70        0.00000000
C71        0.00000000
C72        0.00000000
C73        0.00000000
C74        0.00000000
C75        0.00000000
C76        0.00000000
C77        0.00000000
C78        0.00000000
C79        0.00000000
C80        0.00000000
C81        0.00000000
C82        0.00000000
C83        0.00000000
C84        0.00000000
C85        0.00000000
C86        0.00000000
C87        0.00000000
C88        0.00000000
C89        0.00000000
C90        0.00000000
C91        0.00000000
C92        0.00000000
C93        0.00000000
C94        0.00000000
C95        0.00000000
C96        0.00000000
C97        0.00000000
C98        0.00000000
C99        0.00000000
C100       0.00000000
    
```

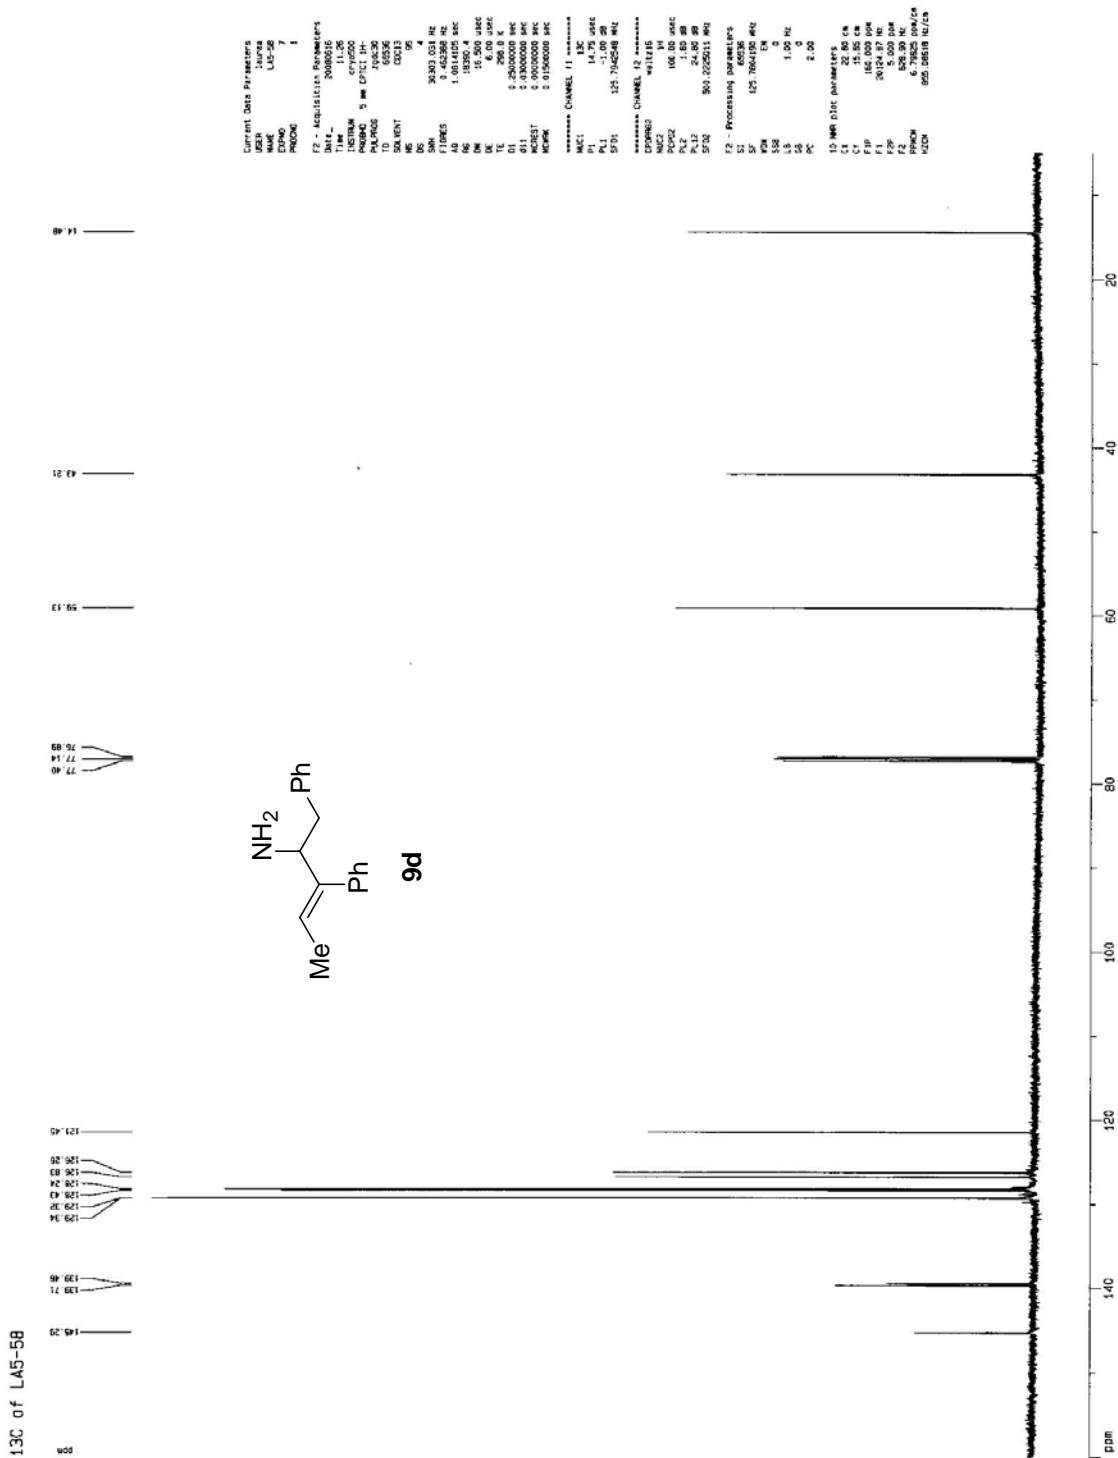

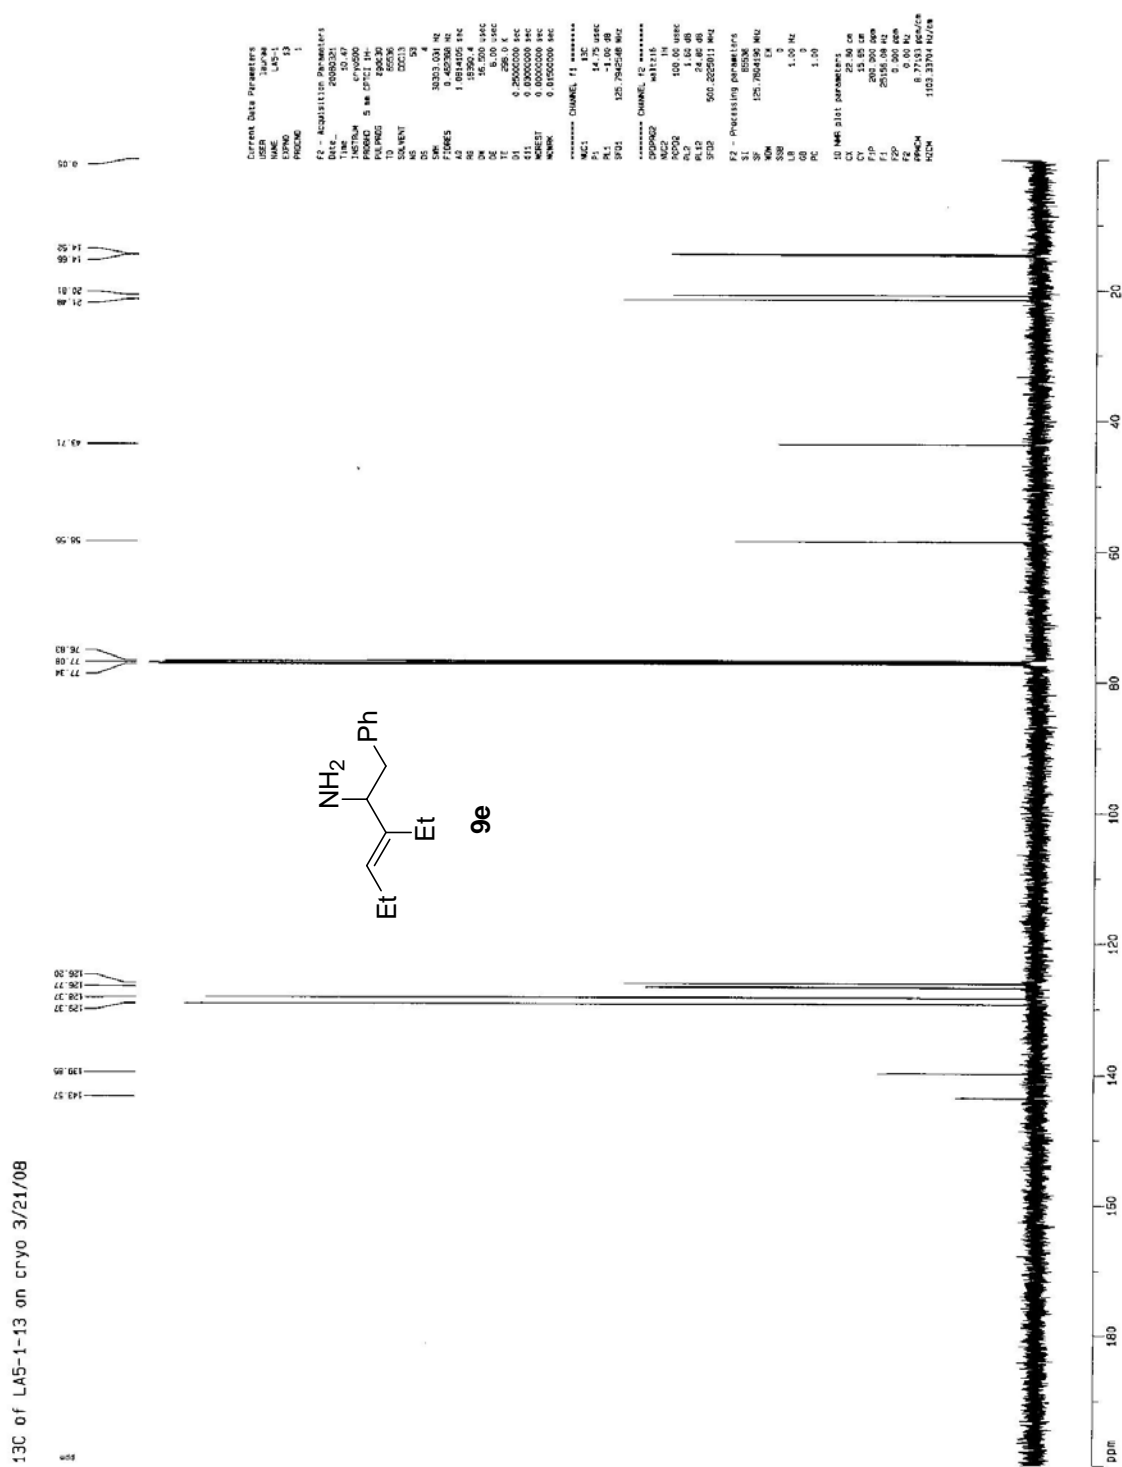

<sup>13</sup>C of LA5-85-1 on cryo 4/29/09

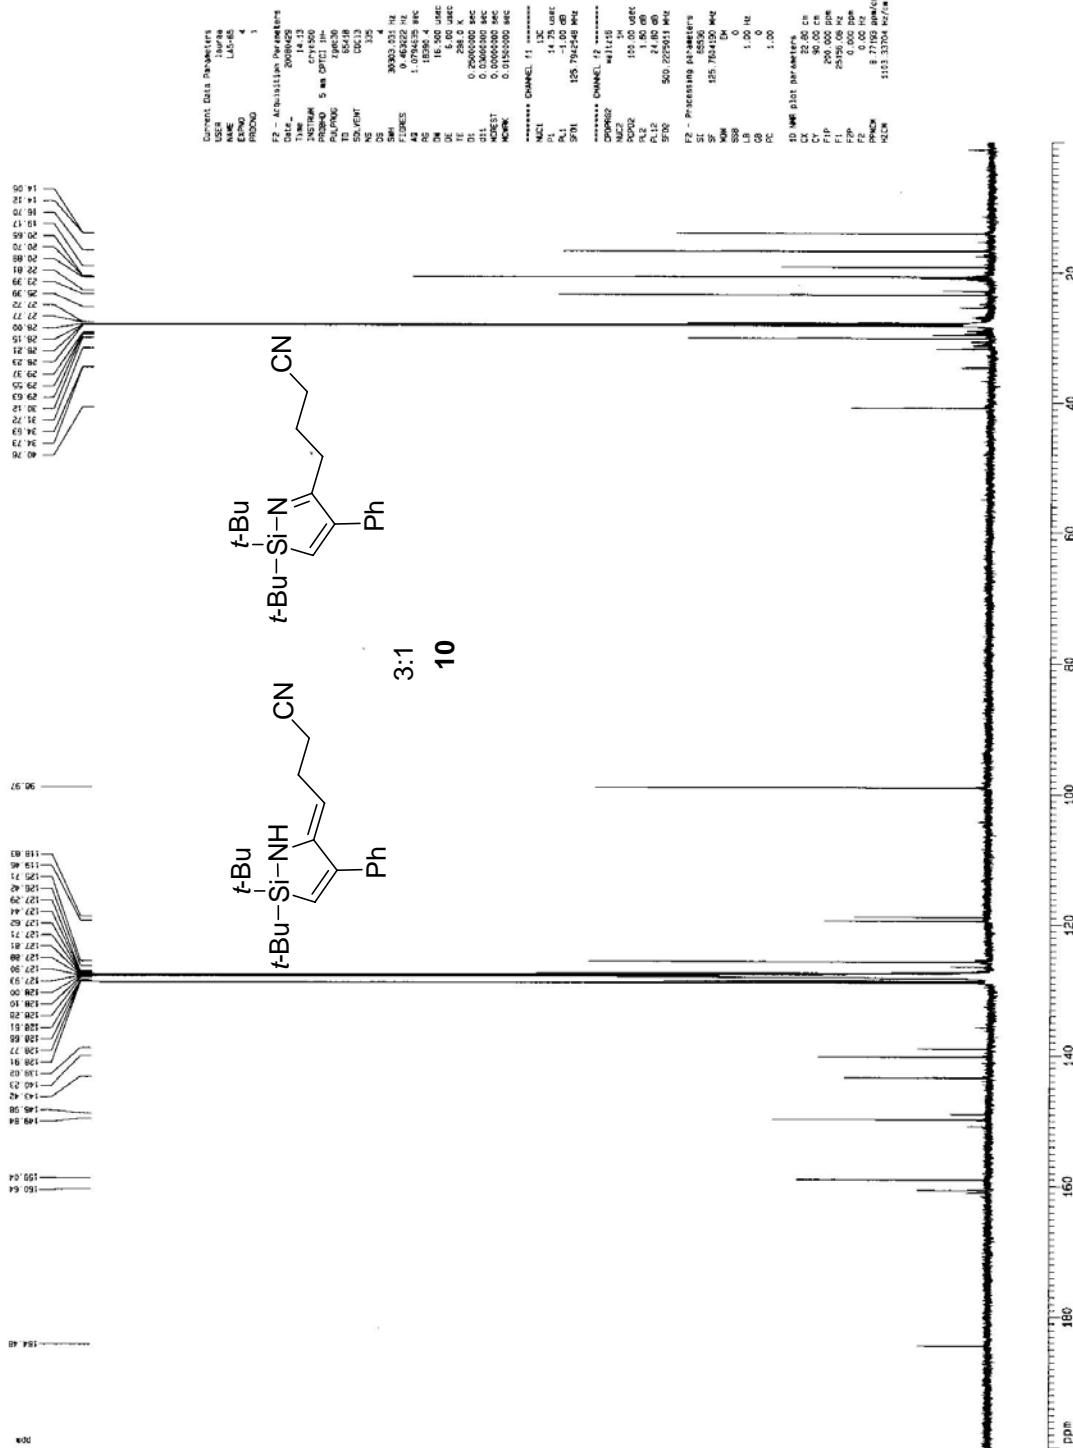

Experiment Parameters  
 USER: laura  
 NAME: LA5-85  
 EXPNO: 4  
 PROCNO: 1  
 F2 - Acquisition Parameters  
 DATE\_ : 20090429  
 TIME : 14.13  
 INSTRUM: cryo500  
 PROBO: 5 mm DPFI-1H  
 TD: 65536  
 TO: 18018  
 SOLVENT: DMSI  
 NS: 1024  
 DS: 4  
 SWH: 30903.051 Hz  
 FIDRES: 0.46322 Hz  
 AQ: 0.00010000 sec  
 RG: 18396.4  
 DM: 16.500 kHz  
 UG: 0.00000000 sec  
 D1: 0.20000000 sec  
 d11: 0.00000000 sec  
 SFO: 500.1362500 MHz  
 NUC1: 13C  
 NUC2: 13C  
 P1: 14.75 usec  
 PL1: -1.00 dB  
 SFO1: 125.761430 MHz  
 ===== CHANNEL f2 =====  
 NUC2: 13C  
 P2: 14.75 usec  
 PL2: -1.00 dB  
 SFO2: 125.761430 MHz  
 ===== CHANNEL f3 =====  
 NUC3: 13C  
 P3: 14.75 usec  
 PL3: -1.00 dB  
 SFO3: 125.761430 MHz  
 F2 - Processing parameters  
 SF: 125.761430 MHz  
 WHW: 32768.000 Hz  
 LB: 1.20 Hz  
 GB: 0  
 PC: 1.00  
 ID: NMR P131 Parameters  
 CX: 32.80 cm  
 CY: 32.80 cm  
 FIP: 200.000 cm  
 F1: 25395.08 Hz  
 F2: 0.000 Hz  
 F3: 0.000 Hz  
 PRCN: 8.7719300000  
 HLEN: 113.33704 Hz/cm



<sup>13</sup>C of LA5-B7-3 on cryo 4/29/08

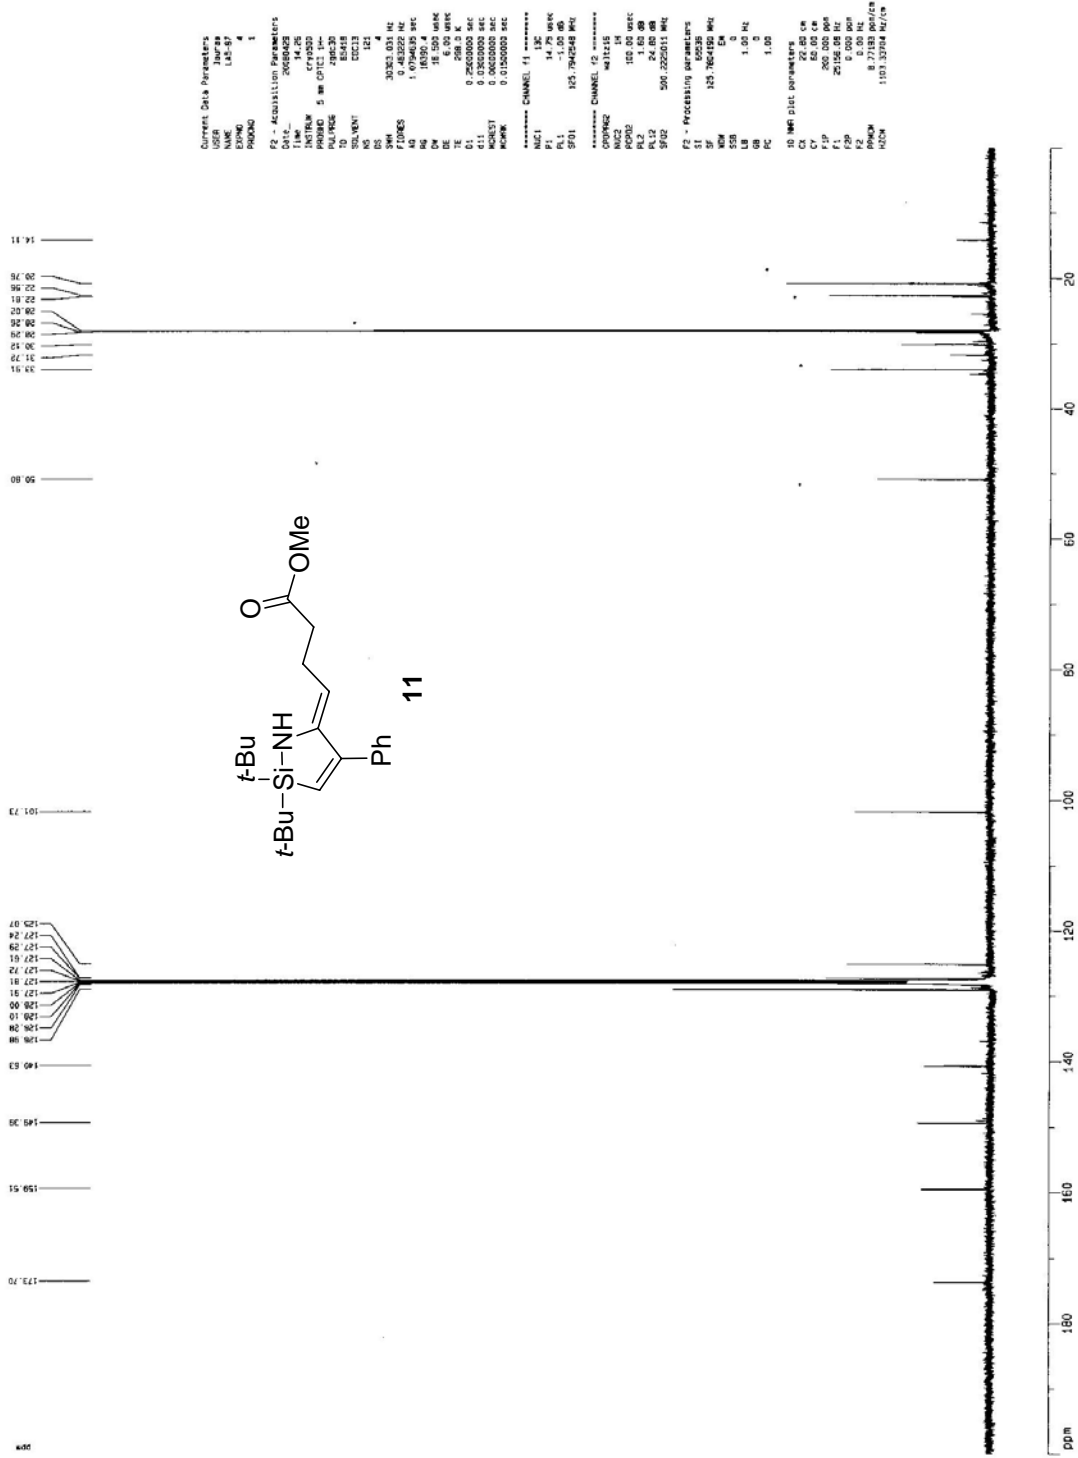

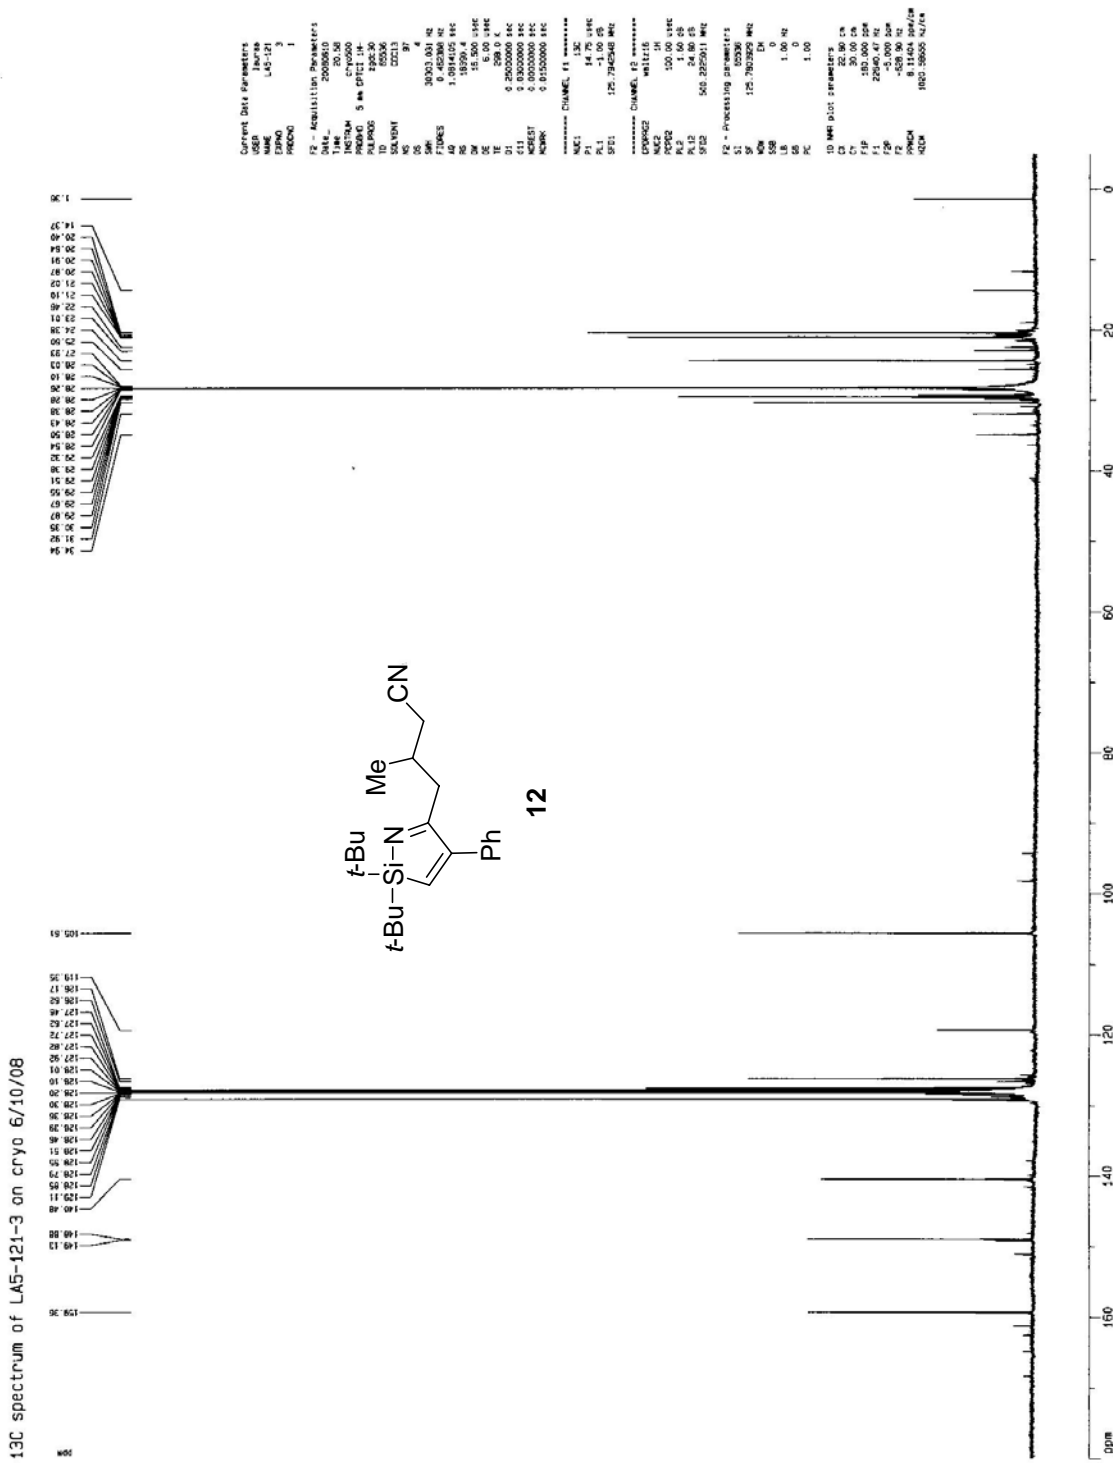

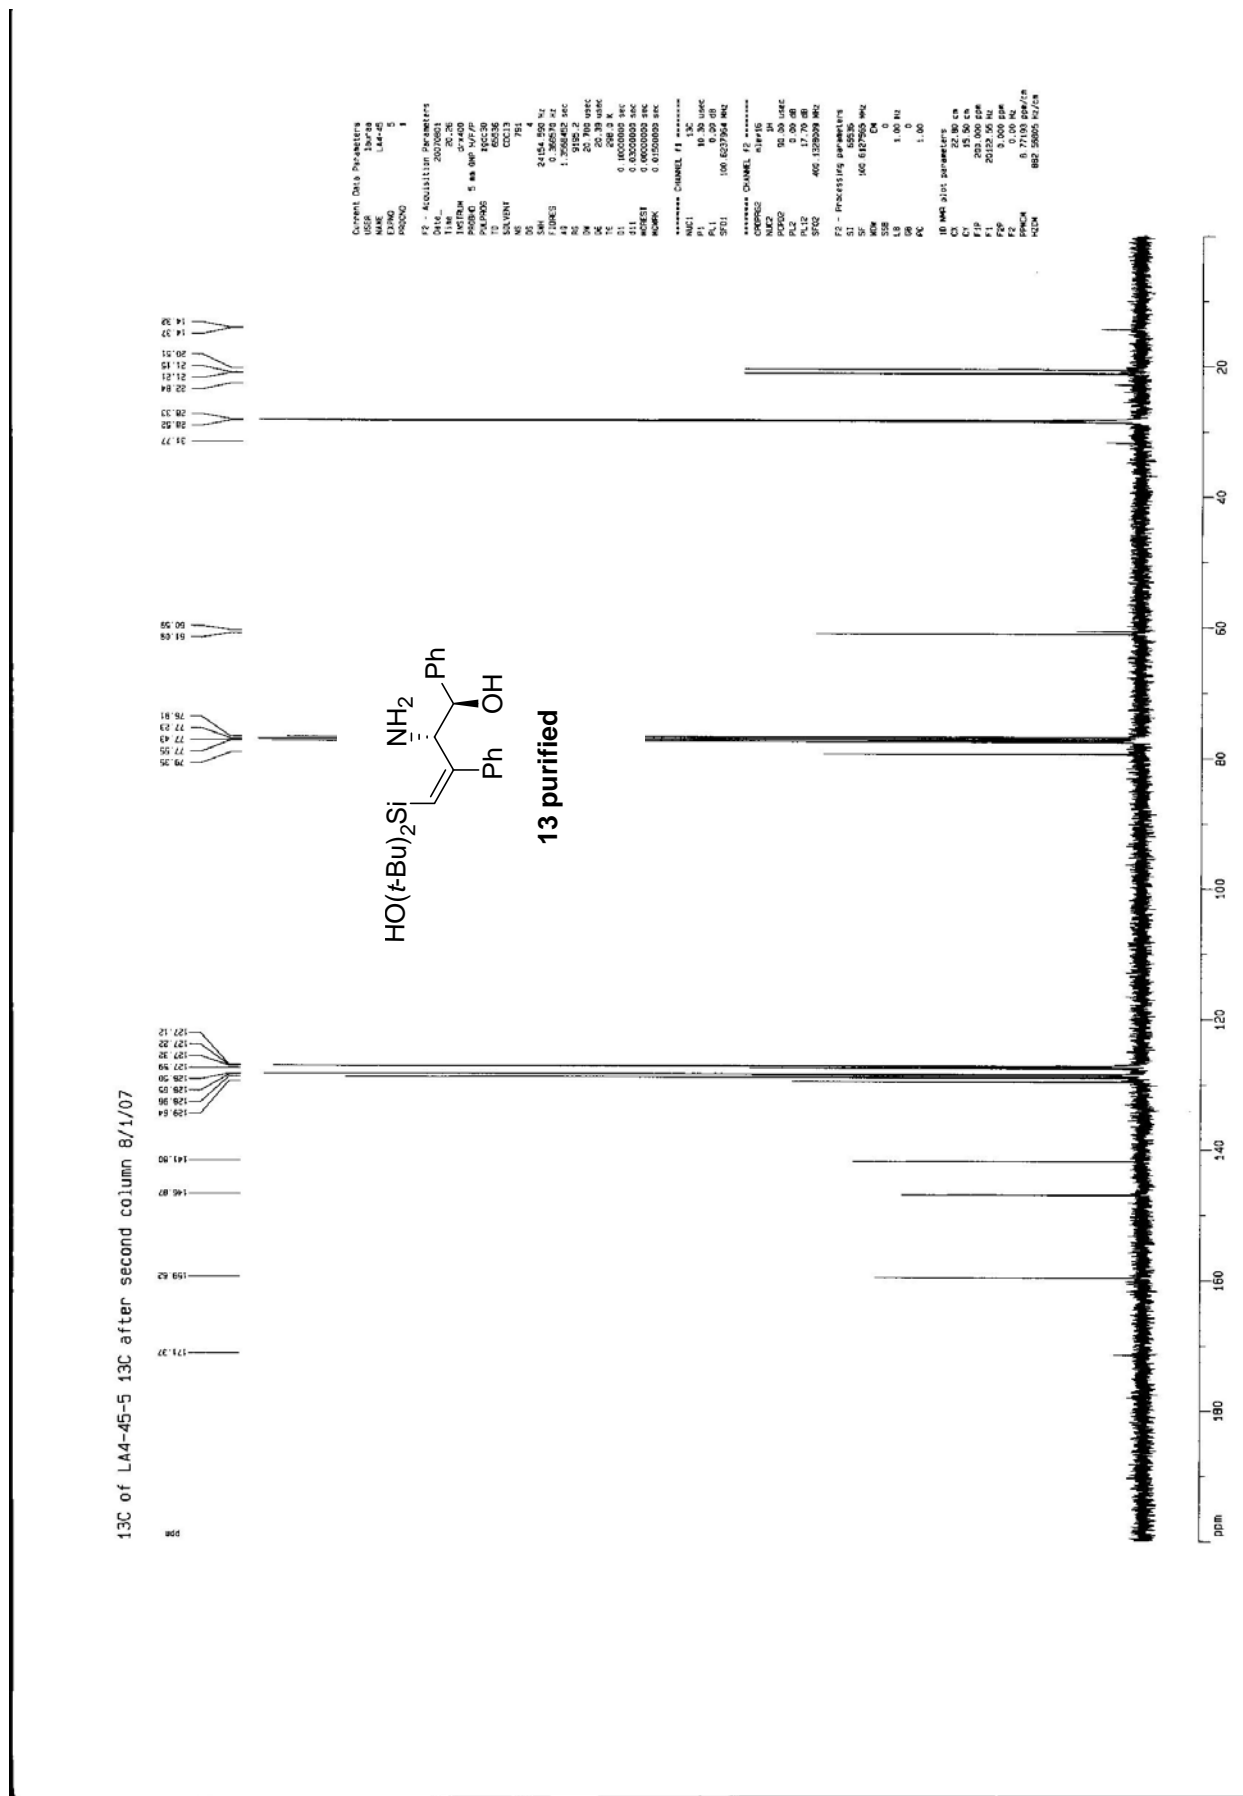

Supplement: NIHMS91487-supplement-2_si_002.pdf [file NIHMS91487-supplement-2_si_002.pdf]
